# Supplementary material for: Parental methylome reprogramming in human uniparental blastocysts reveals germline memory transition
Source: PubMed Central journal article supplement — Genome Res. 2021 Sep;31(9):1519–30. doi: 10.1101/gr.273318.120 (PMC8415376; doi:10.1101/gr.273318.120), 2021-09
Supplement: supp_gr.273318.120_Supplemental_Figures.pdf [file supp_gr.273318.120_Supplemental_Figures.pdf]

# Figure S1

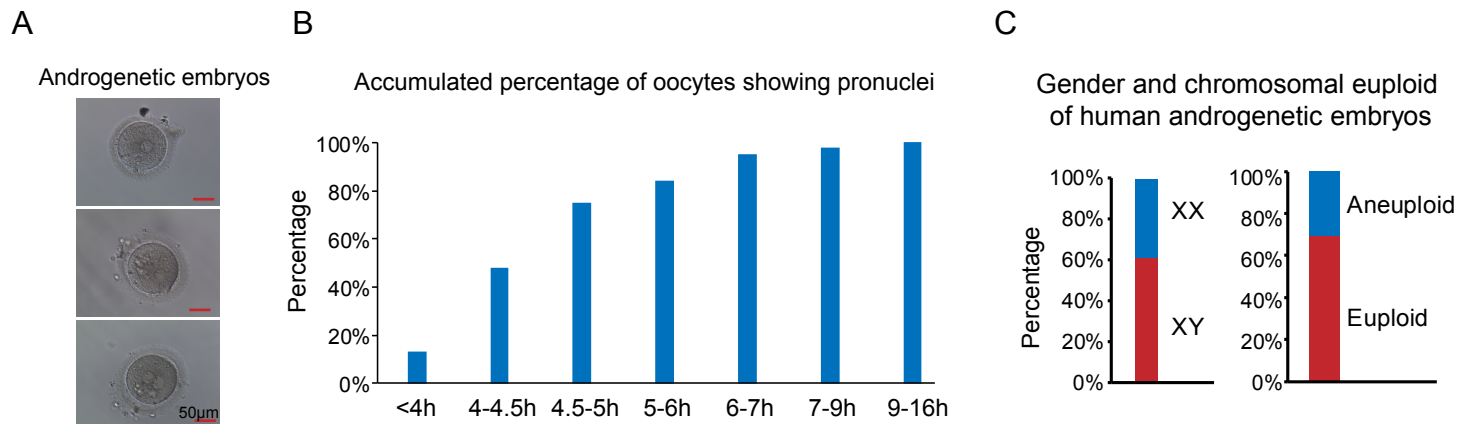

**D**

DNA fingerprint of genetic identification for donor gametes and diploid androgenic embryos

| Androgenetic Diploid Embryo | Oocyte  | P-C Heritability* Freq(Donor1) | Oocyte Donor 2 | P-C Heritability Freq(Donor2) | P-C Heritability Freq(Sperm) | Androgenetic (Yes/No) |
|-----------------------------|---------|--------------------------------|----------------|-------------------------------|------------------------------|-----------------------|
|                             | Donor 1 |                                |                |                               |                              |                       |
| 31682-1                     | B31682  | 0.888055                       | B31682         | 0.888055                      | 0.96616                      | Yes                   |
| 30323-4                     | B30571  | 0.891004                       | B30323         | 0.891956                      | 0.999767                     | Yes                   |
| 31579-1                     | B31579  | 0.884245                       | B31579         | 0.884245                      | 0.99989                      | Yes                   |
| 31640-3                     | B31640  | 0.893617                       | B31640         | 0.893617                      | 0.999864                     | Yes                   |
| 30497-3                     | B30497  | 0.987566                       | B30497         | 0.987566                      | 0.956267                     | NO                    |
| 31572-2                     | B31572  | 0.931614                       | B31572         | 0.931614                      | 0.999864                     | Yes                   |
| 30400-1                     | B30400  | 0.898622                       | B30400         | 0.898622                      | 0.999926                     | Yes                   |
| 08822-1                     | B08822  | 0.889883                       | B08822         | 0.889883                      | 0.999873                     | Yes                   |
| 30931-3                     | B30931  | 0.891324                       | B30931         | 0.891324                      | 0.99989                      | Yes                   |
| 30931-2                     | B30931  | 0.921917                       | B30931         | 0.921917                      | 0.985571                     | Yes                   |
| 14822-1                     | B30931  | 0.879684                       | B14822         | 0.879912                      | 0.999421                     | Yes                   |
| 27250-1                     | B27250  | 0.856771                       | B27250         | 0.856771                      | 0.999676                     | Yes                   |
| 27250-2                     | B27250  | 0.858671                       | B27250         | 0.858671                      | 0.99966                      | Yes                   |
| 31578-1                     | B31578  | 0.992213                       | B31578         | 0.992213                      | 0.96616                      | NO                    |
| 31640-2                     | B31640  | 0.877962                       | B31640         | 0.877962                      | 0.996998                     | Yes                   |

**E**

Genome-wide copy number variation of human diploid blastocyst

| Androgenetic Diploid Embryo | Copy number variation                                        |
|-----------------------------|--------------------------------------------------------------|
| 31682#1                     | Arr [h19] 46,XX                                              |
| 30323-4                     | Arr [h19] 46,XX                                              |
| 31579-1                     | Arr [h19] 46,XY                                              |
| 31640-3                     | Arr [h19] 46,XY                                              |
| 31572-2                     | Arr [h19] 48,XY , +2 , +5                                    |
| 30400-1                     | Arr [h19] 46,XY                                              |
| 08822-1                     | Arr [h19] 46,XY , del ( 1 ) (q41 → q44)                      |
| 30931-3                     | Arr [h19] 46,XY                                              |
| 30931-2                     | Arr [h19] 38,XY,-5,-6,-7,-13,-19,-20,-21                     |
| 14822-1                     | Arr [h19] 46,XY,patialy UPD                                  |
| 27250#1                     | Arr [h19] 46,XX(upd)(Genome-wide UPD all chromosome)         |
| 27250#2                     | Arr [h19] 46,XX(upd)(Genome-wide UPD all chromosome)         |
| 31640-2                     | Arr [h19] 34,XX,-1,-3,-5,-10,-11,-13,-15,-16,-18,-20,-21,-22 |

## Figure S1. Generation of human diploid parthenogenetic and AG embryos

A. Haploid AG embryos after removal of the female pronucleus. B. After ICSI, pronuclear formation of the biparental embryos. After ICSI for 5-6 h, the pronucleus appeared in more than 80% of the embryos. C. The rate of sex and chromosomal euploidy of human AG embryos. D. Genetic identification of the parental-child relationship for donor gametes and diploid embryos. E. The copy number variation of the human diploid AG embryos produced in our study

# Figure S2

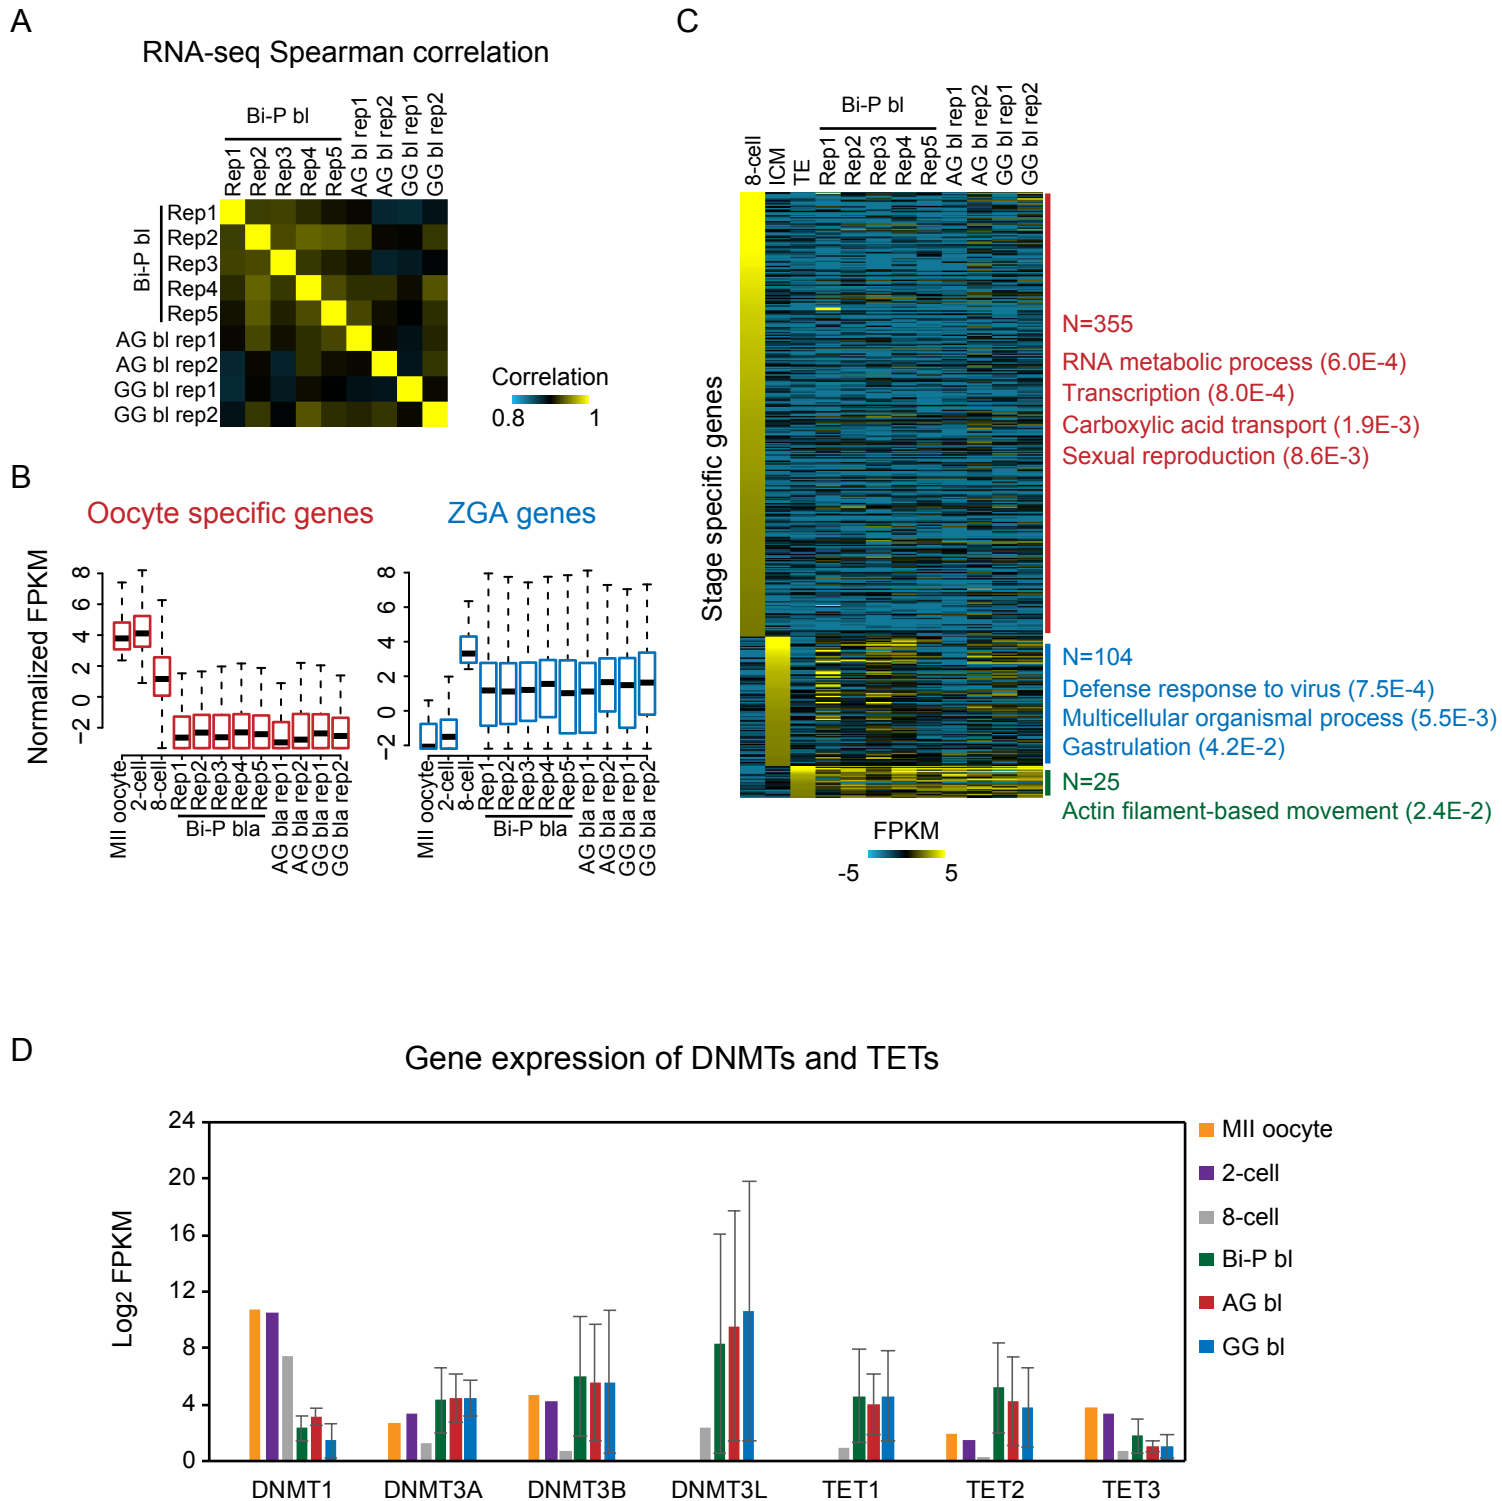

## Figure S2. RNA-Seq analysis of human uniparental and Bi-P blastocysts

A. Spearman correlation of gene expression among AG, GG and Bi-P replicates. B. Oocyte specific and ZGA-related gene expression in MII oocyte, 2-cell, 8-cell, Bi-P, AG and GG blastocysts. C. Heatmap showing the expression of stage specific genes in 8-cell, ICM, TE, Bi-P, AG and GG blastocysts. The GO terms are also listed. For the identification of the stage-specifically expressed genes in the 8-cell, ICM and TE groups, the Shannon entropy-based method was used as previously described (Wu et al. 2018). Maternally expressed genes (FPKM $\geq$ 1 in GV or MII oocytes) were first removed. For the remaining genes, only the genes with entropy scores less than 2 and FPKM greater than 10 in the expressed stage but not in other stages were selected as stage-specific genes. D. Gene expression of DNA methylation-related enzymes.

# Figure S3

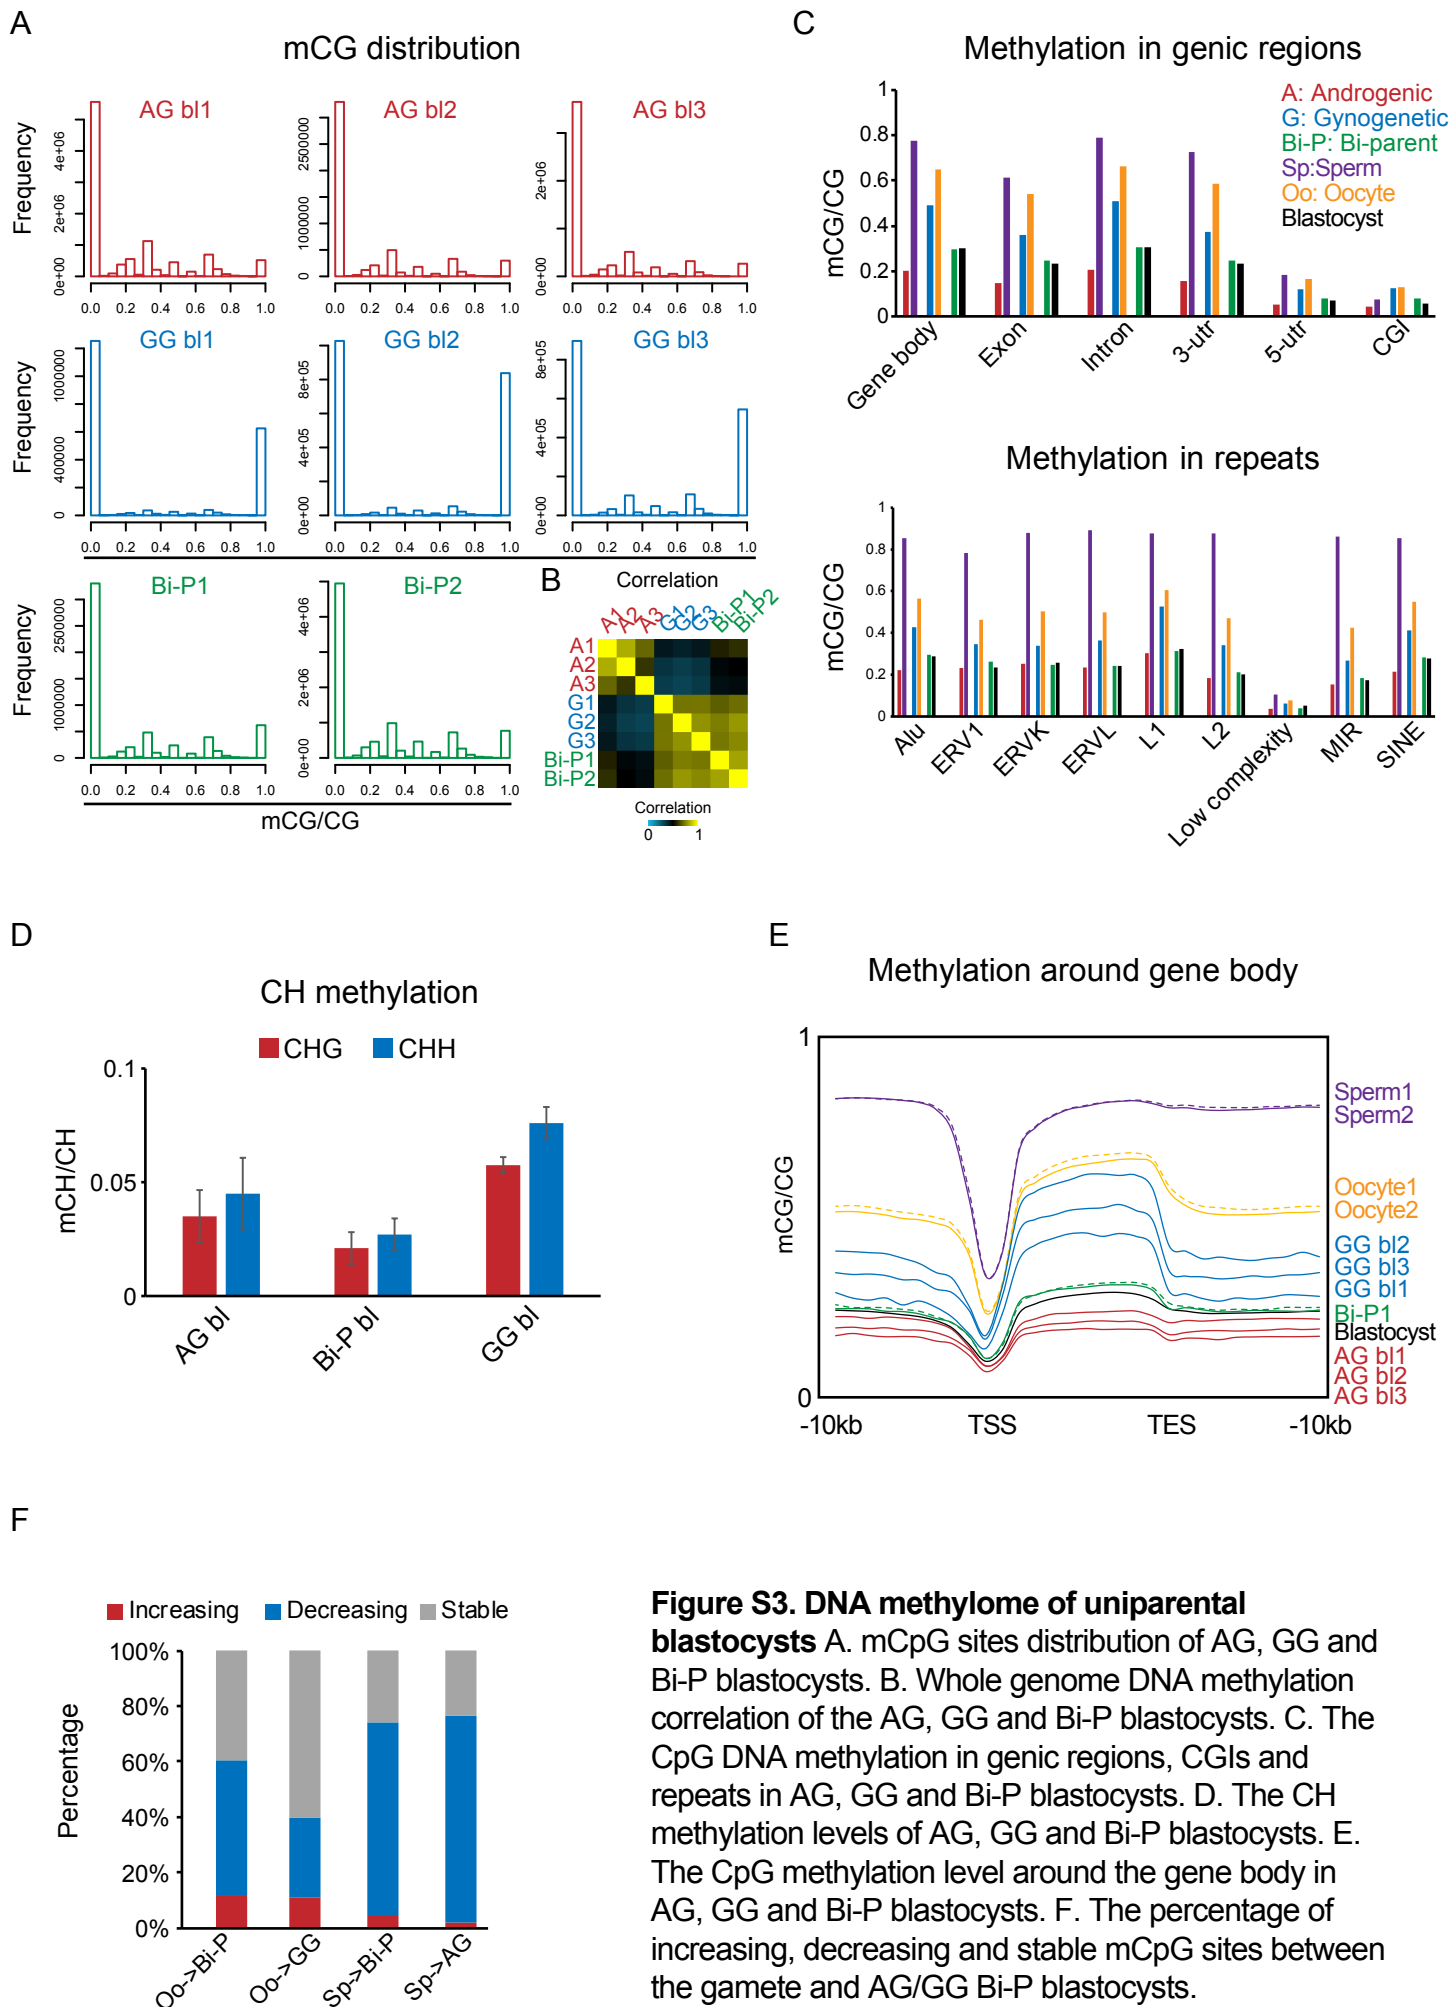

**Figure S3. DNA methylome of uniparental blastocysts** A. mCpG sites distribution of AG, GG and Bi-P blastocysts. B. Whole genome DNA methylation correlation of the AG, GG and Bi-P blastocysts. C. The CpG DNA methylation in genic regions, CGIs and repeats in AG, GG and Bi-P blastocysts. D. The CH methylation levels of AG, GG and Bi-P blastocysts. E. The CpG methylation level around the gene body in AG, GG and Bi-P blastocysts. F. The percentage of increasing, decreasing and stable mCpG sites between the gamete and AG/GG Bi-P blastocysts.

# Figure S4

DNA methylation in known imprinted DMRs (with replicates)

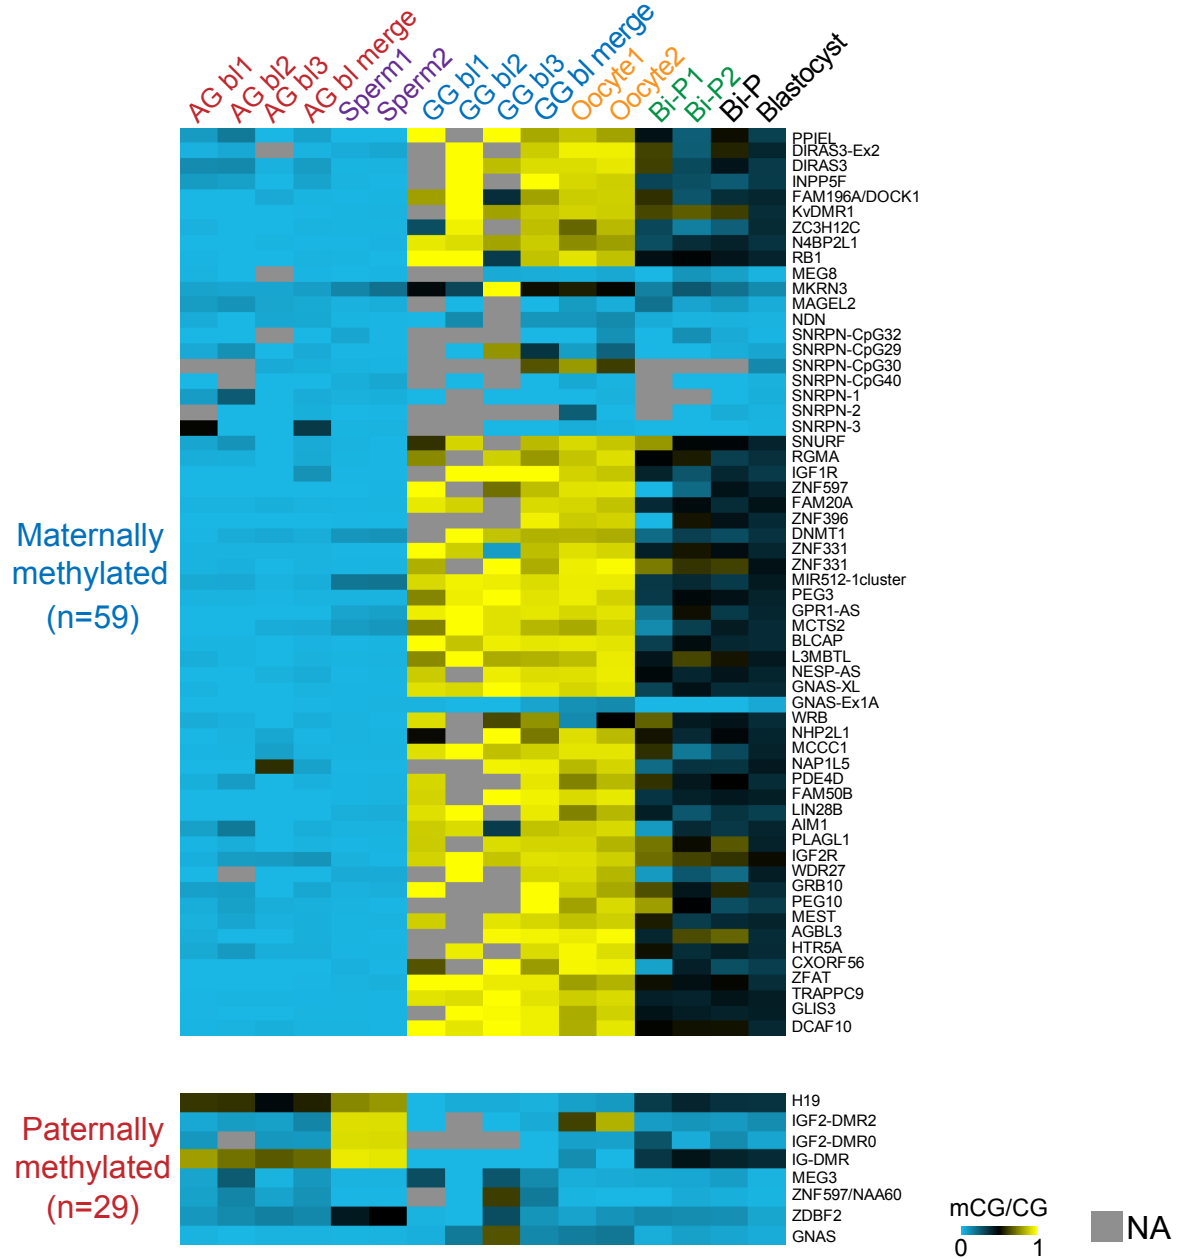

**Figure S4. Heatmap of DNA methylation in known imprinted DMRs of each blastocyst**  
Heatmap showing the DNA methylation levels in known imprinted regions. Here, we showed the DNA methylation for each replicate in AG, GG, and Bi-P blastocysts for validation.

Figure S5

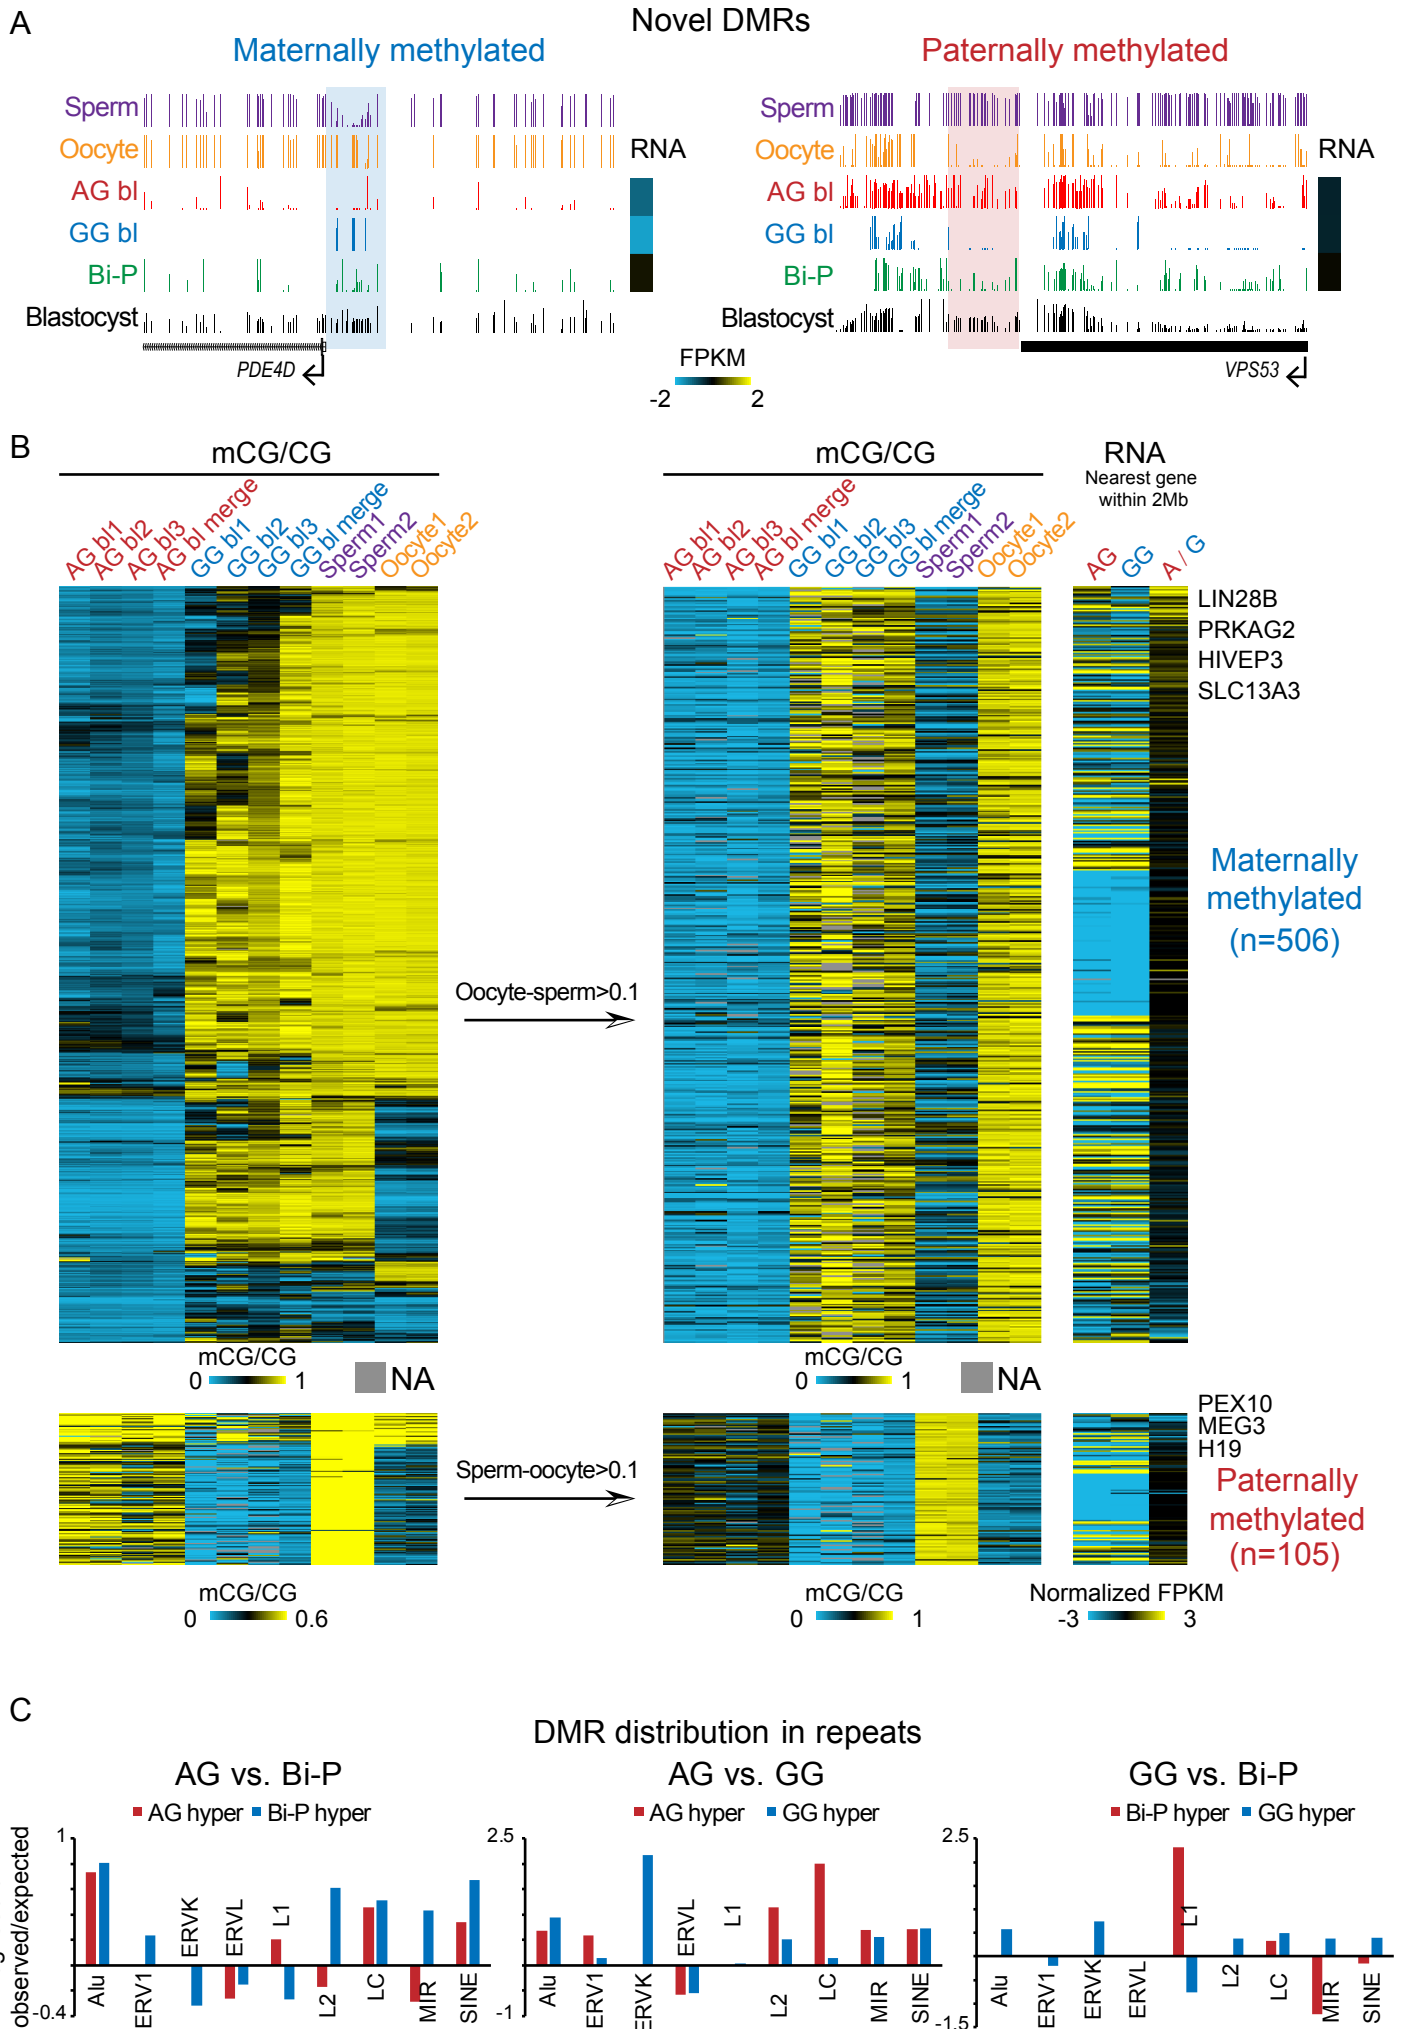

### **Figure S5. Putative DNA methylation in DMRs**

A. UCSC snapshot of putative maternal and paternal imprinted DMRs around PDE4D and VPS53. B. Heatmaps showing the DNA methylation levels for newly identified DMRs and the related gene expression. DNA methylation in 2, 4, and 8-cell embryos published previously was included as a control. The DMRs were firstly identified based on a pairwise comparison between AG and GG blastocysts as previously described (Zhang et al. 2018). Only those DMRs with changes in CG methylation levels between sperm and oocytes greater than 0.1 (for example, for maternal DMRs, the oocyte showed higher methylation levels than the sperm.) were taken as allelic putative DMRs. Here, the indicated genes are those nearest to the DMR in the 2 Mb region. C. The distribution of differential methylation regions (DMRs) in repeats.

# Figure S6

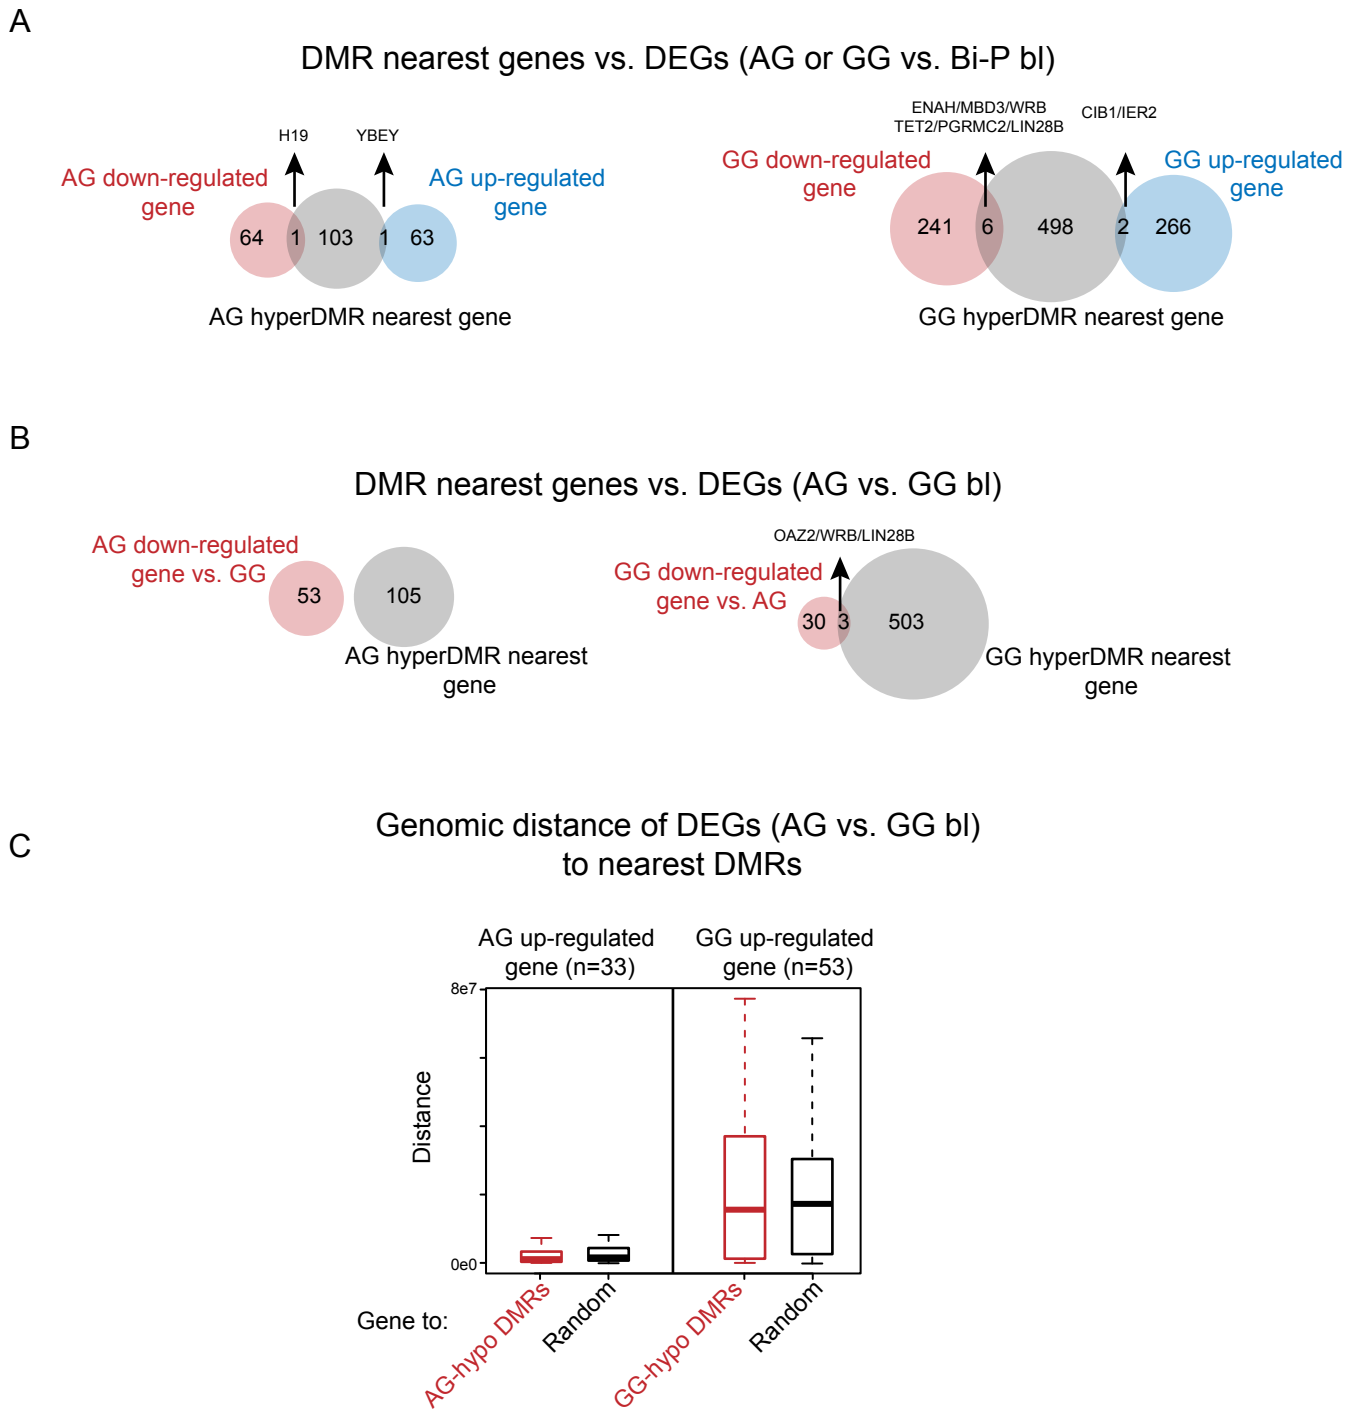

## Figure S6. Relationship between novel identified DMRs and gene expression

A. DMRs between uniparental and Bi-P blastocysts overlapped with the DEGs. B. DMRs between the AG and GG blastocysts overlapped with the DEGs. C. Genomic distance of DEGs (AG vs. GG blastocysts) to DMRs. Random regions with the same length to each DMR were generated and used as controls.
