# Supplementary material for: Parental methylome reprogramming in human uniparental blastocysts reveals germline memory transition
Source: HighWire-hosted journal article supplement (doi:10.1101/gr.273318.120), 2021-07-30
Supplement: Supplemental_Table_S1.docx [file Supplemental_Table_S1.docx]

**Supplementary table 1. Development of androgenetic, parthenogenetic, and bi-parental embryos**

|  | **No. of MII oocytes** | **No. of fertilized embryos** | **No. of fused androgenetic diploid embryos** | **No. of 2-cell embryos** | **No. of 8-cell embryos** | **No. of compact embryos or morula** | **No. of blastocyst** |
| --- | --- | --- | --- | --- | --- | --- | --- |
| Androgenetic embryos | 105 | 83 | 36# | 36 | 33 | 31 | 18 |
| Parthenogenetic embryos | 23 | 23 | / | 19 | 10 | 10 | 4 |
| Bi-parental embryos | 15 | 12 | / | 9 | 9 | 9 | 7 |

# “fused androgenetic diploid embryos” refers to the fusion of a male pronuclear from a haploid androgenetic zygote in which female pronuclear has been removed into another haploid androgenetic zygote in which the female pronuclei have also been removed to form a diploid androgenetic zygote. In other words, a diploid androgenetic embryo actually comes from two haploid androgenetic embryos which female pronucleus have been removed.
