# Supplementary material for: Parental methylome reprogramming in human uniparental blastocysts reveals germline memory transition
Source: HighWire-hosted journal article supplement (doi:10.1101/gr.273318.120), 2021-07-30
Supplement: Supplemental_Table_S2.xlsx [file Supplemental_Table_S2.xlsx]

## Sheet: h_BiPbla_2foldless_AG_pad005
Supplementary Table 2. The expression of upregulated gene in AG compared with that of Bi-P blastocyst.
DEseq2 result								FPKM (replicates merged )
Gene	baseMean	log2FoldChange	lfcSE	stat	pvalue	padj	Gene	Bi-P bla	AG bla	GG bla
CATSPER4	58.4421	6.77909	0.699347	9.69345	3.2148e-22	4.39206e-18	CATSPER4	0	6.84977	0
LOC102546229	117.315	2.73431	0.555972	4.91807	8.74012e-07	0.000361841	LOC102546229	4.09502	30.0641	1.01846
ANXA2P1	69.4063	3.07354	0.644756	4.76698	1.87011e-06	0.000608321	ANXA2P1	1.37244	17.944	24.8969
LOC441601	452.201	1.91897	0.40914	4.69025	2.72865e-06	0.000730958	LOC441601	13.067	57.942	24.6706
BAIAP2L2	82.5721	3.3694	0.748483	4.50163	6.74334e-06	0.00143949	BAIAP2L2	0.411367	6.94796	0.863618
ARL4D	817.748	2.26345	0.521127	4.34338	1.40305e-05	0.00260037	ARL4D	15.6016	78.9335	89.8841
SPTSSA	4871.33	2.2471	0.519872	4.32241	1.54336e-05	0.00281139	SPTSSA	55.0735	272.583	132.943
TMEM120A	241.481	1.63524	0.383385	4.26526	1.99668e-05	0.00340982	TMEM120A	5.81967	20.1455	3.97081
TMBIM1	209.636	2.47073	0.580092	4.2592	2.05156e-05	0.00346029	TMBIM1	2.14075	14.8787	6.44143
THAP3	123.231	1.91799	0.464748	4.12696	3.67597e-05	0.00523137	THAP3	3.60114	13.1823	0.198843
KNSTRN	2012.22	1.80495	0.442715	4.077	4.56204e-05	0.00617096	KNSTRN	44.2189	151.852	138.738
AGPAT2	715.386	1.83506	0.456004	4.02423	5.71631e-05	0.00729872	AGPAT2	19.0432	65.8114	44.3746
TOP1MT	270.848	1.70334	0.424201	4.01541	5.93437e-05	0.00750697	TOP1MT	5.17501	18.1088	5.82258
PLPP2	59.2177	3.17033	0.79097	4.00816	6.11944e-05	0.0075696	PLPP2	0.445679	9.20443	0.764728
LMBR1L	134.12	2.14075	0.544334	3.9328	8.39634e-05	0.00922242	LMBR1L	1.25843	7.89639	3.73475
QTRT1	77.25	2.29606	0.584284	3.92969	8.50553e-05	0.00922242	QTRT1	1.60993	9.75701	11.5559
EIF5AL1	657.021	2.15544	0.550986	3.91197	9.15458e-05	0.00954732	EIF5AL1	6.83363	40.3735	17.8273
UBE2I	2628.65	1.78211	0.457938	3.89161	9.95827e-05	0.0100313	UBE2I	31.1285	123.552	116.261
MPV17L2	959.424	1.84768	0.477255	3.87148	0.000108177	0.0104419	MPV17L2	29.4068	100.823	74.6764
PIPSL	337.876	1.76216	0.469693	3.75172	0.000175626	0.0141526	PIPSL	3.55927	12.1396	22.3994
AAGAB	587.804	1.69536	0.453758	3.73627	0.000186773	0.0147497	AAGAB	7.03774	22.1178	35.4171
DUSP14	1194.04	1.68833	0.456504	3.6984	0.000216963	0.0165595	DUSP14	31.0232	102.847	67.6635
C8orf37-AS1	23.8706	2.91261	0.791627	3.67927	0.000233901	0.0174125	C8orf37-AS1	0.67999	7.66848	1.52549
TRAPPC3	1000.05	1.30627	0.355144	3.67813	0.000234953	0.0174125	TRAPPC3	38.8447	94.4278	78.051
MTFR1L	417.884	1.65835	0.454117	3.6518	0.000260404	0.0187244	MTFR1L	9.86552	34.9353	31.0551
RPUSD3	1387.07	1.65371	0.453573	3.64596	0.000266395	0.0190549	RPUSD3	46.3381	142.829	81.1012
ZNF350	453.399	2.13754	0.586896	3.64211	0.000270413	0.0192416	ZNF350	5.86446	26.8858	12.4328
ARFRP1	305.907	1.28419	0.355144	3.61596	0.000299236	0.0207521	ARFRP1	5.50797	13.1897	11.9155
STEAP1	176.888	2.52677	0.702406	3.59731	0.00032152	0.0215324	STEAP1	3.17364	23.9808	12.1054
ABHD12B	404.341	1.7493	0.486724	3.59403	0.0003256	0.0216993	ABHD12B	9.91387	34.1371	13.3631
ANP32AP1	36.9489	1.92782	0.538498	3.57999	0.000343613	0.0225136	ANP32AP1	10.9457	21.9777	11.0205
PAAF1	390.202	1.91529	0.538098	3.55936	0.000371758	0.0236231	PAAF1	8.77066	33.8223	36.6519
PDCL3P4	2403.38	2.06691	0.582802	3.54651	0.000390373	0.0244645	PDCL3P4	79.9165	364.265	375.066
PMM2	794.31	1.30937	0.369765	3.5411	0.000398462	0.0248575	PMM2	14.8043	36.8855	28.2896
LEO1	867.242	1.5994	0.452154	3.53728	0.000404264	0.0249912	LEO1	16.8527	50.4713	49.439
ATG3	4705.72	1.91787	0.543266	3.53025	0.000415162	0.0255493	ATG3	109.062	428.508	335.526
GPCPD1	1710.73	1.97424	0.560484	3.52238	0.000427688	0.0260852	GPCPD1	8.01696	32.8115	33.522
SDHC	620.499	1.63768	0.4676	3.50231	0.000461235	0.0276377	SDHC	9.45777	33.6872	31.8007
CNN3	3488.78	1.71215	0.490394	3.49137	0.000480554	0.0281774	CNN3	69.7204	214.508	262.824
YWHAEP1	80.4887	2.06504	0.591982	3.48835	0.00048602	0.0282553	YWHAEP1	1.5773	7.69906	21.9226
MTMR14	374.97	1.93884	0.558303	3.47274	0.000515178	0.0291314	MTMR14	5.17625	21.0569	15.0074
GLUL	2685.45	1.36077	0.392004	3.47131	0.000517926	0.0291314	GLUL	14.2605	35.3835	31.913
BAK1	202.038	1.88004	0.541611	3.47119	0.000518148	0.0291314	BAK1	3.58193	14.3529	15.2644
UBE2MP1	179.486	1.80673	0.52095	3.46813	0.000524087	0.0292569	UBE2MP1	8.00414	31.2942	20.5016
DNAJC11	411.47	1.75909	0.51359	3.42509	0.000614599	0.0323601	DNAJC11	9.27371	22.9421	26.5868
SLC25A38	545.695	1.42315	0.415835	3.42239	0.000620728	0.0323601	SLC25A38	9.97045	26.9013	20.9796
TMEM45B	306.154	2.07639	0.607066	3.42037	0.000625353	0.032362	TMEM45B	3.07603	17.5957	6.57451
PLLP	120.692	2.2405	0.656001	3.41538	0.000636925	0.0326795	PLLP	1.97878	12.5302	4.58608
PRSS3	31.4856	2.74115	0.802764	3.41464	0.000638664	0.0326795	PRSS3	0.377815	8.3374	4.77118
UBE2NL	80.6513	1.86888	0.54877	3.40557	0.000660255	0.0334089	UBE2NL	1.12024	10.222	13.3818
RNF146	180.751	1.69715	0.499147	3.40011	0.000673592	0.0337157	RNF146	3.02379	10.0786	8.17687
METTL1	984.35	1.69233	0.499157	3.39037	0.000697973	0.0345497	METTL1	34.0126	103.803	63.3667
TEAD4	730.664	1.44002	0.425363	3.38538	0.000710808	0.035058	TEAD4	18.265	49.111	51.0952
HYLS1	1172.1	1.74551	0.519905	3.35737	0.000786876	0.0374575	HYLS1	25.0144	80.6366	62.6959
STMN1	29096	1.37806	0.417118	3.30376	0.000953978	0.0431565	STMN1	925.672	2263.16	1898.66
PRKAG1	591.103	1.33588	0.405269	3.29629	0.000979705	0.0436689	PRKAG1	16.0764	40.2015	40.5409
WDR11-AS1	185.828	2.39525	0.726749	3.29584	0.000981288	0.0436689	WDR11-AS1	1.46638	10.8963	5.67985
POU5F1P4	31.1097	2.08679	0.634703	3.28781	0.00100968	0.0443546	POU5F1P4	1.76245	7.16807	18.5334
KRTCAP3	184.119	1.96317	0.600701	3.26814	0.00108258	0.0456486	KRTCAP3	6.4864	33.7302	13.1982
YBEY	420.951	1.2125	0.371879	3.26047	0.00111229	0.0464713	YBEY	33.0814	75.6707	36.9415
HDAC3	463.721	1.24879	0.385563	3.23887	0.00120004	0.0487063	HDAC3	10.8116	26.3126	28.5345
TMEM134	121.668	1.50143	0.463614	3.23854	0.00120144	0.0487063	TMEM134	6.67865	17.6906	11.1911
ACTR8	298.151	1.54036	0.476094	3.23541	0.00121467	0.0490971	ACTR8	3.16775	9.31941	11.3613
ISOC2	635.006	1.85558	0.574708	3.22873	0.00124341	0.0499631	ISOC2	23.9946	107.817	44.7929

## Sheet: h_BiPbla_2foldmore_AG_pad005
Supplementary Table 2. The expression of downregulated gene in AG compared with that of Bi-P blastocyst.
DEseq2 result								FPKM (replicates merged )
Gene	baseMean	log2FoldChange	lfcSE	stat	pvalue	padj	Gene	Bi-P bla	AG bla	GG bla
FABP7	1827.48	-4.19966	0.570612	-7.35993	1.84013e-13	1.25699e-09	FABP7	170.483	6.67429	8.80802
HSPA1A	397.482	-3.96974	0.544319	-7.29305	3.03024e-13	1.37997e-09	HSPA1A	19.4567	1.05323	2.31786
MIR548XHG	88.098	-4.73119	0.714067	-6.62569	3.45637e-11	1.18052e-07	MIR548XHG	7.45686	0	15.3071
TNFAIP8	677.734	-2.75075	0.422878	-6.50484	7.77757e-11	1.77095e-07	TNFAIP8	29.2682	3.51471	8.36796
LCP1	1377.17	-3.67776	0.588262	-6.25191	4.05453e-10	7.91329e-07	LCP1	31.4037	1.40442	36.4807
HAND1	473.656	-3.95066	0.707637	-5.58289	2.36549e-08	2.31597e-05	HAND1	27.5033	0.49903	24.3618
LOC644919	41.8562	-3.29764	0.603377	-5.4653	4.62115e-08	4.07543e-05	LOC644919	7.64701	0.522795	7.35176
SIAH2	247.256	-3.31684	0.607527	-5.45957	4.77287e-08	4.07543e-05	SIAH2	7.54633	0.455435	4.45591
PITX2	114.187	-3.5324	0.681954	-5.17982	2.22099e-07	0.000137923	PITX2	5.09559	0.204116	0.859831
B2M	501.462	-2.82124	0.559641	-5.04117	4.62702e-07	0.000234127	B2M	54.525	5.11736	57.773
TMEM123	1530.96	-2.51082	0.51313	-4.89314	9.92375e-07	0.000387367	TMEM123	35.0951	5.03718	10.3811
OR51B5	225.241	-3.12395	0.640807	-4.87503	1.08793e-06	0.000406505	OR51B5	19.0473	1.39581	7.17912
CALB2	69.105	-3.47036	0.717967	-4.8336	1.34087e-06	0.000473203	CALB2	5.10966	0.145749	3.624
CHML	1057.44	-2.30765	0.477564	-4.83213	1.35082e-06	0.000473203	CHML	11.7261	1.95865	4.13447
PRTG	816.912	-2.86766	0.607965	-4.71682	2.39556e-06	0.000714969	PRTG	5.04728	0.475375	1.34373
SNAR-C4	107.694	-3.64429	0.773497	-4.71145	2.45964e-06	0.000714969	SNAR-C4	60344.2	14541.4	1244820
GALNT7	297.997	-2.15398	0.457933	-4.7037	2.55493e-06	0.000717575	GALNT7	5.40518	1.04841	1.91424
IFITM1	2042.94	-2.57491	0.547596	-4.70221	2.57365e-06	0.000717575	IFITM1	420.646	52.6297	138.088
RMRP	63.5077	-2.82849	0.602412	-4.69528	2.66241e-06	0.000727478	RMRP	101.33	8.1132	2.79715
SMAD7	282.815	-3.03296	0.647586	-4.68349	2.8203e-06	0.00074098	SMAD7	10.1042	0.744113	1.3406
B4GALT6	428.853	-2.10081	0.456488	-4.60212	4.18214e-06	0.000998936	B4GALT6	7.01295	1.36537	1.35703
RPPH1	87.8758	-2.91345	0.633957	-4.59565	4.31395e-06	0.000998936	RPPH1	64.1895	4.46277	1.62751
LGALS1	318.274	-2.63153	0.594529	-4.42624	9.58887e-06	0.00192652	LGALS1	72.7376	7.88091	10.7937
MTRNR2L2	4417.1	-2.10951	0.481291	-4.38303	1.1704e-05	0.00228429	MTRNR2L2	760.181	260.74	151.024
SLC11A2	1254.93	-1.89342	0.435784	-4.34487	1.3936e-05	0.00260037	SLC11A2	24.8365	5.64123	10.9495
MTRNR2L9	1296.35	-2.04443	0.470791	-4.34253	1.40849e-05	0.00260037	MTRNR2L9	1123.14	240.461	89.8529
HSPA1B	525.014	-2.72792	0.650849	-4.19133	2.77319e-05	0.00430538	HSPA1B	21.6842	2.14483	1.81315
MTRNR2L8	5273.81	-1.99181	0.486545	-4.09378	4.24392e-05	0.00591637	MTRNR2L8	344.913	77.4593	38.0553
SETD7	426.453	-2.27111	0.556133	-4.08375	4.43146e-05	0.00605426	SETD7	6.37159	1.15405	1.52895
CHM	480.532	-1.71633	0.428336	-4.00698	6.15009e-05	0.0075696	CHM	9.26184	2.8286	7.05152
TCTEX1D2	54.5472	-2.08052	0.528273	-3.93834	8.20466e-05	0.00911317	TCTEX1D2	11.1403	2.95372	8.03963
MMD	272.617	-1.96881	0.504952	-3.89901	9.6585e-05	0.00984735	MMD	7.93319	1.72425	0.845105
MSX1	148.035	-2.9172	0.750086	-3.88916	0.000100592	0.0100313	MSX1	7.45514	0.29403	1.29969
FCER1G	33.3702	-2.8471	0.737479	-3.86059	0.000113116	0.0106578	FCER1G	6.56083	0.3815	0.947202
GDF3	189.828	-2.4696	0.650753	-3.79499	0.00014765	0.0127671	GDF3	16.35	1.39931	2.12258
TUSC3	409.384	-2.07008	0.546756	-3.78611	0.000153023	0.0130663	TUSC3	8.62819	1.59544	4.44269
LOC101928894	54.9597	-2.4363	0.648517	-3.75672	0.000172153	0.0140836	LOC101928894	6.46857	0.710623	5.83008
LINC01420	89.5247	-1.95657	0.521608	-3.75104	0.000176105	0.0141526	LINC01420	19.1812	2.74025	11.3108
STS	2284.72	-2.22558	0.595101	-3.73984	0.000184136	0.0146849	STS	27.6055	4.61823	13.5437
H19	27.1989	-3.00116	0.805946	-3.72378	0.000196264	0.0153034	H19	18.1862	0.0827175	1.2204
SMARCA2	395.952	-2.36198	0.634489	-3.72265	0.000197146	0.0153034	SMARCA2	14.9884	2.08554	2.4159
LGALS2	61.8932	-2.8587	0.776798	-3.68011	0.000233135	0.0174125	LGALS2	15.3128	0.460551	4.39505
TKTL1	495.942	-2.61897	0.722019	-3.62728	0.00028642	0.0201705	TKTL1	19.2658	1.24753	74.6537
AIDA	245.328	-1.40143	0.387295	-3.6185	0.000296319	0.0206547	AIDA	15.2732	6.54229	6.4326
DACT1	260.246	-2.43305	0.687817	-3.53735	0.000404158	0.0249912	DACT1	5.92729	0.633655	2.69264
HSPH1	3798.73	-1.70245	0.482993	-3.52478	0.00042383	0.0259657	HSPH1	54.9172	15.1846	37.8076
GNA12	330.339	-2.39928	0.683296	-3.51133	0.000445872	0.0269536	GNA12	5.47799	0.659105	1.7712
SLC16A10	269.332	-1.3829	0.397327	-3.48051	0.000500456	0.0288265	SLC16A10	6.99753	2.50736	5.03279
PID1	205.534	-2.40412	0.693987	-3.46421	0.000531784	0.0295335	PID1	5.92116	0.703142	2.70667
NEAT1	4849.28	-1.62355	0.470053	-3.45399	0.000552366	0.0305283	NEAT1	15.0508	4.36595	4.13669
DLX5	164.551	-1.78814	0.517997	-3.45202	0.000556401	0.0305283	DLX5	10.8185	2.35536	11.5956
PRKAR2B	298.787	-1.60645	0.467444	-3.43668	0.000588901	0.0318007	PRKAR2B	6.7048	1.83974	3.89829
LINC00379	68.7569	-2.67801	0.781177	-3.42817	0.000607666	0.0323333	LINC00379	6.74048	0.326559	0.0674311
FSTL1	293.818	-2.0146	0.587705	-3.42792	0.000608231	0.0323333	FSTL1	6.27238	1.18383	2.0172
MALAT1	44828.3	-1.24481	0.363615	-3.42341	0.000618397	0.0323601	MALAT1	375.036	142.749	157.526
TINCR	607.844	-1.89531	0.560929	-3.37888	0.000727826	0.0357682	TINCR	9.23241	2.41594	4.06904
PKIA	347.785	-2.42802	0.721821	-3.36375	0.000768925	0.0370223	PKIA	6.39901	0.654262	0.274886
SLPI	124.504	-2.14808	0.645137	-3.32964	0.00086957	0.0404035	SLPI	27.1428	4.14007	7.54091
JADE3	376.753	-1.59358	0.478733	-3.32873	0.000872423	0.0404035	JADE3	5.9181	1.75223	2.68636
UBQLN2	394.701	-1.21941	0.369918	-3.29643	0.000979221	0.0436689	UBQLN2	8.63574	3.44262	10.7748
NUPR1	64.1237	-2.40255	0.732527	-3.27982	0.00103875	0.0448145	NUPR1	6.95463	0.706434	2.98743
TYRO3	333.597	-1.69753	0.518748	-3.27236	0.00106654	0.0453868	TYRO3	6.08117	1.70245	2.60005
EIF1AX	4829.84	-1.45937	0.449437	-3.24711	0.00116584	0.0482658	EIF1AX	133.007	59.7005	91.8256
PPP1R14D	79.9857	-2.18243	0.67303	-3.24269	0.00118405	0.0485781	PPP1R14D	9.28137	1.10302	7.20176
STON2	921.916	-1.55047	0.478691	-3.23898	0.00119959	0.0487063	STON2	11.0949	3.20534	10.7964

## Sheet: h_BiPbla_2foldless_GG_pad005
Supplementary Table 2. The expression of upregulated gene in GG compared with that of Bi-P blastocyst.
DEseq2 result								FPKM (replicates merged )
Gene	baseMean	log2FoldChange	lfcSE	stat	pvalue	padj	Gene	Bi-P bla	AG bla	GG bla
SNAR-C3	408.518	-4.25956	0.603751	-7.05516	1.72402e-12	1.4444e-09	SNAR-C3	148353	180487	756332
ARL4D	829.112	2.39204	0.417348	5.73153	9.9528e-09	4.16929e-06	ARL4D	15.6016	78.9335	89.8841
HAUS7	361.976	2.01561	0.398302	5.0605	4.1816e-07	0.000100097	HAUS7	9.81463	13.3343	40.2232
HRASLS5	135.173	2.1899	0.44132	4.96216	6.97148e-07	0.00014602	HRASLS5	9.81463	4.08702	7.15382
POU5F1P4	53.4627	2.96936	0.617317	4.8101	1.50853e-06	0.000284814	POU5F1P4	1.76245	7.16807	18.5334
H1F0	348.523	2.36201	0.506287	4.66536	3.08076e-06	0.00051622	H1F0	4.16916	3.87956	26.7061
RNASET2	218.814	1.96424	0.422376	4.65044	3.3122e-06	0.000541464	RNASET2	6.53127	15.966	31.6761
RHOV	172.072	1.81781	0.392399	4.63257	3.61156e-06	0.000579752	RHOV	3.91572	7.02877	13.3412
PIPSL	420.552	2.20035	0.479996	4.58409	4.55957e-06	0.000694558	PIPSL	3.55927	12.1396	22.3994
IMPDH1	938.029	2.03528	0.447518	4.54794	5.41737e-06	0.000772551	IMPDH1	13.0063	28.9973	63.2031
SLC9A3R2	69.6893	2.5749	0.575899	4.4711	7.78192e-06	0.00102271	SLC9A3R2	0.766494	1.59412	5.68351
ADORA2B	165.59	1.96968	0.446397	4.4124	1.02231e-05	0.00128075	ADORA2B	2.99071	9.85521	11.4339
ABHD11	648.518	1.71096	0.38882	4.40041	1.08049e-05	0.00131672	ABHD11	18.5067	37.5739	58.8999
GPD1L	229.292	1.7695	0.402798	4.39303	1.11782e-05	0.00134995	GPD1L	2.01571	3.75062	7.93767
DECR2	1222.4	1.86027	0.432865	4.29759	1.72669e-05	0.00183935	DECR2	29.0741	26.144	100.544
TMEM8A	217.788	1.88231	0.441379	4.2646	2.00261e-05	0.00198852	TMEM8A	2.06603	0.823384	8.66621
ANXA2P1	64.8478	2.87587	0.676832	4.24901	2.14715e-05	0.00204132	ANXA2P1	1.37244	17.944	24.8969
PPP1R15A	184.583	2.13464	0.506455	4.21486	2.49933e-05	0.00220594	PPP1R15A	2.30202	6.66142	13.8177
GPCPD1	1393.64	1.67602	0.403657	4.15208	3.29469e-05	0.00268905	GPCPD1	8.01696	32.8115	33.522
REEP6	74.6371	2.38757	0.575749	4.1469	3.37003e-05	0.00270511	REEP6	1.397	2.54472	6.30389
ATG3	3721.03	1.53079	0.370759	4.12878	3.64685e-05	0.00283502	ATG3	109.062	428.508	335.526
ALKBH3	117.17	1.72425	0.418276	4.12228	3.75138e-05	0.00289007	ALKBH3	2.6604	4.49401	11.656
FAM50A	1040.82	1.65612	0.403722	4.10214	4.09354e-05	0.00311122	FAM50A	34.0822	36.8421	95.6569
TCEAL4	85.0249	1.83072	0.447322	4.09264	4.26497e-05	0.00317622	TCEAL4	2.5902	3.76779	11.8382
LINC01160	185.982	2.4473	0.602948	4.05889	4.93057e-05	0.00346043	LINC01160	2.85697	6.00864	13.3011
PRKCD	97.7056	1.98675	0.491074	4.04572	5.21616e-05	0.00352813	PRKCD	1.23922	2.73479	5.0873
GLTPD2	164.267	2.31328	0.573899	4.03081	5.55846e-05	0.00368867	GLTPD2	3.00593	5.63652	11.5398
AMT	177.45	1.70497	0.423854	4.02255	5.75713e-05	0.00374633	AMT	3.29742	3.71779	11.8076
CNN3	3335.3	1.66556	0.4156	4.00761	6.13354e-05	0.00395289	CNN3	69.7204	214.508	262.824
EFHD2	1466.78	1.77991	0.44448	4.00448	6.21535e-05	0.00398645	EFHD2	22.0567	31.3883	55.7189
PMPCA	686.541	1.41355	0.353642	3.99711	6.41192e-05	0.00401644	PMPCA	13.1419	22.6347	40.4059
PREB	868.742	1.75507	0.440538	3.98392	6.77867e-05	0.00420685	PREB	15.4129	32.51	63.7982
ZNF428	156.869	1.82215	0.458187	3.97688	6.98268e-05	0.0042937	ZNF428	5.44112	13.6315	19.1895
WDR66	364.917	2.17085	0.546919	3.96924	7.21028e-05	0.00439335	WDR66	2.97468	12.2583	12.6862
NSFL1C	759.867	1.64139	0.414219	3.96262	7.41307e-05	0.00447622	NSFL1C	8.33308	16.9772	29.1808
GADD45B	153.93	1.80908	0.459431	3.93766	8.22802e-05	0.00492395	GADD45B	4.61011	4.57095	19.0404
ORAI1	500.614	1.62291	0.412632	3.93307	8.38665e-05	0.00492934	ORAI1	14.7731	23.8455	38.5992
NDUFV1	2616.65	1.82051	0.463154	3.93068	8.47043e-05	0.00492934	NDUFV1	64.6567	126.989	225.065
PRR13	8501.7	1.75183	0.445828	3.92938	8.51658e-05	0.00492934	PRR13	382.533	916.595	1239.88
KNSTRN	1700.48	1.45335	0.3699	3.92903	8.52894e-05	0.00492934	KNSTRN	44.2189	151.852	138.738
MYC	1501.69	1.44739	0.370624	3.90527	9.41186e-05	0.0052351	MYC	26.728	24.532	88.0776
YWHAEP1	123.385	2.60398	0.669124	3.89163	9.95734e-05	0.0054908	YWHAEP1	1.5773	7.69906	21.9226
SNX8	1305.28	1.98815	0.511446	3.88732	0.000101359	0.00554576	SNX8	8.96485	23.564	35.871
ROGDI	244.812	1.64874	0.424834	3.88089	0.000104073	0.00561075	ROGDI	5.46756	10.495	17.3103
PPCDC	175.542	1.65966	0.427766	3.87983	0.000104531	0.00561075	PPCDC	3.23337	3.64738	9.64228
PSMD4	2420.27	1.34187	0.34821	3.85362	0.000116384	0.00606037	PSMD4	89.3692	165.737	249.382
PLIN3	332.057	1.59221	0.415168	3.8351	0.000125511	0.00642167	PLIN3	5.80868	8.11916	18.0694
TFIP11	358.439	1.72974	0.451519	3.83094	0.000127655	0.00648188	TFIP11	4.05879	7.2534	22.0038
APOOP5	17.5063	2.72142	0.711385	3.82552	0.000130497	0.00657634	APOOP5	0.340351	2.06445	5.03691
RTKN	326.885	1.49965	0.393188	3.81408	0.000136693	0.00680084	RTKN	6.167	14.4093	15.7978
PQLC3	987.353	1.64906	0.433362	3.80526	0.000141653	0.00695559	PQLC3	23.166	51.3231	91.1619
TRUB2	627.197	1.61297	0.424908	3.79606	0.000147014	0.00711452	TRUB2	19.3591	36.1609	66.2007
RILP	175.384	2.06236	0.548647	3.75899	0.000170598	0.00802408	RILP	3.27562	7.18757	11.156
PLK1	1985.41	1.65382	0.440147	3.75743	0.000171665	0.00804603	PLK1	37.593	73.0595	133.492
CHCHD3	1907.37	1.28004	0.340853	3.7554	0.000173062	0.00806574	CHCHD3	47.4639	91.1589	141.35
EMD	340.734	1.61656	0.431538	3.74604	0.000179651	0.00824736	EMD	11.386	24.9859	41.0283
PQLC1	173.829	1.60391	0.428584	3.74234	0.000182315	0.00828526	PQLC1	2.84086	5.7428	7.67035
PAAF1	346.285	1.73164	0.463378	3.73699	0.000186239	0.00840586	PAAF1	8.77066	33.8223	36.6519
NFKB2	401.254	1.46493	0.392537	3.73196	0.000189999	0.00851396	NFKB2	5.49421	3.88589	14.884
PDE6G	52.0854	2.28006	0.611589	3.72809	0.000192936	0.00851396	PDE6G	1.67435	2.77562	10.9105
LOC101927056	25.1347	2.54848	0.683624	3.7279	0.00019308	0.00851396	LOC101927056	0.771244	0.469816	5.06283
CIB1	1066.4	1.39523	0.374595	3.72464	0.000195596	0.00856851	CIB1	61.0809	147.54	146.55
WDR11-AS1	116.297	1.96994	0.529675	3.71915	0.000199897	0.00871607	WDR11-AS1	1.46638	10.8963	5.67985
BIN1	885.355	1.69515	0.455848	3.71868	0.000200265	0.00871607	BIN1	15.4354	21.2841	44.4001
PDCL3	13016.4	1.95268	0.530392	3.68158	0.000231793	0.00956057	PDCL3	354.544	1640.94	1618.81
RPS6KA1	266.381	1.63748	0.445057	3.67926	0.000233914	0.00961845	RPS6KA1	3.38415	6.61956	13.8549
NEK6	785.023	1.45621	0.397932	3.65944	0.000252766	0.0101441	NEK6	13.4118	18.6272	37.9016
POU5F1B	57.1559	2.20599	0.60293	3.65877	0.000253424	0.0101441	POU5F1B	1.74683	7.13465	12.0587
NRBP1	1172.63	1.51354	0.414413	3.65224	0.00025996	0.0102796	NRBP1	23.4577	41.8957	70.6843
BCKDK	249.597	1.44009	0.397044	3.62703	0.000286703	0.0110688	BCKDK	5.07842	7.65699	14.8132
C16orf62	267.342	1.52237	0.419794	3.62647	0.000287324	0.0110688	C16orf62	2.66598	3.33381	8.50415
SPHK1	136.562	2.47985	0.68613	3.61426	0.000301211	0.0114383	SPHK1	1.84875	2.2026	8.21963
ACADS	215.491	1.93101	0.534817	3.6106	0.000305486	0.0115055	ACADS	4.04665	7.58416	12.6607
DNMT3L	14103.3	1.8564	0.514456	3.60846	0.000308014	0.0115055	DNMT3L	352.566	749.425	1330.42
NANOGNB	264.721	2.3576	0.656348	3.592	0.000328146	0.0119858	NANOGNB	7.01255	35.8189	31.3261
SDF4	228.277	1.43491	0.399558	3.59123	0.000329118	0.0119886	SDF4	4.69805	7.54035	15.3474
LSM4	3787.46	1.4425	0.403213	3.57752	0.000346873	0.0125035	LSM4	96.3667	155.609	213.108
PYGB	390.292	1.77033	0.496648	3.56455	0.000364481	0.0128915	PYGB	3.34642	5.58207	10.389
AP1M2	623.511	1.43525	0.404881	3.54486	0.000392816	0.0136771	AP1M2	16.2549	30.0594	47.4641
EIF5AL1	562.226	1.87184	0.528791	3.53986	0.000400345	0.0138315	EIF5AL1	6.83363	40.3735	17.8273
DNAJC11	394.403	1.69609	0.480053	3.53313	0.00041067	0.0140077	DNAJC11	9.27371	22.9421	26.5868
SEPW1	4065.59	1.64104	0.465762	3.52335	0.000426136	0.0143888	SEPW1	242.258	356.057	585.587
HEBP1	237.963	1.7713	0.505217	3.50602	0.000454861	0.0149486	HEBP1	7.72127	12.5285	23.4725
TMOD1	161.699	2.19236	0.625852	3.503	0.000460058	0.0150417	TMOD1	5.15251	6.41109	11.6506
SMARCB1	482.435	1.54535	0.441394	3.50108	0.000463383	0.0150768	SMARCB1	12.6456	32.8161	37.5583
QTRT1	70.0244	2.09854	0.599888	3.49822	0.000468378	0.0152024	QTRT1	1.60993	9.75701	11.5559
SLC2A11	110.213	1.78698	0.511736	3.49199	0.000479443	0.0154123	SLC2A11	1.47836	1.01717	6.42036
POU5F1P3	88.1179	2.29487	0.659511	3.47966	0.000502053	0.0159102	POU5F1P3	3.83193	15.1114	30.9829
ZNF280A	212.244	2.02075	0.582478	3.46923	0.000521947	0.0162714	ZNF280A	3.07639	4.73104	21.6238
FANCA	136.029	1.54496	0.445533	3.46767	0.000524996	0.0163285	FANCA	2.10681	2.11086	5.36031
PROCR	234.537	1.65713	0.479804	3.45377	0.000552805	0.0169962	PROCR	6.44255	9.75001	24.253
TRIP13	1524.08	1.33584	0.386901	3.45267	0.000555068	0.0170268	TRIP13	29.9262	54.1691	87.0706
RNF166	124.328	1.66159	0.482071	3.44679	0.000567298	0.0172441	RNF166	2.57462	4.90825	8.08623
IK	1384.62	1.31216	0.380883	3.44504	0.000570966	0.0173163	IK	25.291	54.5246	95.9913
SNUPN	438.887	1.3727	0.39864	3.44347	0.000574304	0.0173391	SNUPN	13.6177	24.7553	43.1571
FBXO18	281.276	1.34059	0.390057	3.43691	0.000588392	0.0175451	FBXO18	2.99503	4.88387	9.55309
EEFSEC	121.92	1.40504	0.408984	3.43544	0.000591599	0.0175451	EEFSEC	3.04192	4.05287	6.75938
NRBF2	2096.36	1.30503	0.379986	3.43443	0.000593801	0.0175648	NRBF2	54.5227	119.976	155.857
MTMR14	281.898	1.42809	0.415929	3.43349	0.000595858	0.0175648	MTMR14	5.17625	21.0569	15.0074
GLUD2	339.734	1.72809	0.50375	3.43044	0.000602603	0.0175989	GLUD2	6.19482	12.8968	28.2812
IDH2	286.157	1.7444	0.509986	3.42048	0.000625102	0.0181374	IDH2	6.71315	18.5148	21.4372
RAD51	1530.04	1.42432	0.416638	3.41861	0.000629411	0.0181733	RAD51	29.9719	66.5962	104.677
FASTK	283.428	1.46899	0.429758	3.41818	0.000630407	0.0181733	FASTK	6.06156	12.0246	16.7445
HARS	1316.3	1.54499	0.452696	3.41287	0.000642834	0.0184522	HARS	24.8862	52.1234	94.5289
PDCL3P4	1894.48	1.68319	0.493732	3.40913	0.00065171	0.0186384	PDCL3P4	79.9165	364.265	375.066
AIFM1	907.972	1.5304	0.449181	3.40708	0.000656608	0.0186875	AIFM1	17.1857	17.5377	62.7717
UAP1L1	169.355	1.91662	0.563353	3.40217	0.000668533	0.0188566	UAP1L1	1.69737	2.65449	5.91276
RMND5B	182.138	1.57301	0.462413	3.40174	0.000669583	0.0188566	RMND5B	3.3446	6.04869	11.5852
GKAP1	265.201	1.80838	0.532502	3.39601	0.000683751	0.0191265	GKAP1	5.26375	8.50171	15.4809
SPSB3	521.087	1.46318	0.431099	3.39407	0.000688615	0.019191	SPSB3	15.5259	22.599	34.0585
RDH13	270.549	1.46968	0.434052	3.38594	0.000709339	0.0195733	RDH13	6.33002	14.7577	17.3904
MEAF6	1108.81	1.22401	0.361639	3.38461	0.000712799	0.0195733	MEAF6	10.8253	24.3738	24.1697
RFC2	932.146	1.38601	0.409522	3.38447	0.000713164	0.0195733	RFC2	25.7231	45.3669	71.4026
NKD2	308.723	1.89225	0.559153	3.38414	0.000714023	0.0195733	NKD2	5.46542	8.44657	17.0603
RALY	1087.28	1.39206	0.411468	3.38316	0.000716557	0.0195733	RALY	10.1803	13.4165	24.9268
CCNDBP1	1678.28	1.28975	0.381807	3.378	0.000730145	0.0196538	CCNDBP1	20.783	63.8241	49.6179
CIB2	138.013	1.98838	0.588769	3.37718	0.000732343	0.0196715	CIB2	3.16787	4.46852	10.7508
CCM2	475.699	1.88345	0.560069	3.36288	0.000771326	0.0202738	CCM2	9.28117	23.7383	38.4227
AAMP	1176.04	1.31122	0.390777	3.35541	0.000792478	0.0205397	AAMP	29.8985	63.7632	80.8568
NEK2	681.596	1.35969	0.405275	3.35498	0.0007937	0.0205397	NEK2	14.8106	39.1003	42.8697
TSPAN1	80.3501	1.92445	0.573931	3.3531	0.000799132	0.0205812	TSPAN1	1.74137	3.44562	8.80493
PACSIN3	253.253	1.7666	0.526898	3.35283	0.00079991	0.0205812	PACSIN3	4.9631	10.0461	18.6684
VPS4A	483.199	1.65067	0.493032	3.348	0.000813968	0.0207599	VPS4A	8.65535	12.9226	30.6598
ACTR8	281.746	1.43902	0.430064	3.34607	0.000819664	0.0207641	ACTR8	3.16775	9.31941	11.3613
PEMT	680.67	1.46517	0.437934	3.34564	0.000820943	0.0207641	PEMT	40.4362	74.406	92.8569
NDUFS2	1482.53	1.17369	0.351602	3.33812	0.00084346	0.0211661	NDUFS2	37.5495	68.8487	85.9841
CLTB	2068.07	1.79419	0.537637	3.33718	0.000846329	0.0211661	CLTB	78.0558	133.69	214.763
MPC1L	19.5801	2.38329	0.714364	3.33624	0.00084919	0.0211981	MPC1L	0.753692	0.960081	10.7119
SH3GLB2	906.609	1.66987	0.500794	3.33445	0.000854687	0.0212562	SH3GLB2	15.1054	14.3023	42.1859
CENPH	521.378	1.21409	0.364905	3.32713	0.000877442	0.0217013	CENPH	18.9311	33.7699	47.3448
VRK3	372.091	1.46186	0.439681	3.32482	0.000884747	0.0218417	VRK3	7.93874	22.3764	22.9565
PEPD	565.783	1.39543	0.420333	3.31981	0.000900775	0.0220396	PEPD	13.7386	25.1772	30.9815
ARFRP1	312.485	1.32067	0.39838	3.3151	0.000916113	0.0222876	ARFRP1	5.50797	13.1897	11.9155
PSMC4	1949.3	1.17142	0.353999	3.3091	0.000935967	0.0225768	PSMC4	52.1898	103.826	121.703
MYBL2	6661.84	1.65466	0.500108	3.3086	0.000937624	0.0225768	MYBL2	96.4919	130.577	306.059
TRAP1	1290.24	1.15392	0.34896	3.30674	0.000943873	0.0226174	TRAP1	30.3138	44.3221	69.7513
MTFMT	275.744	1.25278	0.379402	3.30199	0.000960022	0.0227385	MTFMT	4.32893	9.85175	12.0486
ATP6V1B1	1218.81	2.02194	0.61242	3.30156	0.000961492	0.0227385	ATP6V1B1	20.308	37.3635	101.719
GNPDA1	2573.31	1.51275	0.458226	3.30132	0.000962326	0.0227385	GNPDA1	48.9478	77.9403	158.905
SDHA	867.231	1.17622	0.356615	3.29829	0.000972744	0.0227568	SDHA	14.6466	19.5546	37.1704
FAHD2B	47.3951	1.8252	0.555335	3.28667	0.00101381	0.0235939	FAHD2B	2.31525	2.56981	8.03353
SLC8B1	151.261	1.85215	0.56479	3.27936	0.00104042	0.0240166	SLC8B1	1.5929	1.92156	7.81647
NELFCD	600.451	1.17635	0.359113	3.27571	0.00105396	0.024177	NELFCD	11.8187	20.218	29.4978
MX1	643.77	1.95594	0.59716	3.27541	0.0010551	0.024177	MX1	8.10109	21.3796	42.7796
C21orf33	758.32	1.32078	0.404115	3.26832	0.00108188	0.0244854	C21orf33	24.1792	32.5042	53.0653
ALPL	515.106	1.71604	0.525875	3.26322	0.00110154	0.0246925	ALPL	8.00716	16.7327	20.4152
IER2	640.015	1.2221	0.374726	3.26131	0.00110899	0.024818	IER2	14.7009	19.1202	39.3241
C5orf34	297.443	1.38879	0.425941	3.26052	0.00111207	0.0248454	C5orf34	4.53951	16.9641	14.7818
RASD1	90.9494	2.24574	0.689791	3.25567	0.00113123	0.0251896	RASD1	1.55279	7.7746	11.8646
PPP1R14A	1206.33	1.47799	0.456503	3.23764	0.00120524	0.0261006	PPP1R14A	91.9358	246.698	200.667
HJURP	659.8	1.24943	0.386813	3.23006	0.00123764	0.0265875	HJURP	9.57627	18.9098	23.5819
FGFBP2	104.524	1.96169	0.608283	3.22497	0.00125986	0.0268924	FGFBP2	3.16391	1.21168	12.9054
RGS10	414.163	1.49558	0.463985	3.22333	0.0012671	0.0270039	RGS10	22.241	53.4922	52.4945
HMCES	568.549	1.28836	0.399914	3.2216	0.00127479	0.0271166	HMCES	16.7675	36.8433	48.7702
AKAP8L	471.537	1.29767	0.402848	3.22123	0.00127643	0.0271166	AKAP8L	9.72814	16.3591	28.0377
COQ9	364.71	1.31099	0.407362	3.21825	0.00128978	0.0273135	COQ9	10.2132	18.1937	28.2477
SHPK	180.451	1.37242	0.426663	3.21664	0.00129699	0.0273368	SHPK	1.94558	3.68893	5.31532
GAS6	408.15	1.57791	0.490618	3.21616	0.0012992	0.0273403	GAS6	5.8013	7.2584	18.2761
TSR2	660.381	1.53552	0.478221	3.2109	0.00132322	0.0275578	TSR2	22.6799	30.7534	77.1282
SNAR-E	9.90909	-2.52263	0.787852	-3.20191	0.00136519	0.0281977	SNAR-E	1828.8	688.249	10919.5
MAD1L1	105.65	1.42912	0.446632	3.19977	0.00137536	0.0283206	MAD1L1	2.671	2.58277	5.41294
MACROD1	73.4211	1.76118	0.550571	3.19883	0.00137986	0.0283697	MACROD1	2.29732	3.67095	5.02442
ATP23	136.141	1.76695	0.552606	3.19748	0.00138632	0.028438	ATP23	4.49714	12.7119	18.575
EFHD1	758.602	1.6291	0.509688	3.19626	0.00139221	0.0284489	EFHD1	20.5267	29.6608	60.4054
DLG3	571.389	1.5932	0.49887	3.19361	0.00140507	0.0285659	DLG3	4.82175	7.31395	14.6783
ASRGL1	1800.5	1.34265	0.421417	3.18603	0.00144239	0.0290755	ASRGL1	32.0802	58.5001	77.4158
DHODH	139.478	1.2789	0.401809	3.18285	0.00145834	0.0293088	DHODH	2.34273	5.09948	6.13632
CYB5B	2957.23	1.33239	0.419072	3.17938	0.00147589	0.0296172	CYB5B	30.5868	47.1872	94.3219
HOMER2	133.475	1.7825	0.560991	3.17741	0.00148598	0.0297752	HOMER2	2.69093	9.09865	9.35519
AATF	783.046	1.39024	0.437695	3.17627	0.00149184	0.0298035	AATF	16.559	23.4466	55.615
KIFC1	161.851	1.54261	0.485889	3.17481	0.00149934	0.0298553	KIFC1	1.93229	5.56214	10.0895
PDHA1	6214.98	1.33727	0.421778	3.17056	0.00152147	0.0300285	PDHA1	87.3881	111.972	241.171
AKR1A1	1695.1	1.30089	0.410347	3.17021	0.00152326	0.0300285	AKR1A1	57.3016	103.948	161.689
APEX2	373.173	1.47904	0.467649	3.16271	0.00156306	0.0305881	APEX2	8.0859	6.18214	25.5199
PXK	218.231	1.33431	0.42331	3.15208	0.00162109	0.0311776	PXK	3.20905	1.68394	8.32825
PPIL2	166.02	1.48162	0.470193	3.15109	0.00162664	0.0311948	PPIL2	2.95719	4.81077	6.78826
SMARCD2	562.126	1.33559	0.423985	3.15008	0.00163225	0.0312576	SMARCD2	8.76492	9.68194	26.4669
BCAP31	1183.83	1.46547	0.465479	3.14831	0.0016422	0.0313494	BCAP31	42.1015	60.1249	140.884
CDK5	466.691	1.36101	0.432557	3.14643	0.00165274	0.031416	CDK5	20.8365	38.0213	58.926
NTAN1	375.199	1.51445	0.481613	3.14454	0.00166351	0.0314963	NTAN1	20.4887	32.8562	53.9858
CDK10	111.245	1.395	0.443711	3.14394	0.00166687	0.0315154	CDK10	2.69331	5.45803	7.32747
SLC25A38	500.465	1.21035	0.385101	3.14295	0.00167254	0.031578	SLC25A38	9.97045	26.9013	20.9796
RBP7	240.921	2.00865	0.639277	3.14207	0.00167758	0.0316286	RBP7	17.6355	26.0293	89.9787
COG4	248.873	1.35468	0.431457	3.13979	0.00169071	0.0317423	COG4	3.50276	5.48179	10.8905
GLTP	305.755	1.34163	0.427983	3.13478	0.00171984	0.032154	GLTP	5.30274	4.97404	11.6839
TMEM37	838.583	1.63689	0.522468	3.13299	0.00173034	0.0322266	TMEM37	20.2834	30.106	80.3782
ATG7	239.347	1.51953	0.485165	3.13199	0.00173626	0.0322752	ATG7	3.14246	5.55598	8.74609
ARHGEF39	205.948	1.42584	0.455401	3.13095	0.00174242	0.0323059	ARHGEF39	2.61093	5.15539	6.35722
PUF60	1610.97	1.4155	0.452191	3.13032	0.00174614	0.03233	PUF60	41.6504	90.3361	109.473
DDX39A	2335.61	1.34633	0.430242	3.12924	0.00175257	0.0324044	DDX39A	76.6114	114.861	199.509
SLC25A22	124.681	1.43564	0.460079	3.12041	0.00180599	0.0332089	SLC25A22	1.95986	1.38504	5.18145
AK1	111.69	1.8213	0.58592	3.10844	0.00188077	0.0340009	AK1	1.71231	2.8296	7.51167
GCDH	224.074	1.18862	0.382544	3.10715	0.00188899	0.0340416	GCDH	5.96855	9.3537	13.3518
NDUFA10	2688.17	1.08898	0.350481	3.10709	0.00188937	0.0340416	NDUFA10	32.0639	61.6344	102.885
CSTF2	1194.85	1.39908	0.451383	3.09953	0.00193826	0.0347822	CSTF2	26.2666	47.9901	88.8074
KIF22	1213.92	1.18481	0.382514	3.09743	0.00195205	0.0348897	KIF22	27.299	43.6259	68.7208
COG8	123.043	1.71646	0.556378	3.08506	0.00203511	0.0358484	COG8	2.64116	3.93113	10.889
ILKAP	391.024	1.14701	0.372347	3.08048	0.00206666	0.0360724	ILKAP	13.4652	24.6556	29.0256
PINK1	190.247	1.9428	0.630806	3.07987	0.0020709	0.0360993	PINK1	9.4218	11.755	31.0038
IDH3A	2155.92	1.3744	0.447532	3.07108	0.00213288	0.0367817	IDH3A	37.9593	86.67	113.492
C12orf56	204.579	1.33684	0.435347	3.07075	0.00213521	0.0367817	C12orf56	4.93045	0.655631	14.6743
GEMIN8	292.74	1.22304	0.398877	3.0662	0.00216796	0.0372107	GEMIN8	4.27436	4.75197	9.25873
THOC3	391.884	1.31538	0.429282	3.06415	0.00218291	0.0373715	THOC3	35.5837	62.2113	80.6672
METTL18	333.497	1.06879	0.349335	3.05949	0.00221716	0.037736	METTL18	12.2346	25.5528	25.9555
PDXK	1837.44	1.42279	0.465336	3.05756	0.00223144	0.0378638	PDXK	10.9632	19.2827	28.0583
PRCC	616.265	1.24862	0.409495	3.04917	0.00229477	0.0385964	PRCC	13.2286	21.94	33.3703
PPP5C	683.486	1.26547	0.415767	3.04371	0.00233681	0.0391073	PPP5C	14.2395	28.1156	37.3175
FNDC10	111.68	1.74848	0.574553	3.04319	0.00234084	0.0391259	FNDC10	2.10657	4.45601	6.65785
PEX16	332.202	1.28849	0.424141	3.03789	0.0023824	0.0395248	PEX16	8.42102	12.4567	17.3726
VCP	3635.61	1.10558	0.364144	3.03612	0.00239643	0.0396256	VCP	42.6428	55.8032	110.682
PAF1	245.168	1.23425	0.406537	3.03601	0.00239734	0.0396256	PAF1	4.33266	6.86641	13.9451
CCNA1	563.832	2.45871	0.810607	3.03317	0.00242001	0.0399018	CCNA1	2.8135	19.0693	94.8667
ANXA11	1023.66	1.30171	0.429389	3.03154	0.00243308	0.0400681	ANXA11	18.3548	24.6565	43.85
AGPAT2	571.006	1.32007	0.435627	3.03028	0.00244329	0.0401868	AGPAT2	19.0432	65.8114	44.3746
NUP93	966.959	1.35921	0.448688	3.02929	0.00245128	0.040218	NUP93	14.2257	24.7618	49.5003
UCP2	192.768	1.53154	0.505602	3.02915	0.00245243	0.040218	UCP2	5.03818	9.95743	15.6874
SNAPC2	87.715	1.50177	0.49624	3.02631	0.00247561	0.040421	SNAPC2	2.63251	4.47766	8.81055
EIF2B4	816.709	1.26804	0.41914	3.02534	0.00248353	0.0404241	EIF2B4	21.5735	49.4637	66.3096
STRADB	355.207	1.0388	0.343425	3.02481	0.00248787	0.0404241	STRADB	5.94008	13.2956	16.1453
KIF20A	1054.73	1.26782	0.419276	3.02382	0.00249601	0.0404311	KIF20A	13.9221	28.4951	43.7597
TRABD	341.893	1.30704	0.432302	3.02343	0.00249924	0.0404311	TRABD	6.56331	13.6088	14.5884
BIN3	265.394	1.50192	0.496804	3.02316	0.00250148	0.0404311	BIN3	6.5205	10.1722	14.5884
ECH1	1058.41	1.37839	0.456147	3.0218	0.00251277	0.0404311	ECH1	40.5783	65.7897	101.889
OVOL2	215.784	1.49719	0.495688	3.02042	0.00252424	0.0404311	OVOL2	8.521	22.6268	19.8946
BAIAP2L1	1606.91	1.09278	0.361799	3.02039	0.0025245	0.0404311	BAIAP2L1	20.413	31.3441	42.9005
MIIP	1389.58	1.56197	0.517425	3.01874	0.0025383	0.0405015	MIIP	33.7017	63.6894	83.5901
EIF4E2	1989.73	1.03531	0.343298	3.01579	0.00256314	0.0406393	EIF4E2	93.537	169.176	206.003
LOC407835	46.1294	1.82215	0.604599	3.01382	0.00257981	0.0407891	LOC407835	1.04652	2.92496	5.26762
ASNA1	1108.19	1.35487	0.449601	3.01349	0.00258264	0.0407891	ASNA1	43.0625	90.4006	124.001
YPEL3	302.698	1.55843	0.517593	3.01091	0.00260464	0.0409803	YPEL3	15.4705	32.2365	36.5513
CNOT10	970.144	1.26016	0.418995	3.00757	0.00263342	0.0413674	CNOT10	14.6876	30.3439	50.3499
RAE1	1318.63	1.30021	0.433767	2.99748	0.00272221	0.0422494	RAE1	36.5788	82.7723	107.827
UBE2MP1	138.557	1.2727	0.425323	2.99231	0.00276876	0.0427595	UBE2MP1	8.00414	31.2942	20.5016
DAXX	652.743	1.29007	0.432697	2.98146	0.00286881	0.0437822	DAXX	11.7349	19.377	30.7973
MTFR1L	351.891	1.25777	0.422482	2.97709	0.00290998	0.0442772	MTFR1L	9.86552	34.9353	31.0551
LEO1	722.465	1.17218	0.395328	2.96509	0.00302593	0.0456361	LEO1	16.8527	50.4713	49.439
CENPA	1168.23	1.27933	0.431625	2.96398	0.00303685	0.0456361	CENPA	41.4774	120.972	89.8504
LENG1	108.998	1.36532	0.460712	2.9635	0.00304167	0.0456361	LENG1	6.46091	15.7549	16.1688
CDC25C	236.328	1.25891	0.424811	2.96345	0.00304207	0.0456361	CDC25C	5.01559	8.30522	12.1738
PPM1G	1160.91	1.09963	0.371083	2.96331	0.00304354	0.0456361	PPM1G	24.2437	42.8531	55.1267
MCM7	1906.42	1.16906	0.394728	2.96169	0.00305955	0.0457737	MCM7	29.2984	34.176	83.0581
IFITM2	1084.91	1.35246	0.457131	2.95858	0.00309061	0.0458902	IFITM2	96.5856	55.0528	315.841
FOXN3-AS1	48.8482	1.89583	0.640927	2.95796	0.00309687	0.0458902	FOXN3-AS1	1.60785	2.92021	5.07841
POLR2E	3935.55	1.24978	0.422926	2.95509	0.00312581	0.0460456	POLR2E	67.4696	115.161	154.407
TANGO2	164.549	1.39035	0.47069	2.95386	0.00313828	0.0460994	TANGO2	2.08087	2.7797	6.76057
SLC52A2	305.317	1.36947	0.464084	2.95091	0.00316834	0.0464679	SLC52A2	7.06291	10.0225	26.0849
VAC14	227.246	1.22619	0.415731	2.94949	0.00318302	0.0465304	VAC14	3.1631	4.50086	8.50648
BSG	2909.1	1.14619	0.388762	2.94831	0.0031952	0.0466575	BSG	87.5549	154.862	219.856
STIP1	2496.02	1.31081	0.445091	2.94503	0.00322921	0.0469993	STIP1	50.6608	88.1365	141.615
STUB1	226.382	1.47934	0.502675	2.94293	0.00325121	0.0471677	STUB1	19.6649	47.4345	53.3642
PPP4C	2220.4	1.18378	0.402501	2.94105	0.00327098	0.0473258	PPP4C	85.8731	144.022	192.568
NDC80	1564.5	1.09965	0.374	2.94023	0.00327964	0.047327	NDC80	35.8532	78.9422	92.4856
MAGEB2	299.942	1.32699	0.451529	2.93889	0.0032939	0.0473764	MAGEB2	8.78091	25.06	23.7539
POC1A	188.03	1.49384	0.508522	2.93762	0.00330742	0.047469	POC1A	3.70518	9.90179	10.3693
ZNF766	333.807	1.44066	0.490482	2.93724	0.00331151	0.0474693	ZNF766	5.10505	19.2175	16.1362
NGRN	1374.95	1.20448	0.410361	2.93518	0.00333353	0.0475273	NGRN	44.6054	64.2946	104.908
EBNA1BP2	3248.5	1.05756	0.360377	2.93459	0.00333985	0.0475273	EBNA1BP2	130.077	220.491	303.96
TRIM8	189.79	1.63802	0.558768	2.93149	0.00337336	0.0478012	TRIM8	2.71637	1.63216	7.5287
KLC1	601.258	1.09167	0.372967	2.92698	0.0034227	0.0483333	KLC1	10.0825	15.4846	26.6839
NUDC	2025.63	0.992754	0.339696	2.92248	0.00347255	0.048743	NUDC	45.0207	96.1156	124.99
TOMM40	2658.71	1.33439	0.456757	2.92145	0.00348409	0.0488538	TOMM40	58.9407	128.615	173.782
PPP1R7	1108.85	1.07011	0.366447	2.92024	0.00349765	0.0488905	PPP1R7	43.6969	52.745	97.9604
C7orf50	802.808	1.25431	0.42961	2.91966	0.00350415	0.0489304	C7orf50	33.4939	52.6955	70.836
ZNF773	87.0119	1.68	0.575626	2.91857	0.00351643	0.0489816	ZNF773	1.47674	2.13473	5.24774
SMARCAL1	132.318	1.29346	0.443213	2.91836	0.00351878	0.0489816	SMARCAL1	1.72536	2.29933	5.62683
PSMD2	3228.05	1.06011	0.36356	2.91591	0.00354656	0.0492976	PSMD2	50.8955	71.3655	136.213
DUS2	445.023	1.20769	0.414456	2.91391	0.00356927	0.0494789	DUS2	9.47475	14.7998	24.469
CDK5RAP2	347.86	1.18419	0.406449	2.9135	0.003574	0.049481	CDK5RAP2	2.42935	5.8271	5.15658
NUDT7	77.129	1.7153	0.588791	2.91326	0.00357681	0.049481	NUDT7	3.18618	11.1879	8.66648

## Sheet: h_BiPbla_2foldmore_GG_pad005
Supplementary Table 2. The expression of downregulated gene in GG compared with that of Bi-P blastocyst.
DEseq2 result								FPKM (replicates merged )
Gene	baseMean	log2FoldChange	lfcSE	stat	pvalue	padj	Gene	Bi-P bla	AG bla	GG bla
LIN28B	1493.72	-7.13911	0.456941	-15.6237	5.01962e-55	6.7288e-51	LIN28B	23.3826	20.868	0.108074
NORAD	1386.09	-6.09545	0.576129	-10.58	3.68919e-26	2.47268e-22	NORAD	21.6157	13.0269	0.199749
PWARSN	138.832	-6.22475	0.660656	-9.42208	4.42248e-21	1.48208e-17	PWARSN	6.73321	13.3419	0
RNF141	485.592	-4.83146	0.572785	-8.43503	3.31113e-17	8.87714e-14	RNF141	10.948	23.6475	0.0923465
CHAC2	177.07	-5.22779	0.629002	-8.31125	9.46975e-17	2.1157e-13	CHAC2	13.973	36.1738	0.112255
KIAA0101	2131.15	-3.78965	0.473814	-7.99818	1.26275e-15	1.88079e-12	KIAA0101	134.346	96.7216	7.24654
PKIB	1268.1	-3.90945	0.520934	-7.50469	6.15731e-14	6.77923e-11	PKIB	61.7509	45.3396	1.75776
FABP7	1830.11	-3.99833	0.533388	-7.4961	6.57441e-14	6.77923e-11	FABP7	170.483	6.67429	8.80802
GAL	242.922	-3.61219	0.507312	-7.12025	1.07729e-12	9.6274e-10	GAL	34.2291	71.5077	2.08975
MTRNR2L8	5005.47	-3.25118	0.482501	-6.73819	1.60373e-11	1.13147e-08	MTRNR2L8	344.913	77.4593	38.0553
MTRNR2L2	4216.87	-3.22728	0.509028	-6.34008	2.29651e-10	1.3993e-07	MTRNR2L2	760.181	260.74	151.024
MTRNR2L9	1250.71	-2.79855	0.466495	-5.9991	1.9841e-09	1.06387e-06	MTRNR2L9	1123.14	240.461	89.8529
SEPP1	714.418	-2.70414	0.454253	-5.95294	2.63372e-09	1.35789e-06	SEPP1	69.904	69.6398	10.7571
MMD	262.672	-2.75412	0.466794	-5.90008	3.63333e-09	1.80388e-06	MMD	7.93319	1.72425	0.845105
RMRP	61.6509	-3.82912	0.649765	-5.89308	3.79055e-09	1.81472e-06	RMRP	101.33	8.1132	2.79715
RPPH1	86.4416	-3.6045	0.623011	-5.78562	7.22471e-09	3.22824e-06	RPPH1	64.1895	4.46277	1.62751
RPS29	8791.53	-2.10743	0.380582	-5.53739	3.07015e-08	1.17587e-05	RPS29	5354.88	4095.75	1156.04
GJC1	710.637	-2.48327	0.452229	-5.49117	3.9927e-08	1.40848e-05	GJC1	6.92785	2.13488	1.28654
HSPA1B	521.377	-3.12792	0.58825	-5.31734	1.05297e-07	3.06849e-05	HSPA1B	21.6842	2.14483	1.81315
RPL10L	50.7435	-3.60408	0.679171	-5.30659	1.11697e-07	3.18573e-05	RPL10L	8.05283	6.41227	0.280177
RPS12	7722.93	-1.93971	0.369125	-5.25488	1.48119e-07	4.05212e-05	RPS12	960.897	959.763	415.474
LINC00668	481.552	-2.42875	0.473751	-5.12664	2.94957e-07	7.18891e-05	LINC00668	18.6253	10.1827	3.30912
ARID3A	1487.73	-2.92911	0.581635	-5.03599	4.75386e-07	0.000111799	ARID3A	41.2009	11.3174	3.11113
BTBD7	505.997	-1.88284	0.377144	-4.99237	5.96413e-07	0.000131753	BTBD7	7.70368	3.81527	2.95383
OPN3	97.6036	-2.80826	0.562624	-4.99136	5.99547e-07	0.000131753	OPN3	11.1814	6.0006	0.692647
CYB5R2	74.9435	-3.13198	0.627927	-4.9878	6.10698e-07	0.000132039	CYB5R2	5.15915	11.8392	0.57187
NRN1L	75.1246	-3.17265	0.649122	-4.8876	1.02071e-06	0.000207312	NRN1L	13.7903	9.2423	0.625074
B4GALT6	427.689	-2.12237	0.438482	-4.84026	1.29668e-06	0.000255617	B4GALT6	7.01295	1.36537	1.35703
HAPLN1	1301.84	-3.05701	0.637881	-4.79245	1.6476e-06	0.000306751	HAPLN1	23.0519	5.64711	2.02817
CCNK	552.325	-1.67883	0.353866	-4.74427	2.09256e-06	0.000374011	CCNK	19.9455	14.029	6.76593
SND1-IT1	220.959	-2.36304	0.500829	-4.71827	2.37863e-06	0.000418663	SND1-IT1	6.78581	2.61307	1.16339
GOLGA8A	277.878	-2.02833	0.435718	-4.65515	3.23742e-06	0.000535772	GOLGA8A	5.46045	2.42227	1.25968
SETD7	425.098	-2.3643	0.511147	-4.62548	3.73734e-06	0.0005894	SETD7	6.37159	1.15405	1.52895
TNFAIP8	704.139	-1.91221	0.415635	-4.60069	4.21101e-06	0.00065638	TNFAIP8	29.2682	3.51471	8.36796
IRX2	575.559	-2.77073	0.605332	-4.57721	4.71213e-06	0.000701845	IRX2	14.5306	9.09603	0.920468
PMEL	153.764	-2.38534	0.522846	-4.56223	5.06144e-06	0.000737484	PMEL	7.35365	2.53923	0.938157
LGALS1	317.676	-2.62142	0.576892	-4.54404	5.5185e-06	0.000775464	LGALS1	72.7376	7.88091	10.7937
WRB	504.653	-1.76554	0.388654	-4.54271	5.55349e-06	0.000775464	WRB	34.7808	59.5482	10.1859
P4HA1	263.394	-2.47995	0.548833	-4.51859	6.22528e-06	0.00085153	P4HA1	7.45667	5.07955	1.28084
UCHL1	186.929	-2.3998	0.536603	-4.4722	7.7418e-06	0.00102271	UCHL1	15.4042	16.2638	2.23797
SCD	5086.79	-2.03832	0.460287	-4.42837	9.49487e-06	0.00122383	SCD	68.2826	41.0915	18.239
LRP2	5568.02	-1.76568	0.399107	-4.42409	9.68494e-06	0.00123644	LRP2	26.1151	12.0772	7.59968
EP300	834.314	-1.66817	0.378968	-4.40188	1.07317e-05	0.00131672	EP300	6.77493	3.35906	1.83709
ITGA6	732.881	-2.28778	0.525683	-4.35202	1.34891e-05	0.00155881	ITGA6	9.86797	4.2968	1.76303
TMEM123	1621.65	-1.62179	0.375722	-4.31647	1.58545e-05	0.00177108	TMEM123	35.0951	5.03718	10.3811
CALD1	1688.95	-1.99018	0.461808	-4.30953	1.63601e-05	0.00181246	CALD1	31.2528	18.7031	4.92257
ERVH48-1	336.033	-1.95003	0.455392	-4.28209	1.85143e-05	0.00189538	ERVH48-1	8.31592	7.29933	2.69163
GDF3	191.261	-2.38929	0.557985	-4.28199	1.85226e-05	0.00189538	GDF3	16.35	1.39931	2.12258
LCMT1-AS2	260.97	-2.68191	0.627885	-4.27134	1.943e-05	0.00195833	LCMT1-AS2	6.72489	2.68881	0.796464
TFRC	11019.2	-1.91065	0.448227	-4.26269	2.01979e-05	0.00199033	TFRC	183.012	121.04	50.4502
SLC1A5	755.384	-2.35283	0.552544	-4.25818	2.061e-05	0.002002	SLC1A5	34.348	17.4384	3.84761
FAM222B	550.64	-1.73201	0.407378	-4.25161	2.12241e-05	0.00204132	FAM222B	9.921	6.02184	2.5547
RTN4	1661.98	-2.44369	0.577334	-4.23271	2.30894e-05	0.00213457	RTN4	78.8999	30.5338	12.1646
LINC00379	68.1407	-3.18553	0.755097	-4.2187	2.45713e-05	0.00220594	LINC00379	6.74048	0.326559	0.0674311
DHX33	995.715	-1.70754	0.404974	-4.21643	2.48199e-05	0.00220594	DHX33	13.3418	6.96098	3.86216
DSG2	3654.36	-1.56453	0.371455	-4.21189	2.53246e-05	0.0022188	DSG2	46.8248	27.2067	14.1646
MBD3	947.625	-2.02794	0.483525	-4.19408	2.73987e-05	0.00233936	MBD3	30.9475	30.5487	5.39821
IPO7	2424.25	-1.72881	0.415364	-4.16215	3.15265e-05	0.00267158	IPO7	27.7839	16.989	7.21996
NEAT1	4761.93	-1.85559	0.445951	-4.16098	3.16882e-05	0.00267158	NEAT1	15.0508	4.36595	4.13669
YY1	1735.02	-1.56274	0.376433	-4.15144	3.30396e-05	0.00268905	YY1	41.711	24.1565	13.2108
SLC7A2	8576.66	-1.75436	0.422633	-4.15102	3.30991e-05	0.00268905	SLC7A2	84.5298	40.0081	19.1312
FIGN	804.025	-2.30089	0.554655	-4.14833	3.34903e-05	0.00270444	FIGN	8.32416	2.74152	1.32084
RYBP	2077.42	-2.00036	0.483021	-4.14136	3.45259e-05	0.00273858	RYBP	35.2152	14.9559	8.05062
PCF11	1084.8	-1.75923	0.426167	-4.12803	3.65878e-05	0.00283502	PCF11	14.8945	6.22252	3.72302
LAMP1	636.678	-2.12164	0.517625	-4.09879	4.15315e-05	0.0031277	LAMP1	18.5414	10.0154	3.54392
SLC38A1	2943.09	-2.22098	0.543255	-4.08829	4.3456e-05	0.00321838	SLC38A1	28.4847	2.95576	8.32704
KRT19	2482.03	-1.73721	0.425061	-4.08697	4.37039e-05	0.00321896	KRT19	150.053	137.228	41.7303
TSC22D2	725.622	-1.79466	0.439565	-4.08281	4.44948e-05	0.00324159	TSC22D2	11.3189	4.94388	2.66701
YWHAG	1155.42	-1.98707	0.487116	-4.07926	4.51802e-05	0.00327373	YWHAG	22.9066	11.8014	5.04423
ZFAS1	2144.86	-1.45705	0.357867	-4.0715	4.67114e-05	0.00334848	ZFAS1	307.554	350.957	117.021
ADGRL2	989.079	-1.8524	0.455319	-4.06835	4.73466e-05	0.00336523	ADGRL2	12.4357	11.1531	3.47524
TRIM71	865.095	-1.80352	0.445197	-4.05105	5.09874e-05	0.00352312	TRIM71	7.48142	3.73312	2.00264
NID1	2193.88	-1.98933	0.491397	-4.04831	5.15897e-05	0.00352813	NID1	28.4438	9.6539	4.18332
NUFIP2	3354.28	-1.61037	0.397897	-4.04719	5.1836e-05	0.00352813	NUFIP2	22.2903	10.2392	8.07772
TP63	296.569	-2.71771	0.673269	-4.03659	5.42346e-05	0.00363507	TP63	5.09773	0.753549	0.578261
RPS21	6619.73	-1.59758	0.396124	-4.03304	5.50606e-05	0.00367207	RPS21	2960.92	1964.08	835.593
B4GALT1	732.645	-1.76701	0.439009	-4.02499	5.69785e-05	0.0037441	B4GALT1	13.1268	6.86261	3.07907
FES	165.711	-1.87223	0.467798	-4.00223	6.27487e-05	0.00400546	FES	5.22666	7.82469	1.04611
SLC7A11	1920.78	-2.3041	0.576334	-3.99785	6.39202e-05	0.00401644	SLC7A11	14.0871	3.79814	1.69029
FZD5	1273.62	-1.74902	0.439785	-3.977	6.9791e-05	0.0042937	FZD5	14.1651	8.52117	3.72963
RPL37A	9566.61	-1.53972	0.387431	-3.97418	7.06212e-05	0.00432273	RPL37A	3719.33	2665.55	1200.82
PPP1R10	565.126	-1.75127	0.441799	-3.96396	7.37168e-05	0.00447138	PPP1R10	9.01276	5.85505	2.45758
COL21A1	406.961	-2.0044	0.506412	-3.95804	7.55686e-05	0.00454259	COL21A1	7.74146	2.15968	1.16159
AHCYL1	1702.57	-1.82646	0.465236	-3.92587	8.64151e-05	0.00492934	AHCYL1	34.6737	15.2584	9.30235
ASCC3	1134.54	-1.60138	0.408929	-3.91603	9.00181e-05	0.00509153	ASCC3	14.6859	7.6009	6.04711
LAMC1	3104.7	-1.405	0.360006	-3.9027	9.51243e-05	0.00526918	LAMC1	28.7138	19.6843	9.58796
RAB11FIP1	1968.85	-1.52039	0.392031	-3.87824	0.000105214	0.00561909	RAB11FIP1	24.293	13.4427	7.58348
GNG12	302.718	-2.29836	0.593326	-3.87368	0.000107202	0.00566148	GNG12	5.4358	1.75156	0.789452
MEX3C	890.214	-1.77798	0.462222	-3.84659	0.000119772	0.00619903	MEX3C	16.0525	7.71226	4.87062
TACC1	3155.01	-1.30287	0.341642	-3.81356	0.000136981	0.00680084	TACC1	34.3409	17.1063	12.9457
COX8C	82.3348	-2.02744	0.536648	-3.77797	0.000158115	0.00754281	COX8C	19.7901	9.12106	3.90326
GLS	1559.54	-2.0113	0.53614	-3.75144	0.000175822	0.0081272	GLS	25.7885	10.4028	5.33645
TOR1AIP2	1656.86	-1.2979	0.349256	-3.71618	0.000202258	0.00877435	TOR1AIP2	15.2741	7.59495	6.0197
ANO6	1166.76	-1.44055	0.387846	-3.71422	0.000203828	0.00881392	ANO6	14.0803	5.91433	4.54507
TET2	4761.92	-1.44729	0.39019	-3.70918	0.000207928	0.00890502	TET2	36.5347	17.6845	10.472
AFF4	1040.92	-1.75351	0.473599	-3.70252	0.000213469	0.00908428	AFF4	7.64718	4.35679	1.679
PGRMC2	669.288	-1.8928	0.512706	-3.69179	0.00022268	0.00927026	PGRMC2	13.3093	5.02925	3.5045
ATP5I	7065.62	-1.45506	0.394465	-3.6887	0.000225401	0.00934792	ATP5I	3852.9	3765.85	1196.09
RPL23	10363	-1.38176	0.376298	-3.67199	0.000240665	0.0098357	RPL23	1605.23	1412.78	748.131
MED31	472.384	-1.49826	0.408647	-3.66639	0.000246003	0.00996273	MED31	31.8859	17.2942	12.8552
KCTD12	495.485	-2.19661	0.602662	-3.64485	0.000267548	0.0104564	KCTD12	5.93254	1.25626	0.830728
ODAM	1764.4	-1.98308	0.544078	-3.64485	0.000267553	0.0104564	ODAM	121.47	79.7047	28.8478
TEAD1	2261.03	-1.35176	0.372111	-3.63269	0.000280484	0.0109299	TEAD1	17.3837	9.85366	6.51547
ELOVL5	1579.62	-1.33885	0.369068	-3.62764	0.000286024	0.0110688	ELOVL5	44.6948	17.9303	17.3665
ATP5E	184.886	-2.14928	0.595488	-3.60928	0.000307049	0.0115055	ATP5E	2436.22	2015.25	1123.32
SEC22C	181.172	-1.53097	0.424219	-3.60893	0.000307465	0.0115055	SEC22C	5.73171	5.60203	2.21931
TMEM131	497.277	-1.53069	0.42424	-3.60808	0.000308472	0.0115055	TMEM131	5.18769	2.49782	1.56419
GALNT7	309.337	-1.5735	0.436158	-3.60765	0.000308987	0.0115055	GALNT7	5.40518	1.04841	1.91424
GTF2A1	612.281	-1.42758	0.396317	-3.60211	0.000315649	0.0116564	GTF2A1	7.39938	4.99807	2.51422
NUP153	1313.49	-1.45806	0.404888	-3.60115	0.00031681	0.0116671	NUP153	16.2834	9.79937	4.73234
HOMER1	361.481	-1.54251	0.428839	-3.59695	0.000321973	0.0118248	HOMER1	5.61665	3.44937	2.12451
NR6A1	1209.14	-1.79899	0.502822	-3.57778	0.000346524	0.0125035	NR6A1	12.0128	6.02263	2.49857
REV3L	1162.55	-1.41458	0.395417	-3.57744	0.000346982	0.0125035	REV3L	6.71804	3.58398	3.19896
C1orf105	119.729	-2.3924	0.668956	-3.57631	0.000348472	0.0125235	C1orf105	13.5807	5.666	0.886029
RPL41	3117.22	-1.49913	0.419659	-3.57226	0.000353916	0.0126513	RPL41	4516.85	2821.97	1343.4
S100A6	3934.38	-1.70551	0.477884	-3.56888	0.000358513	0.0127318	S100A6	640.763	599.216	127.614
SNHG1	3251.33	-1.42368	0.400514	-3.55464	0.000378493	0.0133168	SNHG1	232.081	140.333	82.3881
RPL37	10911.3	-1.35685	0.382185	-3.55024	0.000384886	0.0134359	RPL37	418.754	405.677	206.29
IPMK	726.581	-1.44471	0.407802	-3.54268	0.000396088	0.0137553	IPMK	8.86393	6.14093	3.70735
BPTF	1438.48	-1.31271	0.37279	-3.52132	0.000429398	0.0144263	BPTF	8.65788	4.52917	3.39752
DSC2	1603.48	-1.55998	0.443853	-3.51463	0.000440375	0.0147213	DSC2	22.9775	11.299	7.23237
SUCO	1113.09	-1.87845	0.534633	-3.51353	0.000442196	0.0147454	SUCO	16.2812	6.00614	3.9332
CD24	6009.55	-1.14862	0.327331	-3.50903	0.00044974	0.0149486	CD24	230.663	129.605	98.2511
SLC7A5	1097.17	-1.77832	0.509482	-3.49045	0.000482211	0.0154642	SLC7A5	17.1715	15.8388	4.75934
CHML	1103.09	-1.60079	0.459883	-3.48085	0.000499821	0.0158932	CHML	11.7261	1.95865	4.13447
TCF7L2	1024.9	-1.65414	0.476625	-3.47052	0.000519443	0.016269	TCF7L2	19.4238	10.0414	5.95807
USF3	323.834	-1.46851	0.42672	-3.44139	0.000578724	0.0173942	USF3	7.85729	2.43245	1.87328
NCOA7	472.55	-1.25398	0.364776	-3.43766	0.000586771	0.0175451	NCOA7	5.77584	2.5306	2.21453
PRTG	869.493	-1.71279	0.499134	-3.43153	0.000600191	0.0175989	PRTG	5.04728	0.475375	1.34373
NDUFA3	1681.37	-1.28866	0.375625	-3.43071	0.000602007	0.0175989	NDUFA3	920.603	993.639	259.472
IRF2BP2	561.064	-1.38451	0.403584	-3.43054	0.000602379	0.0175989	IRF2BP2	9.02492	5.4236	3.06712
LINC00678	215.766	-2.28753	0.667016	-3.4295	0.000604691	0.0176215	LINC00678	17.8491	29.9307	3.83692
BLOC1S1	320.875	-1.34204	0.39247	-3.41949	0.000627398	0.0181647	BLOC1S1	163.797	146.282	79.9676
CASD1	514.267	-1.62691	0.476621	-3.41343	0.000641503	0.0184522	CASD1	9.59991	4.29438	3.25688
SREK1IP1	766.348	-1.27673	0.375102	-3.40368	0.000664843	0.0188566	SREK1IP1	7.6815	3.52547	2.75203
SNHG6	1365.41	-1.16531	0.342908	-3.39832	0.000678017	0.0190143	SNHG6	362.089	390.627	173.264
FRS2	729.645	-1.33307	0.392591	-3.39556	0.000684874	0.0191265	FRS2	7.84884	3.62618	3.3661
SLC39A14	901.941	-1.71243	0.505542	-3.38732	0.000705798	0.0195733	SLC39A14	13.9747	9.71842	4.34693
DAG1	1098.31	-1.52534	0.450955	-3.38246	0.000718394	0.0195733	DAG1	14.6389	9.40447	4.50857
EMC10	159.41	-1.8132	0.536313	-3.38087	0.000722564	0.0196072	EMC10	5.59678	2.93215	1.45927
USP53	1017.06	-1.14675	0.339328	-3.37946	0.000726278	0.0196234	USP53	9.86724	5.16862	4.72216
PITX2	119.685	-2.10738	0.626545	-3.3635	0.000769605	0.0202738	PITX2	5.09559	0.204116	0.859831
TMEM258	3843.07	-1.3287	0.396403	-3.3519	0.000802587	0.0206105	TMEM258	1559.21	1227.1	534.587
UBL3	868.571	-1.2416	0.37102	-3.34645	0.000818549	0.0207641	UBL3	15.1824	11.7323	6.52145
RPS15AP10	60.5872	-1.91848	0.573429	-3.34563	0.00082096	0.0207641	RPS15AP10	5.93593	1.31337	1.03252
ZBTB44	1175.38	-1.27528	0.381331	-3.34428	0.000824978	0.0208264	ZBTB44	9.17414	5.21841	3.62197
IFITM1	2137.63	-1.71906	0.515504	-3.33473	0.000853837	0.0212562	IFITM1	420.646	52.6297	138.088
ADIPOR2	636.981	-1.35555	0.40823	-3.32056	0.000898376	0.0220396	ADIPOR2	11.9089	9.2252	4.12862
SNX12	257.36	-1.68147	0.507465	-3.31347	0.000921466	0.0223197	SNX12	8.37081	4.90584	2.46304
FBXO33	397.132	-1.43264	0.433023	-3.30846	0.000938105	0.0225768	FBXO33	5.48666	3.18123	2.08083
ATP2A2	1158.01	-1.2714	0.384735	-3.30462	0.000951045	0.0226443	ATP2A2	9.91603	7.12738	3.52395
C5orf24	686.335	-1.54899	0.469324	-3.30048	0.000965204	0.0227385	C5orf24	14.4407	6.22338	4.0121
PRKDC	3494.48	-1.18431	0.359003	-3.29888	0.00097071	0.0227568	PRKDC	18.1691	10.4754	6.81519
HSP90AA1	66014.3	-1.17115	0.355046	-3.29858	0.000971752	0.0227568	HSP90AA1	1315.28	841.96	596.437
BAG2	234.556	-1.88808	0.574778	-3.28489	0.0010202	0.0237016	BAG2	9.35166	3.6431	1.71092
PRKAR2A	1101.74	-1.40178	0.427507	-3.27897	0.00104186	0.0240166	PRKAR2A	18.101	9.11131	6.42495
TMEM245	1461.8	-1.40731	0.430698	-3.26751	0.00108499	0.0244854	TMEM245	12.9794	5.84699	4.19249
C16orf72	1073.86	-1.65019	0.505207	-3.26637	0.00108936	0.024531	C16orf72	19.3226	10.5655	5.51178
E2F3	456.527	-1.39863	0.428235	-3.26603	0.00109068	0.024531	E2F3	6.95653	3.81717	2.43259
ARID4B	791.254	-1.22062	0.374529	-3.25908	0.00111774	0.0249306	ARID4B	9.50119	6.17023	3.94055
RPL31	9923.85	-1.2528	0.385535	-3.2495	0.00115609	0.0254891	RPL31	1986.65	1994.09	941.3
MAN2A1	1375.69	-1.57581	0.485185	-3.24786	0.00116275	0.0255066	MAN2A1	13.8767	5.01884	4.36123
FYB	667.214	-2.59321	0.798867	-3.2461	0.00116996	0.0255066	FYB	10.1845	0.165182	0.14036
KLHL11	637.728	-1.40019	0.431353	-3.24604	0.0011702	0.0255066	KLHL11	6.17808	3.17736	2.20546
RNF19A	326.347	-1.39023	0.428402	-3.24515	0.00117387	0.025545	RNF19A	5.40704	2.56176	2.25602
CA12	675.333	-1.41381	0.4359	-3.24342	0.00118104	0.0256535	CA12	12.1795	5.75529	4.29214
PALLD	1938.16	-1.24056	0.383643	-3.23365	0.00122221	0.0263828	PALLD	31.1113	18.4856	11.6029
SNU13	7706.45	-1.24068	0.383845	-3.23225	0.00122819	0.0264618	SNU13	427.526	559.865	188.262
GALNT11	628.152	-1.36944	0.425965	-3.2149	0.00130489	0.027374	GALNT11	16.5412	17.82	6.07842
COX7A2	16583.7	-1.11603	0.347341	-3.21308	0.00131321	0.0274626	COX7A2	2446.43	1994.79	1053.46
SNX14	417.791	-1.24842	0.389021	-3.20913	0.00133139	0.0276274	SNX14	7.59532	3.18802	3.43859
YAP1	2198.74	-1.6465	0.513509	-3.20638	0.00134417	0.0278494	YAP1	30.5185	10.2908	7.15565
HSD17B11	712.905	-1.49338	0.466217	-3.20318	0.00135917	0.0281167	HSD17B11	32.1012	17.2132	8.23764
ENAH	2261.18	-1.55179	0.485361	-3.19719	0.00138772	0.028438	ENAH	11.959	8.27278	3.57268
ERMP1	520.623	-1.25226	0.391722	-3.19681	0.00138955	0.028438	ERMP1	6.24812	3.48286	2.93699
ZFHX3	1146.11	-1.3496	0.422541	-3.19402	0.00140308	0.0285659	ZFHX3	6.15229	2.63445	2.13376
MBNL3	989.982	-1.28267	0.402428	-3.18732	0.00143597	0.0290335	MBNL3	6.48874	2.82368	2.11104
CCKBR	892.025	-2.03907	0.640142	-3.18534	0.00144583	0.0291012	CCKBR	32.5522	17.894	7.90087
TMEM181	1026.46	-1.25384	0.394836	-3.1756	0.00149529	0.0298278	TMEM181	13.6322	7.15532	5.18993
PAPD7	414.403	-1.46166	0.460506	-3.17404	0.00150335	0.0298553	PAPD7	8.73902	4.56091	2.61038
GTF3C4	987.506	-1.13094	0.357067	-3.1673	0.00153862	0.0302866	GTF3C4	7.76151	4.36861	3.53533
MINPP1	208.382	-1.46439	0.462513	-3.16617	0.00154462	0.0303602	MINPP1	7.19613	3.48863	2.17056
CANX	8588.2	-1.40311	0.44354	-3.16344	0.00155918	0.0305568	CANX	127.421	74.8773	50.6028
SON	4668.41	-1.09878	0.347558	-3.16143	0.00156996	0.0306337	SON	91.691	102.199	44.7744
UBR5	1412.88	-1.328	0.421118	-3.15351	0.00161319	0.0311598	UBR5	8.80739	4.42538	3.34885
SMARCA2	412.828	-1.73452	0.55023	-3.15236	0.00161958	0.0311776	SMARCA2	14.9884	2.08554	2.4159
RLF	497.076	-1.4391	0.457211	-3.14756	0.0016464	0.0313494	RLF	6.06175	4.09261	2.64866
MOB1B	1160.91	-1.12963	0.361044	-3.12879	0.00175526	0.0324094	MOB1B	12.2173	6.55322	5.2209
PAPD5	1053.39	-1.33965	0.428275	-3.12801	0.00175996	0.0324515	PAPD5	9.24853	5.53473	3.49406
DDX21	10381.3	-1.32612	0.425346	-3.11775	0.00182239	0.0334646	DDX21	160.353	122.33	69.9495
HSPA1A	421.91	-1.91031	0.612998	-3.11634	0.0018311	0.0334964	HSPA1A	19.4567	1.05323	2.31786
ZNF281	1407.16	-1.04342	0.334831	-3.11626	0.00183162	0.0334964	ZNF281	21.4081	11.6135	9.87379
USMG5	9750.56	-1.15308	0.370277	-3.1141	0.0018451	0.033697	USMG5	3207.88	3487.59	1293.14
TTC3	713.942	-1.19915	0.385483	-3.11077	0.00186601	0.0339133	TTC3	5.07796	2.2023	2.53484
MIGA1	615.819	-1.2058	0.387742	-3.1098	0.00187216	0.0339598	MIGA1	6.57727	4.30392	2.66968
EBLN3P	649.979	-1.41449	0.456172	-3.10079	0.00193007	0.0346818	EBLN3P	11.0511	6.84121	4.91856
MSL1	499.483	-1.28874	0.415979	-3.09809	0.0019477	0.0348897	MSL1	9.29519	4.80055	3.13838
JADE1	1091.56	-1.48795	0.481113	-3.09273	0.00198325	0.0352126	JADE1	14.1989	7.72465	5.05825
RAP2A	534.27	-1.45631	0.471817	-3.0866	0.00202459	0.03571	RAP2A	9.14175	3.73584	3.89809
HNRNPH1	2939.06	-1.27925	0.415702	-3.07732	0.00208874	0.0362219	HNRNPH1	95.7008	49.0084	44.5611
FCER1G	34.4334	-2.09799	0.682843	-3.07244	0.00212317	0.0366767	FCER1G	6.56083	0.3815	0.947202
SLC35F2	468.012	-1.23507	0.403314	-3.06231	0.00219637	0.0375061	SLC35F2	10.6331	10.9568	5.0535
TAOK1	1374.64	-1.09071	0.356695	-3.05782	0.00222957	0.0378638	TAOK1	8.2091	4.99305	3.40622
ATP13A3	2666.4	-1.17895	0.385693	-3.0567	0.00223789	0.0379252	ATP13A3	27.0262	17.7771	10.8648
SNHG5	3371.43	-1.96042	0.641886	-3.05415	0.00225695	0.0382001	SNHG5	529.39	181.503	175.547
MANEA	665.811	-1.27237	0.416796	-3.05274	0.00226763	0.0383287	MANEA	11.0794	9.42157	4.81708
TUG1	1066.31	-1.1621	0.380718	-3.05239	0.00227027	0.0383287	TUG1	9.97217	3.94178	4.79911
JMJD1C	746.602	-1.27864	0.419228	-3.04998	0.00228855	0.0385402	JMJD1C	6.18773	3.68969	1.95416
HELZ	1048.07	-1.04098	0.341676	-3.0467	0.00231369	0.038866	HELZ	5.11566	2.73472	2.54086
AIDA	248	-1.27109	0.417288	-3.04609	0.00231842	0.0388967	AIDA	15.2732	6.54229	6.4326
RBM26	693.424	-1.2098	0.397687	-3.04209	0.00234942	0.0391717	RBM26	9.07302	5.9138	3.78427
HORMAD1	319.718	-1.19004	0.39139	-3.04055	0.0023615	0.0393241	HORMAD1	12.3824	8.76277	4.66108
SNHG19	136.321	-1.39979	0.462306	-3.02785	0.00246301	0.0403134	SNHG19	78.1897	25.3941	21.9211
HS2ST1	539.231	-1.20628	0.398661	-3.02582	0.00247961	0.0404241	HS2ST1	5.7358	2.8256	2.35567
STOM	329.794	-1.34388	0.4446	-3.02266	0.00250561	0.0404311	STOM	8.6277	5.11792	3.24957
PCBP2	2738.64	-1.24051	0.41086	-3.0193	0.00253356	0.0404919	PCBP2	53.1035	52.1775	21.5013
CAMSAP2	1199.37	-1.55036	0.513498	-3.01921	0.00253433	0.0404919	CAMSAP2	11.7592	5.17931	3.25288
HINT1	8644.69	-1.31376	0.435318	-3.01794	0.002545	0.0405015	HINT1	1310.54	716.428	473.667
FOXJ3	476.188	-1.19542	0.396106	-3.01793	0.0025451	0.0405015	FOXJ3	6.47429	3.68893	2.59331
ZNF208	1248.25	-1.10857	0.367399	-3.01734	0.00255004	0.0405015	ZNF208	10.0977	3.79747	4.6374
ICA1L	243.057	-1.4041	0.465613	-3.01559	0.00256478	0.0406393	ICA1L	14.0834	16.8058	0.98463
CALR	945.802	-1.40152	0.46537	-3.01163	0.00259853	0.0409322	CALR	38.4098	35.4377	15.8352
PTBP3	2385.35	-1.07583	0.357981	-3.00526	0.00265353	0.0415545	PTBP3	22.8455	13.6609	10.6969
NPTN	1557.6	-1.2511	0.416678	-3.00256	0.00267722	0.0418138	NPTN	57.0995	37.7197	23.9682
KBTBD2	317.062	-1.6409	0.547015	-2.99974	0.00270211	0.042102	KBTBD2	6.18647	3.0539	1.45841
MED13	2452.58	-1.32595	0.44237	-2.99738	0.00272312	0.0422494	MED13	16.3136	6.80818	5.79568
LGR4	1713.64	-1.18898	0.397096	-2.99419	0.00275171	0.0425641	LGR4	23.9087	12.1369	9.74556
NUS1	1862.71	-1.23284	0.411763	-2.99406	0.00275294	0.0425641	NUS1	50.4842	31.8972	21.9868
PUM1	1883.4	-1.1657	0.39001	-2.98891	0.00279977	0.0430401	PUM1	24.7998	14.8617	11.2667
LINC00152	214.099	-1.56801	0.524873	-2.98741	0.00281353	0.0431526	LINC00152	91.1596	24.8214	17.0747
LRRC58	1565.29	-1.59169	0.535409	-2.97285	0.0029505	0.0446909	LRRC58	13.7684	3.42256	3.94233
HIST1H4C	10853.8	-1.4707	0.496212	-2.96384	0.00303821	0.0456361	HIST1H4C	4819.63	4498.56	1752.07
HEXIM1	441.668	-1.80372	0.609432	-2.95966	0.00307975	0.0458711	HEXIM1	6.47651	2.4046	1.8139
SLC38A2	3131.46	-1.38474	0.468033	-2.95864	0.00309004	0.0458902	SLC38A2	45.9019	21.891	13.904
DYRK1A	707.586	-1.23764	0.418749	-2.95555	0.00312111	0.0460269	DYRK1A	9.79152	4.52105	3.21612
EEF1E1	2415.33	-1.17654	0.398784	-2.95031	0.00317451	0.0464933	EEF1E1	397.647	345.836	185.554
NDUFB1	2501.26	-1.19126	0.403808	-2.95007	0.00317701	0.0464933	NDUFB1	857.181	688.304	307.003
SPTBN1	1767.04	-1.13492	0.385793	-2.94179	0.00326323	0.0472904	SPTBN1	12.7817	8.02913	5.08077
TMED5	1838.47	-1.22494	0.416522	-2.94089	0.00327273	0.0473258	TMED5	21.7217	11.2184	8.65467
FST	219.065	-2.34126	0.796459	-2.93959	0.0032865	0.047327	FST	7.94795	0.910385	0.249356
DOCK9	999.665	-1.30631	0.444392	-2.93955	0.00328694	0.047327	DOCK9	9.12738	3.91084	3.33371
PTN	3492.22	-1.61798	0.550708	-2.93801	0.00330331	0.0474608	PTN	212.471	83.6638	56.4953
POLR2A	601.442	-1.28487	0.437642	-2.9359	0.0033258	0.0475273	POLR2A	6.43228	3.42737	1.90273
XIAP	1081.9	-1.68039	0.572989	-2.93267	0.00336058	0.047762	XIAP	8.60551	2.89247	2.20878
ANKRD17	1453.4	-1.04976	0.357985	-2.93241	0.00336347	0.047762	ANKRD17	9.65541	6.23651	4.70006
ARID1A	1147.51	-1.21883	0.415718	-2.93187	0.00336932	0.0477945	ARID1A	10.1547	6.50967	3.40301
CD59	884.706	-1.17056	0.399895	-2.92718	0.00342053	0.0483333	CD59	9.11095	5.71663	3.42179
SLIRP	19530.7	-1.06704	0.364584	-2.92674	0.00342534	0.0483333	SLIRP	7676.36	7922.39	3470.08
