# Supplementary material for: Parental methylome reprogramming in human uniparental blastocysts reveals germline memory transition
Source: HighWire-hosted journal article supplement (doi:10.1101/gr.273318.120), 2021-07-30
Supplement: Supplemental_Table_S3.xlsx [file Supplemental_Table_S3.xlsx]

## Sheet: hAG_2foldless_hGG
Supplementary Table 3. Gene expression and promoter DNA methylation for differentially expressed genes between AG and GG
Downregulated in AG embryos
	FPKM					TSS DNA methylation
Gene	AG bla rep1	AG bla rep2	GG bla rep1	GG bla rep2	P-value	AG bla	GG bla	Bi-P bla
IFITM3	309.709	82.7498	637.143	1018.3	0.00856907	0.158194	0	0.0857826
SCGB3A2	73.7877	120.399	300.621	362.803	0.00408528	0.221932	0.805555	0.356643
IFITM2	67.0055	39.6613	146.116	387.695	0.00160117	0.18061	0.0128968	0.109384
HPGD	20.1352	71.0624	167.549	186.252	0.00933216	0.0128079	0.00581395	0.00462963
PHOSPHO1	9.67505	25.798	142.309	125.425	2.63904e-05	0.0502327	0.0799557	0.0577625
DECR2	30.0147	21.4068	130.69	96.7712	0.000617179	0.0743585	0.397421	0.0684175
OXT	21.46	31.3782	86.2805	139.687	0.00567454	0.0834677	0.0793959	0.156943
POMC	15.6635	11.5421	54.2871	69.966	0.000897733	0.0925926	0	0.190633
B2M	4.85659	5.34624	55.3059	61.8597	9.85658e-08	0.0718704	0.0322581	0.039219
TPM2	4.95523	13.3293	33.2626	51.2193	0.00319143	0.0161221	0	0.029773
TKTL1	1.87349	0.513042	7.63448	91.6578	1.10098e-07	0.128545	0.0555556	0.104762
LCP1	1.96792	0.745367	54.002	32.8852	6.31607e-13	0.219048	0.142857	0.425185
LAS1L	7.66717	10.6105	24.0164	46.3785	0.00572946	0.034968	0.179293	0.0976852
VCX	4.63594	7.15505	42.9507	29.1226	5.53919e-07	0.0815232	0.276374	0.402778
ID3	2.69586	4.64349	34.4745	29.7736	8.87999e-06	0.0961158	0.0295139	0.0409349
MSMB	6.56267	4.76551	32.9515	27.0591	0.00615346	0.125645	0.0632184	0.107226
SOCS1	2.80979	7.85773	32.3265	28.136	0.00107539	0.00975337	0.0266393	0.0402031
APEX2	6.04256	6.21994	20.6876	27.2703	0.00325298	0.192308	0.5	0.333333
COMT	7.00553	5.41586	26.5488	20.497	0.00681104	0.132727	0.0173611	0.126616
H1F0	1.40427	6.74125	23.0618	28.1261	0.00115782	0.0302752	0.0628571	0.0281025
HAND1	0.82099	0.119717	28.9065	24.0183	4.3102e-12	0.00913622	0.0816492	0.0451223
PLA2G16	4.64084	5.55117	26.4641	13.8134	0.00782013	0.0474127	0	0.047785
NFKB2	2.7032	5.24644	18.8743	14.1892	0.00322322	0.0440538	0.0808872	0.0264982
TXNIP	1.33386	0.17619	13.0533	23.8569	4.7371e-08	0.0767399	0.233916	0.121298
FGFBP2	0.599285	1.91425	21.471	11.4756	2.53632e-05	0.169282	0.0190476	0.169075
OTUD5	3.40485	3.34445	15.4364	10.5303	0.00634351	0.00632604	0.0156627	0.0204082
LYPD3	2.5158	0.285374	9.61316	17.5451	0.000807533	0.028793	0.0246063	0.0404212
DUSP9	0.385071	2.13221	7.61578	19.6226	0.000177793	0.0442672	0.0196078	0.0651856
DLX5	1.42186	3.42388	13.0162	11.697	0.00396064	0.0487098	0.0955882	0.0355601
C12orf56	0.796223	0.487517	12.2933	15.7227	5.62145e-09	0.0256786	0.0694444	0.0483347
C9orf135	1.33282	1.32908	17.1338	9.3824	0.00080057	0.382456	0	0.125
MAL2	3.54064	1.48933	13.8608	10.2711	0.00269282	0.0258938	0	0.038282
MS4A15	2.60956	1.57429	16.6873	8.00904	0.00169395	0.0894451	0.0798224	0.0915467
GRAMD3	4.13644	1.5281	11.666	10.6741	0.00990046	0.357063	1	0.503687
EPSTI1	3.56451	1.32306	8.42046	13.7517	0.00365693	0.0463755	0.0658915	0.131429
TRIM8	0.906601	2.46919	12.9354	6.40522	0.00170811	0.00978594	0.0043497	0.0159828
SYCE1	0.645457	2.49431	13.2437	5.9444	0.00476544	0.0642759	0.182011	0.11992
NDRG2	0.328778	0.348398	13.2576	7.93545	3.56668e-09	0.0183983	0.0106383	0.0315427
PXK	1.3857	2.13301	9.63807	8.16585	0.000975636	0.229902	0.727273	0.321645
PPP1R14D	1.15244	1.02065	11.7984	6.7216	0.00845424	0.0924722	0.007326	0.0908676
NUP62CL	1.38715	0.746381	8.3775	9.35907	9.02257e-05	0.231481	0.333333	0
TMEM8A	1.16615	0.42244	8.48536	8.82113	1.05879e-05	0.0323532	0.0583333	0.0602998
SLC2A11	1.1071	0.896709	10.6049	5.80944	0.000123396	0.0353577	0.119048	0.0871246
NPTX1	0.199605	0.753199	11.4177	5.82735	1.7028e-07	0.00907867	0.010007	0.0154748
ZNF76	2.45122	1.0862	7.12754	7.29064	0.00878988	0.1337	0.409524	0.338033
C1orf115	2.32483	0.63752	6.73435	7.70067	0.00647193	0.0180952	0.100358	0.0581371
LOC644919	0.476013	0.560645	8.10365	8.18605	0.0014364	NA	NA	NA
RARRES1	1.17565	0.477494	5.60272	9.79092	0.000225647	0.0598168	0.134091	0.126461
ABHD4	1.43102	1.48056	7.53439	5.83852	0.00412323	0.0993636	0	0.0322917
FAM3A	1.57485	1.00837	8.18252	5.19248	0.00538286	0.0740523	0.0643939	0.137193
IFI16	0.103432	1.32375	6.62468	7.70588	0.00283495	0.326282	0.0428571	0.204
LOC101927056	0	1.01438	6.7748	5.3433	0.00413042	NA	NA	NA
TAZ	1.02285	1.12125	5.37461	5.29394	0.00574259	0.0959427	0.0708812	0.0666667

## Sheet: hAG_2foldmore_hGG
Supplementary Table 3. Gene expression and promoter DNA methylation for differential expressed genes between AG and GG
Upregulated in AG embryos
	FPKM					TSS DNA methylation
Gene	AG bla rep1	AG bla rep2	GG bla rep1	GG bla rep2	P-value	AG bla	GG bla	Bi-P bla
SNU13	651.526	448.083	159.622	201.748	0.00215328	0.0617823	0.151745	0.0604882
RPS4Y1	535.911	757.4	0	0.137383	7.66351e-57	0.031746	NA	0.0589147
NMU	115.149	179.071	32.1011	40.1024	0.00040773	0.0449712	0.255952	0.0271164
TFRC	116.119	126.476	31.5745	55.3647	0.00840958	0.195999	0.582051	0.406803
EIF1AY	147.654	148.004	0	0	5.2124e-46	0	NA	0
KIAA0101	155.19	27.6429	6.89959	7.57255	2.20953e-06	0.0665899	0.840476	0.257437
GAL	64.8797	77.9254	1.05929	2.50808	1.88234e-14	0.0412454	0.446893	0.241465
BATF3	45.1391	81.8275	8.01027	8.98557	1.80576e-06	0.0517448	0.096907	0.0216199
WRB	54.0356	65.4787	9.11977	10.8256	5.73553e-06	0.0671617	0.806209	0.365638
PKIB	69.5091	16.9238	5.34624	1.01215	1.46606e-06	0.215686	0	0.3125
DDX3Y	28.241	51.0111	0	0.0141004	1.94819e-41	0.0263158	NA	0.026455
CHAC2	30.4662	42.4578	0.120673	0.11511	2.14285e-24	0.0494756	0.82415	0.180439
GGPS1	23.5643	30.2245	7.59418	8.4016	0.000880988	0.366762	0.756482	0.417785
LINC00678	27.6043	32.1683	0	5.00889	3.5458e-05	NA	NA	NA
LOC102546229	28.8367	30.7905	0.521075	1.24342	1.59806e-09	NA	NA	NA
CBR1	40.9597	18.0113	0	0.0275321	2.58301e-20	0.0503236	0.679875	0.167712
ZNF676	15.4088	30.0344	5.03889	7.21933	0.00174641	0.559524	1	0.592321
NUP50-AS1	21.3994	24.7491	8.20244	1.4743	0.00558759	NA	NA	NA
TMEM120A	23.0344	16.5948	6.41771	3.54056	0.00164474	0.0585704	0.606071	0.32848
RNF141	16.1637	32.2777	0.430318	0.0153016	3.32228e-12	0.281481	0.5	0.272917
LIN28B	19.1523	22.8197	0.0726381	0.117157	6.03627e-31	0.120802	1	0.430454
ICA1L	20.7875	11.7985	0.971144	1.14599	0.00567792	0.310556	1	0.327645
R3HCC1	13.915	12.1059	1.86264	2.43945	8.50257e-05	0.0520496	0.923743	0.23881
THAP3	13.6528	12.6043	0.792522	0.0849925	3.18296e-08	0.0408361	0.691984	0.382793
PWARSN	10.4726	16.5925	0	0	1.37366e-19	NA	NA	NA
LINC00668	11.6001	8.45393	2.79122	3.52875	0.00839214	NA	NA	NA
NORAD	14.7824	10.9626	0.0999094	0.224508	4.48585e-22	NA	NA	NA
ZNF98	8.02599	13.3131	1.0329	2.22962	4.44539e-06	0.0258086	0.180555	0.129372
CYB5R2	15.422	7.76738	0	0.736449	2.32205e-07	0.0221631	0.880145	0.320655
OAZ2	12.9226	6.3611	2.23716	0.85716	0.000806249	0.0567607	0.705648	0.223442
DNMT1	8.26627	7.50876	2.71267	0.777904	0.00132038	0.0658543	0.806722	0.305972
FES	8.06665	7.50347	1.75476	0.906245	0.000171507	0.09466	0.0656068	0.110444
LOC101928595	6.3966	7.02168	0.804265	0.440552	7.97021e-07	NA	NA	NA
