# Supplementary material for: Parental methylome reprogramming in human uniparental blastocysts reveals germline memory transition
Source: HighWire-hosted journal article supplement (doi:10.1101/gr.273318.120), 2021-07-30
Supplement: Supplemental_Table_S4.xlsx [file Supplemental_Table_S4.xlsx]

## Sheet: DMRs of different classes
Supplementary Table 4. DNA methylation levels at known imprinted DMRs (defined by Okae et al.)
						DNA methylation									DNA methylation (Leng et al.)											Gene expression (log2(FPKM+0.1))
Gene	Methylated allele	DMR class	Chromosome	Start	End	AG bla	Sperm rep1	Sperm rep2	GG bla	Oocyte rep1	Oocyte rep2	Blastocyst	Bi-P		AG 2C	AG 4C	AG 8C	GG 2C	GG 4C	GG 8C	Bi-P 2C	Bi-P 4C	Bi-P 8C		Gene	AG bla rep1	AG bla rep2	GG bla rep1	GG bla rep2
PPIEL	Maternal	Maternal gDMR	chr1	40024626	40025540	0.0540278	0	0	0.833333	0.887934	0.820513	0.321291	0.526389		0.107143	0.0276786	0.0439484	0.910119	0.909872	0.752261	0.510597	0.275485	0.621316		PPIEL	-1.62	-2.32	-1.95	-2.33
DIRAS3-Ex2	Maternal	Maternal gDMR	chr1	68512505	68513486	0.0091575	0.026437	0.0404914	0.904762	0.975893	0.972685	0.396433	0.570644		0.0127005	0	0.0157895	0.728571	0.664067	0.972724	0.254545	0.0714286	0.183989		DIRAS3-Ex2	-0.59	-1.41	-3.32	-2.43
DIRAS3	Maternal	Maternal gDMR	chr1	68515433	68517545	0.0711428	0.00543328	0.00832562	0.933333	0.934028	0.956522	0.339885	0.444966		0.0333753	0.032967	0.0108447	0.992	0.949598	0.922596	0.178571	0.0766668	0.251567		DIRAS3	-0.59	-1.41	-3.32	-2.43
INPP5F	Maternal	Maternal gDMR	chr10	121578046	121578727	0.0512219	0.0081044	0.00147929	1	0.923214	0.908333	0.336043	0.248551		0.0111725	0.0210526	0.0118585	0.75	0.936275	0.896061	0.345957	0.692683	0.336125		INPP5F	4.48	5.37	5.71	4.77
KvDMR1	Maternal	Maternal gDMR	chr11	2719948	2722259	0.00182149	0.0056575	0.00713244	0.894785	0.915672	0.90556	0.376417	0.626017		0.0503558	0.0190653	0.0228505	0.947442	0.903861	0.913275	0.408594	0.526962	0.286808		KvDMR1	NA	NA	NA	NA
RB1	Maternal	Maternal gDMR	chr13	48892341	48895763	0.00988014	0.00585078	0	0.884314	0.94727	0.881303	0.403185	0.442452		0.0302012	0.010806	0.0142743	0.973881	0.928439	0.972923	0.349782	0.16075	0.413081		RB1	-0.33	1.09	1.32	1.94
SNURF	Maternal	Maternal gDMR	chr15	25200004	25201976	0.0329066	0.0110732	0.00235294	0.867647	0.927269	0.89099	0.402254	0.48307		0.0502518	0.016972	0.0195297	0.963068	0.938201	0.946637	0.321192	0.562556	0.251104		SNURF	3.25	2.96	-3.32	-3.32
IGF1R	Maternal	Maternal gDMR	chr15	99408496	99409650	0.0989418	0.00334225	0.00176768	1	0.914932	0.890933	0.339766	0.392086		0.0470588	0	0.0372685	0.941919	0.963339	0.934353	0.293535	0.542651	0.399166		IGF1R	-1.07	-1.02	-0.48	-1.96
ZNF597	Maternal	Maternal gDMR	chr16	3481801	3482388	0	0	0.00394089	0.875	0.945455	0.949359	0.402794	0.446053		0	0.00324675	0.0075	1	1	0.947826	0.208791	0	0.340184		ZNF597	-2.57	-0.55	-0.19	0.83
ZNF331	Maternal	Maternal gDMR	chr19	54040510	54042212	0.0109799	0.00215873	0.00314286	0.875709	0.941477	0.919492	0.395324	0.462469		0.053605	0.0261574	0.0118791	0.966609	0.971526	0.956105	0.326	0.173092	0.22745		ZNF331	2.27	2.02	2.41	1.65
ZNF331	Maternal	Maternal gDMR	chr19	54057086	54058425	0.00927871	0.00397185	0.00491339	0.840909	0.969269	0.995819	0.452562	0.631136		0.0120465	0.00257879	0.0279089	0.97399	0.980343	0.951024	0.984762	0.120359	0.278464		ZNF331	2.27	2.02	2.41	1.65
PEG3	Maternal	Maternal gDMR	chr19	57348493	57353271	0.0101259	0.00701117	0.00810065	0.948475	0.967118	0.914334	0.403628	0.450719		0.0399599	0.0145349	0.023397	0.944633	0.940187	0.950451	0.0467791	0.396807	0.331705		PEG3	-0.65	-1.16	-0.85	-2.51
MCTS2	Maternal	Maternal gDMR	chr20	30134663	30135933	0.0307692	0.0711579	0.0832278	0.861628	0.835264	0.916728	0.3795	0.424123		0.0232864	0.0892857	0.0124242	0.796296	0.940952	0.948232	0.230769	0.273399	0.125949		MCTS2	NA	NA	NA	NA
BLCAP	Maternal	Maternal gDMR	chr20	36148604	36150528	0.00628979	0.00299289	0.00472908	0.954805	0.962035	0.95045	0.381006	0.392451		0.0487489	0.021978	0.0257127	1	0.870183	0.975	0.133009	0.230375	0.123544		BLCAP	2.86	2.36	3.47	3.9
L3MBTL	Maternal	Maternal gDMR	chr20	42142365	42144040	0.0141796	0.00482568	0.00758377	0.850659	0.87443	0.963277	0.430484	0.539947		0.147703	0.0162381	0.04004	0.780613	0.849805	0.905389	1	0.142501	0.234423		L3MBTL	NA	NA	NA	NA
NESP-AS	Maternal	Maternal gDMR	chr20	57425649	57428033	0.0270755	0.0034632	0.00579428	0.938462	0.942589	0.966102	0.398281	0.442756		0.082487	0.00277778	0.0279945	0.966998	0.952211	0.974362	0.951515	0.23137	0.251906		NESP-AS	NA	NA	NA	NA
GNAS-XL	Maternal	Maternal gDMR	chr20	57428905	57431463	0.00976496	0.0038869	0.00356288	0.961175	0.922341	0.952965	0.380851	0.37679		0.0381338	0.0136219	0.0161808	0.959363	0.885917	0.975506	0.0709373	0.086598	0.243108		GNAS-XL	7.49898	5.64231	7.69423	7.24787
NHP2L1	Maternal	Maternal gDMR	chr22	42077774	42078873	0.00333333	0.00749559	0.0047771	0.738	0.939441	0.868421	0.398124	0.479646		0.0267806	0.0829493	0.00531915	0.968254	0.962121	0.848926	0.279783	0.544736	0.442543		NHP2L1	NA	NA	NA	NA
NAP1L5	Maternal	Maternal gDMR	chr4	89618184	89619237	0.0538889	0.00157233	0.00318309	0.969792	0.863121	0.918367	0.431029	0.356028		0.0621212	0.0307692	0.00829601	0.972222	0.95384	0.960622	0	0.766964	0.190125		NAP1L5	-1.16	-0.01	-3.32	-3.32
FAM50B	Maternal	Maternal gDMR	chr6	3849082	3850359	0	0.00407408	0.00869488	0.977778	0.930892	0.95939	0.415026	0.433581		0.0150328	0.0114146	0.0752565	0.936293	0.984159	0.958504	0.120968	0.369628	0.292438		FAM50B	-0.72	-2.44	-3.32	-1.79
PLAGL1	Maternal	Maternal gDMR	chr6	144328078	144329888	0.00770783	0.00230073	0.00533959	0.92	0.920638	0.854912	0.406723	0.674249		0.0157897	0.00313284	0.0226096	0.906593	0.874126	0.955882	0.219921	0.119777	0.166702		PLAGL1	-3.32	-3	-3.32	-3.32
IGF2R	Maternal	Maternal gDMR	chr6	160426558	160427561	0.0948148	0.0136986	0.00192308	0.943838	0.939966	0.908163	0.522396	0.602179		0.0846154	0.0238095	0.0328319	1	0.966967	0.970232	0.124235	0.02	0.363367		IGF2R	0.1	-1.17	-0.76	-1.57
WDR27	Maternal	Maternal gDMR	chr6	170054504	170055618	0	0.030332	0.03075	0.921569	0.929683	0.859169	0.418758	0.202511		0.0538675	0	0.182851	0.871429	0.853702	0.920574	0.457143	0.269281	0.406428		WDR27	-0.52	-1.24	-1	-0.6
GRB10	Maternal	Maternal gDMR	chr7	50848726	50851312	0.0401786	0.01201	0.0199607	1	0.903651	0.832831	0.376372	0.580079		0.00547089	0.064389	0.0160198	0.848951	0.875489	0.848286	0.5239	0.47931	0.136222		GRB10	3.5	2.52	3.44	3.62
PEG10	Maternal	Maternal gDMR	chr7	94285537	94287960	0.0167548	0.00882232	0.00230529	1	0.820147	0.93064	0.332657	0.286956		0.00238496	0.026938	0.0216374	0.805724	0.721638	0.695039	0.285714	0.254918	0.398003		PEG10	1.48	-3.32	-2.64	-3.32
MEST	Maternal	Maternal gDMR	chr7	130130122	130134388	0.0190139	0.00584697	0.00712152	0.924359	0.882315	0.908515	0.403845	0.382552		0.0156415	0.0213254	0.0630149	0.93231	0.923297	0.96203	0.0882456	0.49402	0.264259		MEST	6.31	6.64	4.94	6.34
HTR5A	Maternal	Maternal gDMR	chr7	154862719	154863382	0.0232849	0.00424243	0.00513708	0.932458	0.989177	0.936601	0.379346	0.414965		0.13955	0.0132653	0.0456331	0.934253	0.989136	0.863043	0.225497	0.0147059	0.23987		HTR5A	-3.16	-3.32	-2.2	-3.32
CXORF56	Maternal	Maternal gDMR	chr8	37604992	37606088	0	0.0148494	0.00338968	0.805556	0.985093	0.975676	0.328553	0.28083		0	0	0.0966045	0.25	0.973958	0.395868	NA	0.736111	0.715889		CXORF56	NA	NA	NA	NA
TRAPPC9	Maternal	Maternal gDMR	chr8	141108147	141111081	0.00413131	0.00590545	0.00416417	0.948333	0.906621	0.929413	0.420386	0.443374		0.0211534	0.0109608	0.0226538	0.948198	0.96197	0.911432	0.403596	0.399172	0.281345		TRAPPC9	-2.69	-1.83	-1.68	-1.37
H19	Paternal	Paternal gDMR	chr11	2018812	2024740	0.565976	0.768386	0.798819	0.0139839	0.0595511	0.0758672	0.361512	0.363772		0.560901	0.690966	0.544368	0.0125412	0.0186954	0.0182684	0.0787626	0.230375	0.251294		H19	-2.31	-2.65	1.45	0.07
IG-DMR	Paternal	Paternal gDMR	chr14	101275427	101278058	0.707388	0.963182	0.95509	0	0.111947	0	0.380892	0.403634		0.827237	0.914123	0.803187	0.00740079	0.0185011	0.0119507	0.7	0.429884	0.330144		IG-DMR	NA	NA	NA	NA
FAM196A/DOCK1	Maternal	Placenta-specific maternal gDMR	chr10	128993405	128995242	0.00489345	0.00264569	0.00486612	0.818931	0.904307	0.910923	0.395739	0.373023		0.0310285	0.0133007	0.0115018	0.966803	0.946936	0.959725	0.386287	0.0620202	0.324514		FAM196A/DOCK1	-0.719747	-2.43784	-3.32193	-1.79171
N4BP2L1	Maternal	Placenta-specific maternal gDMR	chr13	33000694	33002448	0.00287356	0.00326797	0.00645458	0.902063	0.776572	0.811198	0.360909	0.404733		0.0137703	0.00537778	0.0241316	0.730952	0.8086	0.852463	0	0.158621	0.209822		N4BP2L1	-3.32	-1.19	-3.32	-2.62
RGMA	Maternal	Placenta-specific maternal gDMR	chr15	93614998	93616859	0.0331439	0.00508617	0.00236305	0.798428	0.888365	0.939003	0.367954	0.324708		0.0673529	0.0140097	0.0391295	0.971014	0.904644	0.882059	0.31746	0.194828	0.330618		RGMA	-0.75	0.09	-0.36	-0.12
FAM20A	Maternal	Placenta-specific maternal gDMR	chr17	66596155	66597643	0.00857143	0.00382021	0.00548161	0.930159	0.921924	0.884742	0.445757	0.377886		0.0339918	0.0577762	0.0146184	0.936111	0.935714	0.960626	0.169421	0.206366	0.280697		FAM20A	-2.19	-3.32	-2.93	-3.32
ZNF396	Maternal	Placenta-specific maternal gDMR	chr18	32956510	32957580	0	0.00211313	0.000581395	0.974359	0.900413	0.914408	0.383439	0.448842		0.005	0.00451807	0.0176168	0.97381	0.912412	0.988506	0.615385	0.113636	0.260524		ZNF396	-1.94	0.1	-3.32	-3.32
DNMT1	Maternal	Placenta-specific maternal gDMR	chr19	10303506	10306415	0.0223277	0.0860098	0.0960131	0.850269	0.854056	0.840207	0.357433	0.287879		0.0124748	0.0217391	0.0349525	0.892125	0.658806	0.925518	0.416667	0.204582	0.230603		DNMT1	3.06	2.93	1.49	-0.19
MIR512-1cluster	Maternal	Placenta-specific maternal gDMR	chr19	54150515	54155608	0.0216279	0.175006	0.180799	0.934747	0.965577	0.962929	0.427256	0.336666		0.0642428	0.0204959	0.0344592	0.940089	0.945503	0.952556	0.343925	0.527679	0.350862		MIR512-1cluster	NA	NA	NA	NA
GPR1-AS	Maternal	Placenta-specific maternal gDMR	chr2	207066967	207069445	0	0.0491569	0.0594408	0.955072	0.923712	0.947588	0.39646	0.337745		0.0781609	0	0.0140269	0.897059	0.96026	0.995455	0.0625	0.736706	0.385644		GPR1-AS	-1.24374	-1.07271	-2.10838	-1.66184
MCCC1	Maternal	Placenta-specific maternal gDMR	chr3	182815725	182817627	0.0111684	0.00625568	0.0104647	0.910688	0.953858	0.950813	0.406114	0.300442		0.0259114	0.0181381	0.0322817	0.958498	0.89574	0.877778	0.196053	0.101562	0.405058		MCCC1	2.97	0.32	-1.09	-1.57
PDE4D	Maternal	Placenta-specific maternal gDMR	chr5	58333774	58336554	0.0151766	0.00428571	0.00724049	0.954545	0.756625	0.862571	0.378797	0.502043		0.0217669	0.00438596	0.0162914	0.626633	0.967528	0.936915	0.294836	0.205427	0.192099		PDE4D	-1.6	-1.85	-1.87	-1.82
AIM1	Maternal	Placenta-specific maternal gDMR	chr6	106957945	106961974	0.0235043	0.0092203	0.00875505	0.884898	0.903308	0.92827	0.40035	0.347179		0.00732031	0.019802	0.0537858	0.964862	0.903672	0.909726	0.183293	0.312274	0.389663		AIM1	-2.74	-2.74	-2.17	-2.79
AGBL3	Maternal	Placenta-specific maternal gDMR	chr7	134671024	134672011	0.0191288	0.00606889	0.0015015	0.980952	0.964103	0.994536	0.376907	0.701977		0.0701754	0.0233899	0.0173993	0.923077	0.555556	0.959091	0.882353	0	0.313778		AGBL3	-0.62	-2.02	-3.32	-3.32
ZFAT	Maternal	Placenta-specific maternal gDMR	chr8	135707227	135710114	0.00222222	0.0087492	0.0163683	0.962963	0.811073	0.853678	0.376434	0.513169		0.171745	0.0162097	0.0396396	0.968059	0.934353	0.947893	0.780076	0.464474	0.455347		ZFAT	-1.49	-2.42	-0.7	-1.86
GLIS3	Maternal	Placenta-specific maternal gDMR	chr9	4297279	4300182	0.00595238	0.00476336	0.00455683	0.972414	0.838687	0.911605	0.415394	0.404197		0.0123217	0.00715041	0.0279955	0.966012	0.979638	0.964937	0.182143	0.09375	0.172446		GLIS3	-0.35	-3.32	-0.82	-2.19
DCAF10	Maternal	Placenta-specific maternal gDMR	chr9	37800140	37802937	0.00761589	0.00987935	0.0037359	0.972973	0.840847	0.95625	0.389013	0.536687		0.120662	0.00717822	0.0481213	0.979167	0.935052	0.957223	0.235491	0.433217	0.181217		DCAF10	1.28	0.8	-2.7	-2.78
IGF2-DMR2	Paternal	Secondary DMR (associated with H19 gDMR)	chr11	2153991	2155112	0.133609	0.940227	0.936561	0.0305555	0.63009	0.851515	0.112237	0.0759615		0.0448413	0.0490467	0.0365611	0.0550453	0.0829915	0.0741293	0.010101	0.387246	0.11775		IGF2-DMR2	-3.32193	-3.32193	-2.12503	-3.1363
IGF2-DMR0	Paternal	Secondary DMR (associated with H19 gDMR)	chr11	2168333	2169768	0.0787356	0.934579	0.929455	0	0.0564516	0.0537037	0.044864	0.114935		0.0522634	0.142857	0.0632666	0	0.00798787	0.0376206	0.6	0.103656	0.00740742		IGF2-DMR0	-3.32193	-3.32193	-2.12503	-3.1363
ZC3H12C	Maternal	Secondary DMR (maybe placenta-specific maternal gDMR)	chr11	109962727	109964784	0.0107527	0.00597242	0.00522523	0.877551	0.701152	0.864736	0.382029	0.237938		0.136951	0.00474254	0.00961287	0.923684	0.898509	0.897385	0.003367	0.0336753	0.439438		ZC3H12C	-0.69	0.11	-2.65	-2.93
MEG3	Paternal	Secondary DMR (associated with IG-DMR)	chr14	101290524	101293978	0.0852932	0.00719823	0.00793618	0.118726	0.0218304	0.0315266	0.00927009	0.064877		0.0182903	0.0427019	0.0222039	0.0247624	0.0179422	0.0251336	0.00871776	0.0087741	0.0181336		MEG3	-3.32	-0.16	3.97	0.61
MEG8	Maternal	Secondary DMR (associated with IG-DMR)	chr14	101370741	101371419	0.00411522	0	0.00455426	0.0252101	0.0180556	0.0380952	0.00783071	0.057971		0	0.025	0	0.0195489	0.0225671	0.0306452	0	0.025	0.00859789		MEG8	-3.32	-3.32	-3.32	-2.18
MKRN3	Maternal	Secondary DMR (associated with SNURF gDMR)	chr15	23807086	23812495	0.0654388	0.133088	0.190462	0.526667	0.559156	0.511611	0.118935	0.186037		0.0727596	0.0395646	0.0296591	0.261977	0.202977	0.295971	0.0786325	0.326285	0.321964		MKRN3	0.63	0.16	-1.49	0.45
MAGEL2	Maternal	Secondary DMR (associated with SNURF gDMR)	chr15	23892425	23894029	0.0332143	0.0128229	0.0218657	0	0.0747757	0.0228938	0.0261221	0.0738095		0.00496032	0.119615	0.0505506	0.0395502	0.0229697	0.0497864	0	0.0573548	0.0203185		MAGEL2	-3.32	-3.32	-3.32	-3.32
NDN	Maternal	Secondary DMR (associated with SNURF gDMR)	chr15	23931451	23932759	0.0363409	0.00518078	0.00273698	0.0884354	0.087418	0.119484	0.0094825	0.0135993		0.0167898	0.0180233	0.0427131	0.0802331	0.016994	0.0272835	0.00920657	0.0273859	0.0204439		NDN	3.45	2.68	2.44	1.68
SNRPN-CpG32	Maternal	Secondary DMR (associated with SNURF gDMR)	chr15	24346736	24347142	0	0.0434783	0.00334448	0	0	0.1	0.00434228	0.0287356		0.064	0	0	0.0535714	0.00584795	0.0576355	0	0	0.0925288		SNRPN-CpG32	6.83436	7.61253	-2.45011	-3.32193
SNRPN-CpG29	Maternal	Secondary DMR (associated with SNURF gDMR)	chr15	24671872	24672679	0.030303	0.00245098	0.00151515	0.355556	0.0661325	0.229012	0.0421843	0.0222222		0	0	0.00429253	0.0522436	0.0892073	0.153042	0.25	0.0666667	0.00144928		SNRPN-CpG29	6.83436	7.61253	-2.45011	-3.32193
SNRPN-CpG30	Maternal	Secondary DMR (associated with SNURF gDMR)	chr15	24722753	24723071	0.0181818	0.0105263	0.00404858	0.666667	0.80284	0.621053	0.122791	NA		0	0.2	0.0116704	NA	0.0358556	0.0208333	NA	0.0227273	0.00925928		SNRPN-CpG30	6.83436	7.61253	-2.45011	-3.32193
SNRPN-CpG40	Maternal	Secondary DMR (associated with SNURF gDMR)	chr15	25017924	25018886	0	0.0223881	0.0414863	0	0.0355932	0.0102041	0.0144933	0		0.0472019	0.0243902	0.00588235	0	0.0017094	0.0229382	0.025	NA	0.0119211		SNRPN-CpG40	6.83436	7.61253	-2.45011	-3.32193
SNRPN	Maternal	Secondary DMR (associated with SNURF gDMR)	chr15	25068564	25069481	0.0263158	0.0140897	0.0193122	0	0	0.0142857	0.0178891	0		0	0.1	0	NA	0.0197931	0.0138889	0	0.25	0.00909091		SNRPN	6.83	7.61	-2.45	-3.32
SNRPN	Maternal	Secondary DMR (associated with SNURF gDMR)	chr15	25093008	25093829	0.0185185	0	0.00193798	NA	0.241753	0	0.00692809	0.0277778		0	0	0	0	0.0196078	0	NA	NA	0		SNRPN	6.83	7.61	-2.45	-3.32
SNRPN	Maternal	Secondary DMR (associated with SNURF gDMR)	chr15	25123027	25123905	0.342381	0.00479798	0.00909091	0	0.0221088	0.00775193	0.00543458	0		0.0296053	0	0	0	0	0.0139706	0	NA	0.00892856		SNRPN	6.83	7.61	-2.45	-3.32
ZNF597/NAA60	Paternal	Secondary DMR (associated with SNURF gDMR)	chr16	3492828	3494463	0.0990972	0.00303644	0.00286255	0.163175	0.00551471	0	0.00566079	0.0178174		0.0745512	0.0179487	0.013944	0.0355556	0.030213	0.0257173	0.0323129	0.0133333	0.0221554		ZNF597/NAA60	-2.56555	-0.549977	-0.193689	0.825957
ZDBF2	Paternal	Secondary DMR (associated with GPR1-AS gDMR)	chr2	207114583	207136544	0.125792	0.428799	0.49872	0.0912124	0.0511766	0.0945077	0.0443648	0.107161		0.104237	0.0677088	0.0837766	0.0298377	0.042645	0.0309835	0.0990262	0.0491549	0.0593885		ZDBF2	0.98	0.55	0.36	-0.17
GNAS	Paternal	Secondary DMR (associated with NESP-AS and GNAS-XL gDMRs)	chr20	57414039	57418612	0.00998399	0.00612473	0.00716466	0.124747	0.155105	0.172674	0.0264888	0.0459626		0.0213803	0.0184006	0.0126179	0.0453132	0.0409972	0.0377521	0.00340976	0.0137861	0.0205835		GNAS	7.5	5.64	7.69	7.25
GNAS-Ex1A	Maternal	Secondary DMR (associated with NESP-AS and GNAS-XL gDMRs)	chr20	57463265	57465201	0.00274123	0.00369236	0.00788495	0.0490196	0.100831	0.116755	0.0372891	0		0.0664915	0.00553941	0.0333001	0.0512215	0.0368947	0.022821	0.0526001	0.0233719	0.0302612		GNAS-Ex1A	7.5	5.64	7.69	7.25
WRB	Maternal	Secondary DMR (associated wit no known gDMR)	chr21	40757510	40758276	0.0240401	0.00702372	0.00166113	0.789931	0.117911	0.502363	0.377155	0.444739		0.0268817	0	0.0473045	1	0.94505	0.951066	0.200584	0.21495	0.178916		WRB	5.76	6.04	3.2	3.45
LIN28B	Maternal	Secondary DMR (maybe placenta-specific maternal gDMR)	chr6	105400631	105402559	0	0.0199693	0.0252688	0.9625	0.756394	0.861297	0.324003	0.356977		0	0.111111	0.0117284	1	1	0.912302	0.461538	0.83	0.0520336		LIN28B	4.27	4.52	-2.53	-2.2
