# Supplementary material for: Parental methylome reprogramming in human uniparental blastocysts reveals germline memory transition
Source: HighWire-hosted journal article supplement (doi:10.1101/gr.273318.120), 2021-07-30
Supplement: Supplemental_Table_S5.xlsx [file Supplemental_Table_S5.xlsx]

## Sheet: GG hyper-methylated
Supplementary Table 5. DNA methylation in newly identified DMRs and expression of closest genes (hypermethylated in GG embryos)
				DNA methylation												FPKM
chr	start	end	Closest genes	AG bla rep1	AG bla rep2	AG bla rep3	AG bla merge	GG bla rep1	GG bla rep2	GG bla rep3	GG bla merge	Sperm rep1	Sperm rep2	Oocyte rep1	Oocyte rep2	Gene	AG bla rep1	AG bla rep2	GG bla rep1	GG bla rep2
chr1	1024959	1028796	RNF223	0.186062	0.175439	0.06875	0.122556	0.469565	0.590476	0.666667	0.590368	0.640419	0.777819	0.96874	0.973333	RNF223	0	0	0	0
chr1	2583701	2590707	MMEL1	0.109831	0.175957	0.0356489	0.0938657	0.690054	0.805962	0.583189	0.664348	0.430972	0.38608	0.763661	0.866599	MMEL1	3.52556e-219	0	0	0
chr1	3325499	3327618	ARHGEF16	0.236667	0.030303	0.217391	0.163344	0.0961538	0.666667	0.728572	0.470657	0.535136	0.591042	0.952804	0.864815	ARHGEF16	1.43404	0.360661	4.52366	3.30766
chr1	5772276	5774276	KCNAB2	0.352083	0.125	0.262745	0.21119	0.91	1	0.710526	0.907462	0.467653	0.494668	0.936682	0.967742	KCNAB2	0	0.0459582	0.0370229	0.0146068
chr1	6507526	6510075	TNFRSF25	0.0375	0.0456621	0.00606061	0.0189956	0.590608	0.533333	NA	0.548864	0.0489967	0.0508127	0.899907	0.706876	TNFRSF25	0	0.542693	0.489932	0
chr1	8763273	8765356	RERE	0.00803213	0.0084656	0	0.00952381	0.952381	0.791667	NA	0.820933	0.0186441	0.0183616	0.705486	0.683962	RERE	1.40907	1.11629	1.77134	0.785545
chr1	16268591	16270624	ZBTB17	0.124698	0.030303	0.015	0.0768994	0.636364	1	0.610644	0.832318	0.362459	0.371991	0.942324	0.9278	ZBTB17	1.40393	0.859371	2.23614	1.26436
chr1	16889299	16894135	LOC440570	0.259195	0.13825	0.149904	0.195452	0.514286	0.703125	0.606	0.621026	0.462883	0.665695	0.860654	0.809786	LOC440570	NA
chr1	16945376	16969580	NBPF1	0.16445	0.136097	0.0834692	0.134018	0.317262	0.834622	0.589068	0.656908	0.784649	0.777529	0.904537	0.914912	NBPF1	0.617652	0.817768	1.26077	0.935992
chr1	16974607	16978657	MST1P2	0.0748564	0.0535927	0.00657895	0.0531089	0.363636	0.738667	0.343557	0.563545	0.26198	0.326519	0.679089	0.795455	MST1P2	0.0932682	0	0.0528848	0
chr1	19204044	19206062	ALDH4A1	0.0199275	0.0520833	0.177778	0.0694444	0.588889	0.428571	1	0.64583	0.569976	0.505503	0.946226	0.880208	ALDH4A1	2.75904	0.876378	4.77844	3.05015
chr1	21694306	21696309	ECE1	0.0955882	0.208333	0	0.142432	0.376984	1	0.571429	0.705014	0.637779	0.529701	0.972716	0.95	ECE1	0.320849	0.148988	0.657067	0.260621
chr1	23279555	23281564	LACTBL1	0.0036526	0.0138011	0.0589286	0.0159976	0.764302	0.839744	0.234568	0.743189	0.0428192	0.0351267	0.555866	0.574751	LACTBL1	0	0	0	0
chr1	29516682	29518835	SRSF4	0.0853535	0.180556	0.191667	0.115723	0.8	0.555556	0	0.566667	0.626598	0.75034	0.813267	0.932292	SRSF4	22.0585	15.4829	27.7075	16.0267
chr1	29607822	29611025	PTPRU	0.0206897	0	0.166666	0.0262346	0.583333	0.933333	0.95	0.771958	0.238151	0.307231	0.972101	0.945617	PTPRU	0.893158	0.315552	2.64842	0.819046
chr1	36641934	36643983	TRAPPC3	0.00392156	0	0.222222	0.0233766	0	NA	0.857143	0.622807	0.169102	0.128691	0.863167	0.948643	TRAPPC3	105.349	80.6057	42.5265	89.9716
chr1	40023448	40025448	PPIEL	0.101825	0.151998	0.162453	0.0941292	0.537937	NA	0.37526	0.507871	0.00497512	0.00191571	0.870398	0.869048	PPIEL	0.225903	0.100144	0.158589	0.0984305
chr1	42383642	42385642	HIVEP3	0.00526316	0.025	0.0242424	0.0120513	0.875	1	0.857143	0.870701	0.0398015	0.0574435	0.787212	0.703431	HIVEP3	1.64116	0.285178	0	0.332894
chr1	45268490	45271108	PLK3	0.0543498	0.107143	0	0.0665054	0.359615	0.716667	0.283333	0.46814	0.782433	0.823266	0.947054	0.95943	PLK3	2.30624	4.69106	1.17817	1.76486
chr1	52645081	52648803	ZFYVE9	0.222449	0.281372	0.0388889	0.170517	0.953846	0.989474	0.725	0.720899	0.340218	0.306139	0.811127	0.87963	ZFYVE9	1.4757	2.82252	1.01412	2.25165
chr1	55505095	55507877	PCSK9	0.0290741	0.0218254	0	0.0281027	0.848227	0.923077	0.841667	0.872385	0.0906107	0.082703	0.854147	0.837579	PCSK9	0.266256	0.0221195	0.280389	0.152035
chr1	71048446	71050446	LOC101927244	0.0196078	0	0.25	0.0253623	1	NA	0.888889	0.888889	0.457782	0.698308	0.926667	1	LOC101927244	0	0	0.136832	0
chr1	74719080	74721080	TNNI3K	0.0666667	NA	0	0.0659204	0.769231	0.512821	NA	0.639286	0.179581	0.173919	0.599909	0.743798	TNNI3K	0	5.25057e-15	0	0
chr1	94467336	94469395	GCLM	0.0727273	0	0.166666	0.0829794	0.958333	0	NA	0.754902	0.611593	0.608543	0.907686	0.821131	GCLM	17.992	9.95571	20.6226	15.8748
chr1	102226604	102228604	OLFM3	0.29	0.375	NA	0.238624	NA	1	0.925	0.926923	0.393939	0.379573	0.696429	0.85	OLFM3	0	0	0	0
chr1	109450885	109452910	GPSM2	0.0715238	0.0445987	0.0960127	0.0569651	0.763844	0.928571	0.56294	0.776371	0.150445	0.16303	0.899409	0.956738	GPSM2	1.87351	4.78269	4.20819	4.37999
chr1	114943814	114945814	TRIM33	0.0921053	0	0.597222	0.181129	NA	1	1	1	0.591493	0.503929	0.884184	0.969565	TRIM33	13.8512	7.45692	12.8203	6.92697
chr1	121355196	121357204	EMBP1	0.1	0.15625	0.05	0.0728765	0.723485	0.833333	0.818182	0.58056	0.29835	0.335389	0.515507	0.63161	EMBP1	0	0.0075378	0	0.0847289
chr1	142729612	142731612	ANKRD20A12P	NA	0	0	0	0.928571	0.619048	0.666667	0.685459	0.0232558	0.041129	0.758013	0.75	ANKRD20A12P	1.48221	1.93441	0.418506	1.04391
chr1	148007807	148011756	LOC100132057	0.479122	0.250661	0.297215	0.393662	0.888889	0.78125	0.82381	0.729262	0.591875	0.754386	0.966667	0.958333	LOC100132057	NA
chr1	154957797	154962950	FLAD1	0.108485	0.0387597	0.0697917	0.0972808	0.512069	0.47619	0.611111	0.543659	0.65386	0.687877	0.918653	0.942641	FLAD1	62.5712	38.7096	64.5123	74.3791
chr1	155668558	155670558	DAP3	0.278333	0.25	0.242424	0.215899	0.4	1	0.333333	0.618056	0.524214	0.801084	0.908466	1	DAP3	106.631	117.542	102.749	89.0237
chr1	166890380	166892598	TADA1	0.0252525	0.04	0.0144927	0.0117965	1	NA	0.90625	0.914286	0.12104	0.119549	0.969685	0.953704	TADA1	9.51329	22.6364	9.198	17.1
chr1	178301810	178303810	RASAL2	0.385378	0.197612	0.280434	0.325343	0.481248	0.809524	0.486284	0.592676	0.459973	0.307184	0.875	1	RASAL2	0.244323	0.497242	0.360143	0.199011
chr1	199025437	199027449	PTPRC	0.0942029	0.155556	0.666667	0.146424	0.948718	1	0.833333	0.875635	0.074269	0.108168	0.863618	0.977778	PTPRC	0	0	0	0.0874167
chr1	202163292	202165380	LGR6	0.015873	0.0583333	0.0196078	0.0353422	0.588542	0.366667	NA	0.52963	0.330381	0.340585	0.857374	0.881313	LGR6	0	0.0214431	0	0
chr1	214779947	214783990	CENPF	0.0918239	0	0.045045	0.0444832	0.923077	0.907246	0.893678	0.832818	0.196402	0.202841	0.967391	0.991319	CENPF	10.6247	20.4517	16.916	9.06947
chr1	225802869	225804869	ENAH	0.238095	0.341667	0.0227273	0.203556	0.692308	0.571429	0.778022	0.71898	0.680169	0.68088	0.880303	0.787234	ENAH	7.4757	9.19211	4.9539	3.26772
chr1	227164148	227166575	COQ8A	0.132883	0.133333	0.060606	0.103784	0.630303	0.954545	0.72	0.838971	0.377634	0.674858	0.972396	0.97807	COQ8A	3.28933	2.88629	3.63949	2.21784
chr1	228401693	228406049	C1orf145	0.123693	0.084656	0.165941	0.113639	0.285714	0.763158	0.657222	0.692103	0.69764	0.707617	0.934	0.920298	C1orf145	0.233478	0	0	0
chr1	229283596	229286543	RAB4A	0.115348	0	0.0166667	0.0702131	0.916667	0.888889	0.68	0.866619	0.446377	0.50855	0.980706	0.912381	RAB4A	27.001	11.357	33.8631	19.7197
chr1	242194426	242196426	MAP1LC3C	0.102899	0.0761905	0.030303	0.093125	0.416667	1	0.602564	0.662112	0.30395	0.408511	0.610203	0.817204	MAP1LC3C	0.106621	12.0165	7.19981	5.76026
chr1	243119768	243121804	CEP170	0.171195	0.182405	0.143008	0.125499	0.429507	0.567692	0.392083	0.499846	0.417513	0.352991	0.889483	0.910714	CEP170	1.22848	1.28978	1.06934	0.861155
chr1	245851179	245853625	KIF26B	0.0139566	0.0128205	0.0606061	0.0260355	0.884615	0.989899	0.909091	0.905208	0.0989023	0.0911672	0.916201	0.915591	KIF26B	0	0	0.0181131	0.00416457
chr1	246768657	246770767	CNST	0.0425	0.1375	0.0162601	0.0857031	0.923077	0.975877	0.875	0.949201	0.318446	0.239908	0.887255	0.988095	CNST	2.62535	3.85732	3.25044	3.70753
chr1	247533201	247535482	ZNF496	0.0910364	0.0166667	0.10007	0.10966	0.74881	0.875	NA	0.755729	0.409115	0.749149	0.888043	0.849937	ZNF496	4.95488	1.73058	4.03434	2.93751
chr10	367542	370998	ZMYND11	0.0210714	0.0139062	0.025	0.0322979	0.858333	0.899608	0.909219	0.883332	0.188703	0.182137	0.840169	0.910074	ZMYND11	12.4971	5.12313	10.0008	6.62988
chr10	1369428	1371490	ADARB2-AS1	0.490896	0.268518	0.367939	0.398951	0.992063	0.984137	1	0.984222	0.289691	0.249892	0.904702	1	ADARB2-AS1	0	0	0	0
chr10	1755154	1757473	ADARB2	0.181609	0.16994	0.0324074	0.123107	0.75	1	1	0.842105	0.799379	0.870671	0.901454	0.982927	ADARB2	0	0	0.0780055	0
chr10	27702277	27704277	PTCHD3	0.0174863	0.0133333	0	0.0102564	1	0.944444	0.933333	0.946667	0.00295911	0.00087108	0.961079	0.942029	PTCHD3	0	0	0	0
chr10	29060387	29062430	C10orf126	0.166667	0.104167	0.0781249	0.0861472	0.417582	NA	0	0.338068	0.253813	0.138652	0.481061	0.42402	C10orf126	0	0	0	0
chr10	36652346	36654346	PCAT5	0.134722	0.158333	0.0744777	0.0978741	0.512319	0.861111	0.145068	0.391448	0	0.00465116	0.132902	0.238618	PCAT5	0	0	0	0
chr10	42400393	42402393	LOC441666	0.160053	0.116469	0.210316	0.168124	0.552381	0.438095	0.592917	0.509544	0.341226	0.312841	0.6398	0.587797	LOC441666	1.21281	0.22522	0.457049	0.651469
chr10	49658226	49660229	ARHGAP22	0.0113035	0.00602772	0	0.00751366	0.758621	0.703704	0.444595	0.621	0.0738015	0.0781455	0.940545	0.950163	ARHGAP22	0	0.170336	0.0599044	0.25158
chr10	71265777	71267777	TSPAN15	0.0439814	0	0.1901	0.0847602	0.8875	NA	0.6	0.698809	0.726598	0.728924	0.839692	0.962963	TSPAN15	68.756	2.99017	10.7795	36.2966
chr10	93976209	93978209	CPEB3	0.188834	0.130952	0.476191	0.251959	0.8	0.969697	0.9161	0.902623	0.554503	0.549885	0.903912	0.948649	CPEB3	0.847587	1.21359	1.43501	0.719541
chr10	114370502	114372502	VTI1A	0	0	0.047619	0.109333	0.5	1	NA	0.833333	0.285226	0.35607	0.919118	0.959677	VTI1A	7.83172	12.496	10.0501	10.1412
chr10	118999757	119002945	SLC18A2	0	0.166667	0	0.0273488	0.928571	0.555556	NA	0.768095	0.0247795	0.0360519	0.762488	0.751337	SLC18A2	1.73855	0.413984	1.12062	0.445476
chr10	120542428	120545312	CACUL1	0.100298	0.139352	0.152222	0.0858169	0.733333	0.916667	0.355072	0.484021	0.430949	0.331646	0.716082	0.582456	CACUL1	8.2511	14.0817	7.22427	13.408
chr10	121577908	121579910	INPP5F	0.0601852	0.0480226	0	0.0372078	1	1	NA	1	0.00999888	0.00889058	0.944298	0.933333	INPP5F	22.1942	41.3034	52.3619	27.2086
chr10	123574776	123576776	ATE1	0.0753967	0	0.111111	0.0599702	0.928571	0.857143	NA	0.753907	0.59068	0.506785	0.899107	0.911111	ATE1	10.6598	15.1957	13.9006	15.9399
chr10	123909536	123913720	TACC2	0.240476	0.216667	0.0666667	0.114854	0.481481	0.979167	0.447917	0.65692	0.537064	0.609479	0.851011	0.904762	TACC2	1.02395	0.931695	4.45011	1.17687
chr10	133458090	133460109	PPP2R2D	0.0175256	0.0136986	0.00653594	0.0141658	0	0.265928	0.854545	0.170439	0.0815955	0.0597214	0.507643	0.463492	PPP2R2D	8.87244	7.93197	9.52813	5.65829
chr10	134499868	134502606	INPP5A	0.172006	0.211111	0	0.125463	0.643678	1	0.928571	0.755574	0.725971	0.751163	0.979592	0.940826	INPP5A	5.37336	1.54064	8.4585	6.89736
chr10	135278300	135280976	SCART1	0.0953333	0.0251938	0.0971014	0.0987619	1	0.95	0.986111	0.87004	0.282221	0.301851	0.974604	0.906131	SCART1	0.0222481	0	0.0273382	0.0315298
chr11	1449771	1452050	BRSK2	0.297105	0.402611	0.288021	0.298076	1	0.989662	0.487795	0.798988	0.622959	0.804478	0.92085	0.927083	BRSK2	0.0268625	0	0.0329885	0.0228905
chr11	2721577	2723632	KCNQ1OT1	0.0391667	0.0354167	0	0.0242216	NA	1	0.815568	0.830037	0.114984	0.13267	0.98657	0.915765	KCNQ1OT1	0.100888	0.0151919	0.0266182	0.00138235
chr11	3435139	3437203	TSSC2	0.0788647	0.0358974	0.00925928	0.0512433	1	1	0.683333	0.797152	0.289353	0.451263	0.844591	0.881783	TSSC2	0	0.144662	0	0.144059
chr11	4137078	4139318	RRM1	0.308333	0.4	0.333334	0.200725	0.4	1	0.76	0.724242	0.177397	0.191681	0.864979	0.973214	RRM1	45.1376	150.704	47.2791	105.462
chr11	6590994	6594400	RRP8	0.0277778	0	0.00833333	0.02411	0.494792	0.625333	0.208333	0.461436	0.220842	0.22868	0.802858	0.770497	RRP8	15.6817	17.0134	16.5807	28.6122
chr11	7870735	7872940	LOC283299	0.148148	0.666667	0	0.116667	0.75	1	NA	0.875	0.67471	0.786913	0.918332	0.962963	LOC283299	0	0	0	0.117343
chr11	8751690	8753696	LOC102724784	0.0137931	0	0.0123457	0.0222833	0.809524	0.958333	0.777778	0.846667	0.109382	0.12404	0.948913	0.990196	LOC102724784	0	0	0.505248	0.0408711
chr11	14273862	14276047	RRAS2	0.0324074	0	0.0637255	0.0799886	1	NA	1	1	0.36257	0.335975	0.912332	0.987179	RRAS2	53.4286	38.397	50.6089	47.6716
chr11	19366587	19368731	NAV2	0.0188355	0.0320513	0	0.0177598	0.877273	1	0.954545	0.945767	0.00282087	0.00320513	0.941387	0.952174	NAV2	0.238503	0.284287	1.49736	0.636027
chr11	19735643	19737643	LOC100126784	0.1	0.177778	0	0.0847458	0.710345	1	0.716667	0.793067	0.126008	0.131027	0.905141	0.95875	LOC100126784	0	0	0	0.0832944
chr11	34193789	34195789	NAT10	0.338462	0.1	0.0555555	0.252265	NA	0.944444	1	0.927273	0.657173	0.672395	0.913395	0.934211	NAT10	5.94467	4.71625	6.90235	11.4952
chr11	39980566	39982598	LRRC4C	0.164405	0.123029	0.144636	0.127614	0.354205	1	0.562173	0.569067	0.272854	0.308108	0.990196	0.947917	LRRC4C	0	0	0.044793	0
chr11	44088007	44090048	ACCS	0.0114942	0	0	0.0115304	0.923077	1	NA	0.9375	0.085005	0.11136	0.716418	0.858889	ACCS	0	0	0	0
chr11	48492924	48495471	OR4C45	0.4125	0	0.222222	0.37594	1	1	0.753969	0.923512	0.431895	0.454568	0.838691	0.979167	OR4C45	0	0	0	0
chr11	51582920	51584925	LOC646813	0.216828	0.208532	0.047619	0.151654	0.765278	0.757692	0.731482	0.769903	0.373499	0.425744	0.750965	0.645799	LOC646813	0	0	0	0
chr11	57711129	57713129	OR9Q1	0.227679	0.246795	0.0972222	0.166482	0.916667	1	0.541667	0.728175	0.600685	0.217281	0.741319	0.848485	OR9Q1	0	0	0	0
chr11	67654081	67656101	FAM86C2P	0	0	0.0931372	0.0393939	1	0.909091	NA	0.9125	0.123628	0.199683	0.932952	0.92029	FAM86C2P	0.554598	0.480374	0.467115	0.127973
chr11	68538344	68542843	TESMIN	0.0646667	0.0444444	0.0303571	0.0873935	0.694445	0.857143	0.848039	0.760923	0.323846	0.331438	0.921703	0.952921	TESMIN	0.773073	0.209105	0.488211	0.231388
chr11	73372409	73374453	PLEKHB1	0	0	0.0138889	0.0201613	1	1	1	0.983333	0.103648	0.106507	0.940563	0.951108	PLEKHB1	0	0.640849	1.91895	0.366285
chr11	76631438	76633822	ACER3	0	NA	0	0	1	1	1	0.711111	0.731825	0.832943	0.928571	1	ACER3	5.15508	3.23717	2.34268	2.44625
chr11	82212099	82214483	PRCP	0.143333	0.14902	0	0.0738662	0.75	1	0.846667	0.815476	0.462298	0.251127	0.857011	0.901543	PRCP	2.67273	6.84163	3.24193	3.76141
chr11	106697442	106700391	GUCY1A2	0	0	0.122222	0.0869792	0.777778	NA	NA	0.870833	0.249211	0.209522	0.957373	0.916667	GUCY1A2	0	0.0113882	0.080505	0
chr11	119227098	119229127	USP2	0.0625396	0	0.191964	0.05383	0.75	NA	0.8125	0.777451	0.17751	0.168927	0.953801	0.893939	USP2	0.520514	0.246658	0.900048	0.342173
chr11	122099223	122101248	UBASH3B	0.0851504	0.15625	0.0196078	0.0619338	0.75	1	0.952381	0.835556	0.313427	0.327947	0.978095	0.91954	UBASH3B	1.84691	8.4472	3.09318	2.67838
chr11	130468658	130470754	C11orf44	0.225439	0.321429	0	0.171599	0.75	1	0.824242	0.778947	0.531889	0.510522	0.811429	0.892	C11orf44	0	0.181791	0	0
chr11	130589739	130592172	C11orf44	0.188	0.133333	0.0222222	0.130962	0.833333	0.989011	0.166666	0.872993	0.473817	0.495135	0.775466	0.633712	C11orf44	0	0.181791	0	0
chr11	133994763	133996879	JAM3	0.146809	0.102159	0	0.156713	0.896429	NA	0.953846	0.901667	0.484707	0.528594	0.868875	0.94697	JAM3	2.22728	1.61372	2.0955	2.34616
chr11	134156497	134158497	GLB1L3	0.0762695	0.121667	0.0750817	0.0603663	0.210714	0.669048	0.71818	0.477264	0.0115627	0.00576131	0.552917	0.382635	GLB1L3	1.06932	0.599664	0.84456	0.446804
chr12	2800300	2802312	CACNA1C-AS1	0	0	0.0125	0.00172117	0	0.862745	0.733333	0.79198	0.0265699	0.0337054	0.69152	0.864431	CACNA1C-AS1	0	0	0	0
chr12	4140971	4143321	PARP11	0.08	0.128205	0	0.0476191	0.962963	0.5	NA	0.682407	0.21226	0.258775	0.391277	0.399645	PARP11	0.912469	1.07302	1.91342	1.37374
chr12	5936579	5938643	ANO2	0.104167	0.0833333	NA	0.058	0.916667	1	NA	0.988095	0.137021	0.134734	0.959325	0.943841	ANO2	0.14942	0.0173245	0.0366323	0.0339792
chr12	9108745	9110745	KLRG1	0.0227273	0	0.05	0.0657658	0.583333	1	0.5	0.689223	0.155346	0.168351	0.990972	0.901961	KLRG1	0.716321	0.363973	1.00661	0.308832
chr12	13292708	13295213	GSG1	0.447772	0.468908	0.327778	0.331219	0.486667	0.909091	0.9	0.717695	0.818754	0.816239	0.931944	0.971014	GSG1	0	0.0741551	0.0588148	0.132925
chr12	13717159	13719203	EMP1	0.196078	0.125	0.107937	0.141319	NA	1	NA	0.952381	0.484321	0.587862	0.964319	0.916141	EMP1	0.0201272	0	0	0
chr12	16666469	16669101	LMO3	0.489583	1	0.183333	0.324634	1	1	NA	1	0.640849	0.69599	0.876206	0.874411	LMO3	0.146605	0	0	0.0741958
chr12	34362505	34364505	ALG10	0.0865591	0.0555555	0.0535714	0.0726292	0.875	NA	0.333333	0.728778	0.180539	0.175554	0.736139	0.838657	ALG10	0.617386	1.61968	0.395759	1.07127
chr12	49176474	49178474	ADCY6	0.0448529	0.0138889	0	0.0371134	0.890787	0.888889	0.489286	0.774838	0.281582	0.426677	0.969972	0.926471	ADCY6	0	0	0.0652741	0
chr12	53343020	53345053	KRT18	0.146825	0.363636	0.337037	0.24012	0.263158	0.925397	0.916667	0.686312	0.317525	0.324831	0.491923	0.61875	KRT18	2105.34	1104.1	3393.65	2709.36
chr12	56879125	56882137	GLS2	0.0128205	0.009009	0.117901	0.0290229	0.8	0.316755	0.125	0.423277	0.0820768	0.117522	0.334463	0.411042	GLS2	0	0.116625	0.246066	0
chr12	58158821	58160821	CYP27B1	0.00990991	0	0	0.00925926	0.618	1	NA	0.599381	0.00200494	0.00126263	0.825409	0.786667	CYP27B1	0.45869	0.427131	0.845254	0.485873
chr12	58177526	58179689	TSFM	0.215952	0.127778	0.030303	0.14447	1	0.892857	0.73	0.775505	0.563829	0.581474	0.92	0.990741	TSFM	54.6072	71.96	100.658	80.3172
chr12	65219474	65221474	TBC1D30	0.057598	0.25	0	0.0310955	0.625	1	1	0.804	0.0280017	0.0458372	0.924172	0.922481	TBC1D30	0.0205491	0.0556364	0.218856	0.015476
chr12	99926207	99928329	ANKS1B	0.268889	0	NA	0.203125	NA	1	0.75	0.927579	0.224093	0.348159	0.838889	0.964286	ANKS1B	0.0971851	0.0079854	9.60288e-06	1.22515e-247
chr12	104659157	104661334	TXNRD1	0.0225225	0.011646	0.05	0.0461353	0.894737	1	1	0.898517	0.0427326	0.132308	0.971212	0.989583	TXNRD1	88.5246	88.5765	104.729	83.2233
chr12	122431781	122433781	BCL7A	0.0429293	0.104902	0.23837	0.15289	0.513333	0.911111	0.534375	0.629979	0.176871	0.539216	0.35	0.766667	BCL7A	1.73959	1.54597	1.86338	3.11969
chr12	124521759	124523759	ZNF664-FAM101A	0.0208333	0.025641	0	0.0305556	NA	0.897436	0	0.896795	0.143818	0.151852	0.951613	0.970714	ZNF664-FAM101A	0.000324776	0.000392825	3.40021e-05	0.0569033
chr12	124940752	124942752	NCOR2	0.143871	0.176656	0.0201094	0.161149	0.529412	1	0.846154	0.781349	0.709939	0.699895	0.890129	0.979167	NCOR2	0.738069	0.217655	1.27175	0.13322
chr12	127212371	127214371	LOC100996671	0.0293651	0	0	0.0228022	NA	0.130952	0.9	0.333333	0.0695864	0.0591462	0.595778	0.531874	LOC100996671	0	0	0	0
chr13	25080919	25082993	PARP4	0.046875	0	0.0930555	0.0581179	0.8	0.928571	NA	0.863393	0.18021	0.176053	0.973768	0.978495	PARP4	0.550532	0.936714	0.804492	0.741501
chr13	33002029	33006322	N4BP2L1	0.188889	0.0729167	0.0833333	0.119032	0.410053	1	0.939394	0.892632	0.395962	0.415792	0.931062	0.911616	N4BP2L1	0	0.338749	0	0.0631014
chr13	46188528	46192028	ERICH6B	0.0473214	0.109375	0.0114943	0.0561536	1	0.75	0.714286	0.883929	0.327403	0.376801	0.887246	0.848379	ERICH6B	0	0	0	0
chr13	47909580	47911580	HTR2A	NA	NA	0	0	0.8	NA	NA	0.8	0.420073	0.426886	0.846154	0.875	HTR2A	0	0.0269788	0	0
chr13	53508028	53511564	PCDH8	0.0461538	0.0370371	0.114286	0.0411967	0.857143	0.5	1	0.8125	0.366524	0.39204	0.952381	0.945	PCDH8	0	0.121231	0.0366165	0.110171
chr13	60842076	60844133	DIAPH3	0.0561224	0.12963	0	0.0417163	1	1	0.791667	0.869643	0.283086	0.304138	0.939427	0.840278	DIAPH3	11.0041	8.21305	10.5405	11.4847
chr13	64649235	64651390	LOC102723968	0.126984	0	0.0113636	0.0288246	0	0.25	0.877345	0.510101	0.0176031	0.0320015	0.457476	0.589217	LOC102723968	0	0	0	0.0114867
chr13	97942652	97944786	MBNL2	0.183174	0.147436	0.0636364	0.0921428	0.962963	0.641026	NA	0.77931	0.0566856	0.137197	0.814363	0.989247	MBNL2	0.451925	0.0966819	0.146108	0.337308
chr13	101202406	101204406	GGACT	0	0.133333	0.183334	0.117927	0.879464	NA	0.25	0.84344	0.53686	0.664813	0.904762	0.93018	GGACT	1.16425	0.731273	1.17721	1.18524
chr13	112708131	112712155	SOX1	0.00357143	0.00854701	0	0.00382096	0.543077	0.933333	NA	0.590569	0.00341501	0.00559887	0.836011	0.781383	SOX1	0	0	0	0
chr13	112785388	112787836	LOC100506016	0.131299	0.310145	0	0.130956	0.624155	0.857143	1	0.697151	0.199692	0.216641	0.970602	0.973118	LOC100506016	0	0	0.0845294	0
chr13	114454566	114456588	TMEM255B	0.00877193	0	0.111527	0.0411977	0	0.536667	0.638958	0.505561	0.0086952	0.0041555	0.243354	0.440018	TMEM255B	0.127638	0.374416	0.470032	0.0757166
chr13	114964632	114966827	CDC16	0.0214039	0.0309278	0.0110731	0.0168638	0.186517	0.671389	0.437301	0.442758	0.0054972	0.00893463	0.553211	0.327137	CDC16	35.0934	24.0532	31.3653	47.797
chr14	19624881	19626881	DUXAP10	0.068723	0.107143	0.0384615	0.0634921	0.848485	1	NA	0.890909	0.086474	0.0825397	0.8	0.666667	DUXAP10	NA
chr14	19949382	19951382	DUXAP10	0	0	NA	0.0166667	0.916667	0.6	NA	0.72128	0.0614583	0.191995	0.708333	0.744444	DUXAP10	NA
chr14	21917129	21919189	CHD8	0.211111	0.6	0	0.112698	NA	1	1	1	0.327429	0.415189	0.9	0.821429	CHD8	2.14642	0.891376	0.917497	0.510924
chr14	24780188	24782188	CIDEB	0.0071875	0.0110577	0	0.0529982	NA	0.875	0.74359	0.847475	0.0654078	0.0712052	0.930673	0.950206	CIDEB	1.10724e-113	4.103e-71	2.27292e-99	2.4742e-171
chr14	37130937	37132937	PAX9	0.129699	0.108527	0	0.0908733	0.891667	0.894737	0.8	0.878947	0.00347553	0.00148473	0.849076	0.803961	PAX9	0.126176	0.0628836	0	0.185001
chr14	54669139	54671619	CDKN3	0.252876	0.241259	0.311111	0.202701	0.694218	0.492754	0.736752	0.72425	0.170098	0.149751	0.914024	0.833333	CDKN3	113.711	168.836	188.208	125.209
chr14	61108839	61111045	SIX1	0.018018	0	0.0197368	0.0267219	0.519167	NA	0	0.598845	0.00729426	0.00438114	0.667872	0.575728	SIX1	0.042159	0	0.103589	0.108455
chr14	65570804	65572804	MAX	0	0.333333	0.666667	0.193939	0.25	0.952381	0.5	0.62577	0.538406	0.552769	0.966112	0.901563	MAX	58.4514	90.2348	60.4813	107.842
chr14	65937258	65939275	FUT8	0.3	NA	0.0648148	0.186012	0.625	NA	NA	0.625	0.262651	0.276518	0.96875	0.95	FUT8	17.9763	10.6991	14.2328	21.5145
chr14	73713606	73716270	PAPLN	0.128486	0.227812	0.214912	0.151588	NA	0.863636	0.16	0.643788	0.627698	0.678145	0.838759	0.82906	PAPLN	0.0463844	0.0323086	0.136797	0.0105014
chr14	87371755	87373805	LOC283585	0	0.0666667	0	0.0155357	1	0.253205	0.666667	0.230195	0.0434087	0.071987	0.155401	0.444715	LOC283585	0	0	0	0
chr14	91327638	91329663	TTC7B	0.182143	0	0.0264706	0.107488	0.333333	0.819445	0.401389	0.678732	0.733812	0.779563	0.916667	0.933333	TTC7B	7.3545	1.78782	12.3522	5.7603
chr14	99640827	99644004	BCL11B	0.0182569	0.0210145	0	0.015964	0.901316	0.914634	0.5	0.876951	0.0627586	0.0629373	0.954176	0.951136	BCL11B	0	0	0.0504698	0
chr14	100758976	100761034	SLC25A29	0.0365801	0.0493827	0.05	0.0390795	1	0.888889	0.875862	0.89646	0.237414	0.239531	0.942569	0.889796	SLC25A29	5.99479	5.45588	19.6362	7.64475
chr14	102391580	102393628	DYNC1H1	0	0	0	0	NA	1	0	0.761905	0.126677	0.114385	0.771215	0.873585	DYNC1H1	1.86716	2.63379	2.31282	2.29912
chr14	102701325	102703325	MOK	0.162698	0.297619	0.111403	0.157068	0	0.86	0.878788	0.700769	0.459781	0.522324	0.953624	0.960641	MOK	0.634879	1.01107	2.61447	0.933769
chr14	104717235	104719423	KIF26A	0.00812808	0.0344203	0.0183326	0.0164868	0.669928	0.920952	0.440355	0.692376	0.2342	0.248165	0.940899	0.966667	KIF26A	0.278836	0.110955	0.0587405	0.162151
chr15	27901837	27903873	OCA2	0	0	0.0268817	0.0106732	NA	0.5	0.753333	0.50528	0.00992063	0.0196487	0.346303	0.366931	OCA2	0	0.637231	0.22441	0.254092
chr15	40268633	40270721	EIF2AK4	0	0.0133333	0	0.00684079	0.875758	1	1	0.962078	0.0305452	0.029321	0.978723	0.931034	EIF2AK4	13.4139	7.99163	7.28442	6.54136
chr15	41673752	41675933	NDUFAF1	0.239971	0.246007	0.109649	0.109366	0.952381	0.791667	0.235507	0.486482	0.04625	0.19375	0.904762	0.75	NDUFAF1	35.1524	56.0665	62.4193	87.0556
chr15	50801566	50803660	USP50	0.108696	0.213542	0.222222	0.127353	0.969697	1	0.733333	0.932692	0.0529328	0.132636	0.925702	0.977778	USP50	0.186649	1.58692e-180	0	0.0262064
chr15	51195432	51197432	AP4E1	0.196231	0.104464	0.301317	0.201116	0.416667	NA	0.578182	0.66208	0.31317	0.292562	0.868993	0.933333	AP4E1	2.30965	2.22634	1.76168	1.74709
chr15	58634592	58636592	LIPC	0.037037	0	0	0.0222222	0	1	NA	0.733333	0.465077	0.466787	0.991071	0.97619	LIPC	0.450075	0.4816	0.368507	0.239192
chr15	64994360	64997424	OAZ2	0.0875	0.0615079	0.0571428	0.0609184	0.800694	0.910256	0.301724	0.720428	0.0917648	0.120626	0.771418	0.78588	OAZ2	12.9226	6.3611	2.23716	0.85716
chr15	77314838	77317588	PSTPIP1	0.0769231	0.122549	0	0.104533	0.666667	0.656061	NA	0.657143	0.394436	0.409298	0.809565	0.891304	PSTPIP1	0.100442	0	0	0
chr15	81451004	81454647	CFAP161	0.0444444	0	0	0.0457418	0.916667	1	0.928571	0.934641	0.17366	0.206387	0.648553	0.888889	CFAP161	0	0.178887	0	0
chr15	90844349	90846349	CIB1	0.0119048	0.030303	0	0.0240363	0.77	1	NA	0.75	0.248616	0.200705	0.965345	0.98	CIB1	94.0844	207.889	229.297	137.233
chr15	91814131	91816131	SV2B	0.176786	0.207936	0.38	0.148722	0	NA	0.947759	0.742778	0.619325	0.590123	0.918541	0.966667	SV2B	0.00470371	0	0.0246906	0
chr15	93609055	93611581	RGMA	0.490018	0.562821	0.215432	0.380465	0.9	0.933333	0.923077	0.898374	0.478161	0.420987	0.965111	0.904372	RGMA	0.493688	0.965592	0.680227	0.818297
chr15	93897210	93899242	RGMA	0.170488	0.137294	0.183125	0.18135	0.44027	NA	0.440981	0.505672	0.273673	0.314975	0.925151	0.915556	RGMA	0.493688	0.965592	0.680227	0.818297
chr15	101094605	101100008	PRKXP1	0.568562	0.643991	0.162401	0.434394	0.86935	0.0526316	0.916667	0.839455	0.356208	0.376066	0.880313	0.888515	PRKXP1	0.00690833	0.0213669	0.12452	0.064913
chr15	102286499	102288499	LOC100128108	0.1511	0.17087	0.229819	0.173816	0.45614	NA	0.680676	0.628225	0.30629	0.281929	0.587447	0.64246	LOC100128108	0.338698	0.897239	0.819957	0.110059
chr16	857396	859626	PRR25	0.0851449	0.17193	0	0.0404953	NA	1	0.522727	0.726923	0.156151	0.165194	0.723158	0.79411	PRR25	0.0523993	0	0	0
chr16	1545991	1548007	TELO2	0.143403	0.267677	0.125641	0.165881	NA	0.942857	0.666667	0.884434	0.434359	0.491141	0.928779	0.952675	TELO2	1.52335	0.233542	1.60429	0.943933
chr16	3190769	3192769	CASP16P	0.12186	0.200479	0.0208333	0.0770574	0.6	0.696296	0.366666	0.678142	0.278207	0.287566	0.924144	0.978136	CASP16P	0	0	0	0
chr16	7524065	7526065	RBFOX1	0.0666666	0	0	0.0227513	NA	0.711111	NA	0.7	0.295292	0.418459	0.905728	0.833333	RBFOX1	0.0354647	0.0798027	0	0.0601595
chr16	10133156	10135972	GRIN2A	0.186591	0.154545	0.0625	0.151671	0.762987	1	0.827381	0.858145	0.297976	0.318464	0.860356	0.941176	GRIN2A	0.0113379	0.0482131	0.213672	0.114989
chr16	14456230	14458536	LOC105447648	0.142894	0.123188	0.0333333	0.135639	0.641667	NA	0.866667	0.78019	0.553633	0.596648	0.930823	0.967836	LOC105447648	0	0	0	0
chr16	19200333	19202496	SYT17	0.0368421	0.0208333	0	0.0411111	0.666667	0.733333	0.923077	0.836842	0.445857	0.497391	0.922807	1	SYT17	0.019219	0.730857	0.706001	0.368601
chr16	31071781	31073781	ZNF668	0.0804905	0.0476191	0.0118518	0.0571072	0.661111	0.942529	0.850877	0.860998	0.00906258	0.0181161	0.934932	0.949025	ZNF668	2.55604	0.861851	2.30301	2.23115
chr16	70083654	70087731	PDXDC2P	0.119082	0.179577	0.107046	0.16742	0.598214	0.605856	0.504386	0.504828	0.415793	0.770052	0.628205	0.932432	PDXDC2P	0.545155	0.489846	0.534993	1.28135
chr16	70412378	70414497	DDX19A	0.0270833	0	0.0243055	0.0291667	0.363636	0.833333	0.333333	0.406713	0.0239762	0.0495346	0.616098	0.570748	DDX19A	10.4864	9.51969	13.831	19.2425
chr16	75513109	75515291	TMEM170A	0.0537878	0.0437158	0.0182051	0.0526906	0.827586	0.945455	0.883333	0.864448	0.187134	0.201081	0.974834	0.964815	TMEM170A	24.913	20.8532	14.7902	23.1824
chr16	75723473	75725473	TERF2IP	0.357118	0.20391	0.162448	0.260905	0.398487	0.498122	0.392806	0.409429	0.453217	0.442774	0.567749	0.673935	TERF2IP	7.1136	7.62131	17.8682	15.8089
chr16	81698187	81702146	PLCG2	0.0877976	0.120952	0.0757576	0.0828703	0.558333	0.928571	0.588542	0.73408	0.721677	0.843804	0.932377	0.975823	PLCG2	0.263914	0.2065	0.527974	0.346467
chr16	84027691	84031507	NECAB2	0.19023	0.0883333	0.0930555	0.131185	0.492063	0.541667	0.958333	0.617866	0.674843	0.672211	0.861375	0.787671	NECAB2	0	0.0891138	0	0
chr16	85624068	85626068	GSE1	0.0965909	0.0361111	0	0.0578277	0.181818	0.711111	0.53125	0.429167	0.497551	0.762702	0.920406	0.940252	GSE1	4.96652	1.93848	6.3964	2.63816
chr16	89345398	89349439	LOC100287036	0.022792	0.0175439	0.0390411	0.0356595	0.470334	0.885965	0.795062	0.70683	0.069573	0.177629	0.814298	0.832059	LOC100287036	0	0	0	0
chr16	89911364	89921156	SPIRE2	0.140407	0.217352	0.0902357	0.154918	0.639617	0.901189	0.767353	0.726663	0.774541	0.756776	0.928309	0.956462	SPIRE2	0.154838	0.0400065	2.40971	0.568567
chr17	105182	108682	LOC100506371	0.589705	0.481602	0.598523	0.578699	0.852276	0.91907	0.842593	0.880771	0.462366	0.456978	0.877808	0.861789	LOC100506371	0	0	0.221758	0
chr17	520798	522999	VPS53	0.0483183	0.0529412	0.0335821	0.0486629	0.671569	0.899451	0.627983	0.776732	0.0443517	0.0200606	0.920245	0.957118	VPS53	0.502928	0.940255	0.670747	1.56581
chr17	933191	935216	ABR	0.0383928	0.0246914	0	0.0448636	0.390476	0.6125	0.813333	0.746646	0.300377	0.313902	0.866522	0.935185	ABR	3.81006	1.10672	6.9149	3.15474
chr17	1079167	1083394	ABR	0.0728995	0.0682795	0.0277778	0.0520723	0.354167	0.666286	0.536458	0.589069	0.261042	0.252653	0.662533	0.705508	ABR	3.81006	1.10672	6.9149	3.15474
chr17	3235720	3237840	SPATA22	0.15	0.05	0.17	0.132857	NA	NA	0.88	0.883333	0.779219	0.769853	0.89899	0.926471	SPATA22	1.17849	0.424374	0	0.148838
chr17	6900422	6902422	ALOX12	0.201389	0.194444	0.0833334	0.129304	NA	0.444444	0.833333	0.515152	0.548729	0.658026	0.840842	0.907407	ALOX12	0.413348	0.254788	0.0597395	0.473901
chr17	7311723	7313755	NLGN2	0.0310606	0.177976	0.0205357	0.0525509	0.861111	0.884058	0.75	0.845679	0.25323	0.27168	0.944977	0.95068	NLGN2	0.0117616	0.0273213	0	0.00667096
chr17	7754582	7757328	CYB5D1	0.00454545	0.0112179	0	0.00515406	0.166667	0.533457	0.418605	0.474282	0.00445032	0.00549186	0.919355	0.897183	CYB5D1	3.45508	1.73233	2.61132	3.35692
chr17	18514994	18516994	CCDC144B	0.194444	0.190476	0.0764706	0.173579	0.76	NA	NA	0.76	0.261895	0.50865	1	1	CCDC144B	0.258653	0.23127	0.482143	0.407677
chr17	21514957	21518324	C17orf51	0.0453846	0.0194444	0.0243055	0.0559524	0.8	0.571429	0.52	0.472917	0.196004	0.119417	0.512915	0.564586	C17orf51	0.859967	0.377139	0.782206	0.619572
chr17	22244798	22246798	FLJ36000	0.186763	0.17066	0.110094	0.14991	0.717105	0.703947	0.505372	0.653394	0.338593	0.261072	0.562207	0.611559	FLJ36000	0.0727233	0.0338045	0.0714846	0
chr17	25485666	25487678	LOC105371703	0	0	0	0.0128205	0.8	NA	1	0.556122	0.409101	0.408617	0.543036	0.692308	LOC105371703	0	0	0	0
chr17	33922525	33926130	AP2B1	0.0873016	0	0	0.0527569	NA	0.961905	NA	0.946795	0.107993	0.110967	0.91339	0.972595	AP2B1	15.8841	12.6938	11.9693	26.0181
chr17	41270926	41274751	BRCA1	0.00724637	0.0238095	0.0448179	0.0120656	1	0.925	NA	0.955019	0.254078	0.284422	0.937002	0.855864	BRCA1	3.41244	3.7656	5.45799	3.99989
chr17	55961706	55963849	CUEDC1	0	0	0.0337838	0.00993589	0.887755	0.946429	0.898039	0.925571	0.0358328	0.0693258	0.965044	0.971631	CUEDC1	0	0	0	0
chr17	61514131	61516343	CYB561	0.0060606	0	0	0.002	NA	0.933333	0.430556	0.607143	0.0125301	0.00930752	0.90256	0.921053	CYB561	0.564299	1.57553	1.24794	1.10588
chr17	70549413	70551763	LOC146795	0.149358	0.092717	0.223684	0.190037	0.833333	0.652778	0.5	0.658516	0.215035	0.532275	0.864782	0.719512	LOC146795	0	0	0	0
chr17	73890020	73892057	TRIM65	0.107102	0.177273	0.0151515	0.0801412	0	0.782051	0.457778	0.481488	0.639962	0.678038	0.954174	0.955729	TRIM65	0.809671	0.0767257	0.162179	0.58893
chr17	74302777	74305358	QRICH2	0.108411	0.0684524	0.015625	0.0623907	0.75	0.969388	0.979167	0.90236	0.138407	0.145253	0.940836	0.936161	QRICH2	0.256454	0.217116	1.08837	0.0934733
chr17	76670700	76674801	CYTH1	0.152294	0.0427928	0.0815602	0.125853	0.857143	0.884259	0.848148	0.844355	0.761213	0.725101	0.937183	0.969171	CYTH1	0.762644	1.17618	2.77087	1.29403
chr17	79183397	79185397	CEP131	0.0537634	0.102564	0.0513513	0.0690123	0.53125	0.714286	0.68114	0.624561	0.254923	0.433922	0.943711	0.913158	CEP131	2.779	0.49047	3.34155	0.866567
chr17	79372263	79374277	BAHCC1	0.0575757	0.158333	0	0.0296187	0.4375	1	0.85	0.591667	0.00352963	0.00346397	0.898443	0.955524	BAHCC1	0	0	0.0254329	0
chr17	79391925	79396830	BAHCC1	0.0771826	0.0371622	0.186364	0.110018	0.395062	0.890476	0.178862	0.490678	0.791941	0.814729	0.947928	0.950646	BAHCC1	0	0	0.0254329	0
chr17	80361542	80363542	HEXDC	0.0274074	0.0208333	0.0183006	0.0630268	0.730159	0.930128	0.857143	0.88101	0.323296	0.343686	0.943988	0.958333	HEXDC	1.00667	0.343755	3.2647	0.499065
chr17	80785455	80787455	ZNF750	0.220578	0.0975	0.138889	0.187593	0.813333	0.714286	NA	0.83587	0.342182	0.448769	0.868994	0.902083	ZNF750	1.01561	0.468294	2.62471	1.11776
chr18	108156	110156	ROCK1P1	0.258188	0.257393	0.113084	0.244631	0.453333	0.471429	0.52553	0.370572	0.163008	0.175238	0.275119	0.288441	ROCK1P1	1.5899	1.57606	1.55875	1.22071
chr18	635726	637726	CLUL1	0.255208	0.0972222	0.202381	0.263455	0.75	0.666667	1	0.927928	0.797307	0.80077	0.932981	0.965517	CLUL1	0.0947837	0.110502	0.310429	0
chr18	12434606	12436638	LOC105371998	0.0409091	0.333334	0.0472222	0.0551548	NA	0.933333	0.916667	0.943889	0.349156	0.421245	0.974854	0.95045	LOC105371998	2.85876e-194	0	1.78594e-241	0.0364748
chr18	14544205	14546205	POTEC	0	NA	0	0.0297619	1	0.75	NA	0.84127	0.230903	0.327583	0.354482	0.451389	POTEC	0.0727963	0	0.10094	0
chr18	15409960	15412100	LOC644669	0.220513	0.309524	0	0.230159	0.928571	NA	0.6	0.797619	0.325907	0.340319	0.907389	0.966667	LOC644669	0	0	0	0
chr18	43199234	43201579	SLC14A2	0.101852	0.037037	0	0.0410714	0.5	NA	0.648148	0.628205	0.215354	0.143467	0.950617	0.965278	SLC14A2	0	0.0700584	0	0
chr18	54788035	54791243	BOD1L2	0.128947	0.166667	0	0.0810811	0.857143	NA	NA	0.948718	0.137917	0.151623	0.945812	0.949405	BOD1L2	0	0.0193434	0	0
chr18	54993613	54996905	ST8SIA3	0.184474	0.155543	0.151267	0.174294	0.484883	0.667128	0.465388	0.575959	0.340419	0.398407	0.792328	0.844086	ST8SIA3	0	0.00608364	0	0
chr18	55093545	55096898	ONECUT2	0.00614657	0.0109649	0.0228311	0.0100475	1	0.962319	0.548611	0.857287	0.00510186	0.00770655	0.774632	0.861081	ONECUT2	0.0458734	0.0531923	0.0322158	0
chr18	58329682	58331682	CDH20	0.0163194	0.0166667	0	0.0047619	0.845238	NA	0.916667	0.807407	0.00608568	0.027689	0.861015	0.948778	CDH20	0	0	0.104772	0
chr18	72627506	72629570	ZNF407	0.176878	0.158377	0.133773	0.171683	0.703816	0.958333	0.854321	0.840976	0.255848	0.51047	0.869048	0.913194	ZNF407	0.484775	0.342319	0.36163	0.22999
chr18	74153615	74155615	ZNF516	0.0139158	0.0159091	0.0138889	0.00866868	0.85	1	0.949495	0.92517	0.0504308	0.0607232	0.942712	0.93	ZNF516	0.0309795	0.194089	0.56345	0.0349778
chr18	74606878	74608878	ZNF236	0.146753	0.0545455	0.0486111	0.179132	1	1	0.75	0.984774	0.337952	0.32228	0.950465	0.916667	ZNF236	1.45207	1.08538	1.62676	0.941155
chr18	76754297	76756334	SALL3	0.0833333	0.0926666	0.00980391	0.0440533	0.879727	0.25	0.305555	0.664119	0.0409737	0.054947	0.777331	0.80997	SALL3	0.0390756	0.204153	0.0240085	0.0663774
chr18	77105946	77107971	NFATC1	0.370115	0.266667	0.187838	0.340623	0.966667	1	0.9	0.924722	0.73559	0.719308	0.936763	0.948485	NFATC1	0.0155806	0	0.0538822	0.0865059
chr18	77253821	77257934	NFATC1	0.309843	0.317798	0.210143	0.319321	0.865789	0.924848	0.907292	0.888169	0.67994	0.679657	0.951455	0.959467	NFATC1	0.0155806	0	0.0538822	0.0865059
chr18	77659210	77661345	KCNG2	0.0458647	0.00694445	0.0780488	0.0463762	NA	0.888889	0.629167	0.804645	0.203813	0.235466	0.892281	0.818989	KCNG2	0.0439218	0	0.107872	0
chr19	427896	434031	C2CD4C	0.338162	0.344015	0.131587	0.318789	0.854167	0.938458	0.838879	0.853362	0.233249	0.348342	0.955837	0.932007	C2CD4C	0	0.0208311	0.396167	0.0408532
chr19	615848	617986	POLRMT	0.0175198	0.00387598	0.00869565	0.0111817	0.421053	0.81994	0.0793651	0.364674	0.0632353	0.0692243	0.60246	0.669261	POLRMT	2.61658	0.912211	3.37576	1.12393
chr19	801465	807768	PTBP1	0.0654518	0.11285	0.0624561	0.0732567	0.0988701	0.835593	0.458924	0.505708	0.483519	0.517514	0.930456	0.9359	PTBP1	81.0931	20.3412	73.4577	36.8129
chr19	1079965	1081965	ARHGAP45	0.00710227	0.00460829	0	0.00717736	0.245283	0.85	0.156028	0.196279	0.00525183	0.00612699	0.446834	0.444881	ARHGAP45	2.92841	1.30369	5.52971	2.30757
chr19	1112813	1114837	GPX4	0.15451	0.127451	0.155903	0.148823	0.234146	0.385417	0.652778	0.437827	0.689213	0.771159	0.933485	0.930977	GPX4	458.739	291.54	493.767	287.661
chr19	1229563	1231563	CBARP	0.00703892	0.0025974	0.0266666	0.0101301	0.17284	0.386957	0	0.182475	0.092576	0.117508	0.341378	0.463088	CBARP	0	0.0516342	0	0
chr19	1460952	1467886	APC2	0.0397781	0.0158497	0.0804716	0.0437758	0.715136	0.58805	0.484848	0.56035	0.285066	0.28982	0.880875	0.907888	APC2	0.0104913	0.00608487	0.0128931	0
chr19	1584502	1586954	MBD3	0.0729167	0	0.009009	0.0399123	0.931818	0.980952	0.951515	0.946934	0.188844	0.205962	0.939326	0.952504	MBD3	43.6761	15.1101	10.6491	4.28481
chr19	2075773	2077849	MOB3A	0.102604	0.0921325	0.0138889	0.052048	0.909091	0.909091	0.815873	0.877662	0.13585	0.141141	0.956136	0.962095	MOB3A	0.234136	0.330532	0.20548	0.723928
chr19	2224624	2226631	PLEKHJ1	0.127015	0.127087	0.053125	0.112951	1	1	0.826471	0.782906	0.582942	0.621926	0.925624	0.941609	PLEKHJ1	84.2925	45.2049	166.648	47.0394
chr19	2543810	2545826	LOC101928602	0.154386	0	0.313768	0.19	0.666667	0.777778	0.5	0.653704	0.657873	0.662214	0.873296	0.918561	LOC101928602	0	0	0	0
chr19	3611783	3616058	CACTIN-AS1	0.0841615	0.0340426	0.0641026	0.0828349	0.538462	0.546914	0.648485	0.569523	0.294653	0.319702	0.939194	0.948372	CACTIN-AS1	8.86468e-90	1.94093e-133	0	1.35851e-36
chr19	4052240	4056621	ZBTB7A	0.0213449	0.0261905	0.0154321	0.0240071	0.618012	0.965714	0.746667	0.729975	0.154648	0.159224	0.935433	0.933333	ZBTB7A	1.83604	0.76325	2.79142	0.594146
chr19	4493324	4495324	HDGFRP2	0.0560025	0.094329	0.00675676	0.0610158	0.941176	1	0.766667	0.833413	0.0811501	0.0771605	0.958073	0.956367	HDGFRP2	5.51129	1.14992	7.15466	2.7161
chr19	4651740	4653740	TNFAIP8L1	0.0828813	0.0604521	0.069286	0.0727158	0.382812	0.954545	0.706731	0.715064	0.264522	0.262394	0.970247	0.942912	TNFAIP8L1	0.477424	0.4203	1.49326	0.361888
chr19	5220940	5222989	PTPRS	0.0970878	0.0602941	0.132812	0.0860274	0.857143	1	0.488095	0.689039	0.362826	0.382682	0.971245	0.95101	PTPRS	0.0449548	0.0521851	0.132582	0.137475
chr19	7747148	7749148	MCEMP1	0.0646766	0.0119048	0.00490196	0.0355442	0.8625	0.99	0.675926	0.845	0.0853663	0.114604	0.988815	0.94375	MCEMP1	0.0476564	0	0	0
chr19	12228932	12233366	ZNF20	0.116094	0.184593	0.113979	0.107689	0.60787	NA	0.599598	0.615017	0.422383	0.456186	0.931082	0.967143	ZNF20	1.73172	4.53282	0.542146	6.10132
chr19	12370935	12373130	ZNF44	0.155291	0.0694444	0.0625	0.0696545	0.52963	1	NA	0.529444	0.161591	0.168832	0.917838	0.934524	ZNF44	7.04062	20.5969	10.8306	16.2821
chr19	13136190	13138190	NFIX	0.140625	0.269231	0.23	0.211576	NA	1	0.85	0.916667	0.551331	0.5436	0.9875	0.967949	NFIX	0	0	0	0
chr19	13318151	13320321	IER2	0.00657895	0.01	0.0062893	0.0043573	1	0.714286	0.666667	0.800505	0.267034	0.30108	0.902134	0.959058	IER2	22.4518	15.1203	33.4166	41.6783
chr19	13941250	13943545	ZSWIM4	0.00581395	0	0	0.0143829	0.797723	0.692308	NA	0.735931	0.109272	0.14788	0.748793	0.800794	ZSWIM4	0.012637	0.0293598	0	0.00717276
chr19	16466428	16468497	KLF2	0.120964	0.0937908	0.0108333	0.0669801	0.853333	0.782099	0.65	0.727119	0.731287	0.584139	0.919886	0.978788	KLF2	0.141272	0.0234789	0	0.0230571
chr19	18776747	18783316	CRTC1	0.0541321	0.0569635	0.030618	0.052391	0.373962	0.882576	0.684524	0.717536	0.451222	0.478318	0.963022	0.950277	CRTC1	0.0929445	0.0718984	0.114189	0.118212
chr19	20217388	20219388	ZNF90	0.025641	0.0416666	0	0.0385965	0.833333	1	1	0.940909	0.27541	0.193442	0.971172	0.862037	ZNF90	8.53581	31.9076	22.6953	15.7289
chr19	27732032	27736400	LOC101927151	0.117815	0.131613	0.0889911	0.124814	0.481694	0.588478	0.581334	0.533722	0.201617	0.162722	0.587484	0.597105	LOC101927151	3.61464	1.45993	0.586643	2.08199
chr19	36050155	36052749	ATP4A	0.183014	0.0679012	0.186275	0.218355	0.470833	0.983193	0.430555	0.556117	0.756154	0.79513	0.953636	0.978788	ATP4A	0	0.0181137	0	0
chr19	36758344	36766355	ZNF565	0.0270004	0.0331071	0.00844086	0.0291792	0.881388	0.95964	0.814234	0.861098	0.0107621	0.00136089	0.864035	0.901205	ZNF565	2.36307	5.5747	0.566381	4.1956
chr19	37760117	37762117	LOC284412	0.0655297	0.106919	0.00659065	0.039533	0.186274	0.862981	0.962963	0.722097	0	0.000946969	0.818246	0.512821	LOC284412	1.06464	0.451198	0.120264	0.15435
chr19	38515657	38517927	SIPA1L3	0.2	0.2	0.0713333	0.137689	0.666667	1	1	0.942857	0.3742	0.384794	0.94855	0.979032	SIPA1L3	0.428801	0.101064	0.36228	0.119195
chr19	38876089	38878089	GGN	0.00550314	0.00757575	0.00892857	0.0161376	NA	0.787234	0.358772	0.54215	0.00188953	0.00814557	0.798785	0.798672	GGN	0.0268717	0.0313026	0	0.0154378
chr19	39805008	39807127	LRFN1	0.0223881	0.0325203	0	0.00890152	0.666667	0.9	0.83871	0.789312	0.0289916	0.0422513	0.90501	0.968161	LRFN1	1.42917	0.103869	0.702366	0.234252
chr19	40718864	40721484	CNTD2	0.012935	0.0444444	0	0.0121795	0	0.546814	0.484848	0.562729	0.15741	0.181332	0.886881	0.879048	CNTD2	0.0325218	0	0	0.0187743
chr19	43775129	43777129	PSG9	0.333334	0	0.127778	0.134162	NA	0.95	0.729487	0.837531	0.399138	0.530193	0.922903	0.929825	PSG9	0	0	0.264509	0.0316723
chr19	45864880	45867627	ERCC2	0.00911458	0.0133333	0.01875	0.0145337	0	0.797959	0.210352	0.518371	0.320478	0.328637	0.871425	0.965881	ERCC2	1.87928	0.489998	3.97207	1.07706
chr19	46215125	46217125	FBXO46	0.0423413	0.0555555	0.00666666	0.0278592	0.666667	0.76383	0	0.761042	0.216212	0.244467	0.947561	0.954645	FBXO46	1.9297	0.608963	1.57868	1.33647
chr19	46502673	46504673	CCDC61	0.0491039	0.0574712	0.0166667	0.03875	0.846154	0.944445	0.963636	0.909314	0.0365537	0.0472556	0.871701	0.932164	CCDC61	1.71723	0.831247	3.58171	0.374047
chr19	49000865	49002871	LMTK3	0.00460829	0	0	0.00677083	NA	1	0.429885	0.59198	0.00875604	0.0149763	0.73774	0.781711	LMTK3	0.0438228	0	0.107698	0
chr19	50058663	50062162	NOSIP	0.0163975	0.0555556	0.0146199	0.0166404	0.179167	0.931034	0.704762	0.684757	0.207075	0.20755	0.606072	0.704864	NOSIP	84.4836	64.8537	81.3093	72.6342
chr19	50099457	50101469	PRR12	0.0056338	0.0104167	0.0327381	0.0236727	1	0.965714	NA	0.928985	0.1301	0.123255	0.906044	0.97381	PRR12	0.115991	0	0.266072	0.0305972
chr19	54039301	54044023	ZNF331	0.00848765	0.00725806	0.0340136	0.0303943	1	0.916667	0.481481	0.88766	0.0898748	0.101115	0.919096	0.916667	ZNF331	4.71441	3.95336	5.23159	3.04194
chr19	54058110	54060704	ZNF331	0.020202	0.0175438	0.00555556	0.016179	0.8	1	0.916667	0.903236	0.141731	0.143518	0.8383	0.967029	ZNF331	4.71441	3.95336	5.23159	3.04194
chr19	55606415	55610419	EPS8L1	0.303181	0.135185	0.0125	0.196713	0.747761	0.778947	0.806373	0.726919	0.334155	0.630186	0.935091	0.976667	EPS8L1	0.10489	0.244343	0	0.135509
chr19	55673544	55676611	TNNI3	0.0528129	0.0567568	0.0575758	0.0579948	0.813333	0.409864	0.78125	0.455339	0.292903	0.369282	0.864457	0.954167	TNNI3	0	5.38763	1.02048	0.250956
chr19	56103706	56105730	FIZ1	0.00784672	0.0125786	0.0229167	0.0107936	NA	0.933333	0.29881	0.80696	0.018109	0.0187415	0.793235	0.765784	FIZ1	0.788553	0.0247995	0.890223	0.523999
chr19	56615116	56619286	ZNF787	0.33224	0.3805	0.253186	0.276278	0.75	0.785498	0.762644	0.750187	0.33093	0.384973	0.920777	0.923923	ZNF787	1.84332	0.335639	1.20289	0.281758
chr19	56657733	56660805	ZNF444	0.123369	0.140437	0.0625	0.0981166	NA	0.869048	0.615942	0.778842	0.331914	0.352694	0.950747	0.973287	ZNF444	4.56768	2.39884	8.04147	6.17859
chr19	57829053	57831053	ZNF543	0	0	0	0	0	NA	0.6	0.638095	0.0596405	0.0854382	0.761111	0.801587	ZNF543	0.566924	0.747736	1.55631	1.28927
chr2	1286902	1288902	TPO	0.0222222	0.0416666	0.0392157	0.0205074	0.769231	1	NA	0.867949	0.106708	0.145215	0.910141	0.879472	TPO	0	0	0	0.012843
chr2	2828529	2830935	MYT1L	0.0415584	0.0970238	0.0651042	0.0616603	0.481481	0.958333	0.766667	0.804601	0.280726	0.284324	0.992525	0.949057	MYT1L	0	0.338723	0.018394	0.00845912
chr2	4195193	4197269	DCDC2C	0.289619	0.241387	0.206344	0.238056	0.480131	0.428571	0.492121	0.478276	0.127946	0.11373	0.904938	0.888889	DCDC2C	0	0	0	0
chr2	6378302	6380334	LOC400940	0.123142	0.0259259	0.11828	0.120828	0.308642	0	0.644013	0.413306	0.317336	0.0854753	0.598176	0.497619	LOC400940	0	0	0	0
chr2	11777892	11782350	NTSR2	0.0857488	0.0813008	0.0677083	0.084127	0.956522	1	0.774948	0.801536	0.563186	0.605929	0.901943	0.943243	NTSR2	0	0.0873104	0	0
chr2	11988964	11991828	LPIN1	0.00892857	0.177778	0.0466666	0.0443662	0.454545	0.833333	0	0.464935	0.259705	0.2586	0.675191	0.754012	LPIN1	5.34924	6.02001	16.3364	7.01298
chr2	33953012	33955050	FAM98A	0	0	0	0.0347222	1	NA	0.777778	0.933333	0.285456	0.353203	0.97594	0.926344	FAM98A	18.2925	13.8136	13.8726	16.5544
chr2	41924904	41926918	LOC388942	0.0166667	0	NA	0.0111111	1	NA	0.583333	0.833333	0.0134725	0.0166046	0.964021	0.885058	LOC388942	0	0	0	0
chr2	43658865	43660872	THADA	0.173431	0.321675	0.18918	0.240603	0.701286	NA	0.478503	0.601055	0.461688	0.498511	0.903846	0.875	THADA	2.06607	3.03408	1.5943	5.20435
chr2	45227562	45230167	SIX2	0.0564626	0.122807	0	0.0365826	0.79145	NA	0.935065	0.840314	0.0399649	0.0409642	0.776135	0.853409	SIX2	0.080615	0.187816	2.50872	3.75138
chr2	45537584	45539584	SRBD1	0.369444	0.625	0.208623	0.255228	0.533333	0.8	NA	0.716667	0.554548	0.746015	0.984034	0.9	SRBD1	3.17562	8.67833	6.25774	13.3963
chr2	46324484	46326484	EPAS1	0.25	0.428571	0	0.118367	0.8	NA	NA	0.866667	0.77449	0.756326	0.9	1	EPAS1	0.505271	0.293356	1.11241	0.441352
chr2	48181039	48183039	FBXO11	0	0	0.222222	0.0658436	NA	1	0.825	0.86	0.526536	0.498004	0.774286	1	FBXO11	15.624	14.6015	18.5623	10.9055
chr2	54199217	54201274	ACYP2	0.157109	0.183925	0.134782	0.145268	0.481162	1	0.338945	0.571148	0.3322	0.387128	0.762597	0.90625	ACYP2	1.21873	3.54869	0.381022	1.32843
chr2	62733041	62735407	TMEM17	0.00724637	0.0740741	1	0.0445205	0.988889	NA	1	0.948582	0.166392	0.217486	0.938817	0.921919	TMEM17	1.79765	2.02451	0.374254	0
chr2	73519228	73521643	EGR4	0.0109705	0.00837418	0	0.00450257	0.978723	1	NA	0.933356	0.00420608	0.000897436	0.885091	0.898676	EGR4	0	0	0	0.0138394
chr2	77357707	77359724	LOC101927907	0.262182	0.289979	0.278418	0.179068	0.528704	1	0.521833	0.506315	0.0840791	0.120645	0.761905	0.933333	LOC101927907	0	0	0	0
chr2	85811789	85815916	VAMP5	0.102914	0.0419173	0.126984	0.0805941	0.634524	0.611111	0.542	0.584247	0.614779	0.592275	0.849538	0.912879	VAMP5	9.48229	10.5554	7.94093	4.09484
chr2	90417895	90422095	ANKRD36BP2	0.312987	0.402667	0.0949633	0.261045	0.896104	0.666667	0.894444	0.760076	0.303139	0.338436	0.593649	0.69019	ANKRD36BP2	0.309496	0.227334	0.168947	0.0795351
chr2	92291417	92293417	GGT8P	0.208397	0.108196	0.11796	0.163587	0.666667	0.838543	0.733058	0.847414	0.2932	0.242862	0.653818	0.779896	GGT8P	0	0	0	0
chr2	97505746	97507898	ANKRD23	0.0849099	0.211111	0.25	0.160636	1	1	0.745614	0.728571	0.643372	0.662968	0.920519	0.94209	ANKRD23	0.0440286	0.02562	0	0.0251899
chr2	99248348	99250364	UNC50	0.527778	0.0666667	0	0.417424	1	0.888889	NA	0.931818	0.51283	0.590301	0.927232	0.975758	UNC50	64.7794	110.75	40.6271	102.468
chr2	137814248	137816280	THSD7B	0	NA	NA	0.0321429	1	0.333333	1	0.878788	0.179075	0.233766	0.949726	0.967857	THSD7B	0	0	0	0.0200807
chr2	199489715	199491715	LOC101927619	0	NA	0	0	NA	1	1	1	0.356972	0.398504	0.988889	0.901042	LOC101927619	0	0	0.0493222	0
chr2	204127569	204129569	CYP20A1	0.452381	0.333334	0.0555555	0.298125	1	1	NA	0.952381	0.345813	0.504872	0.973011	0.991304	CYP20A1	2.12798	3.94844	2.04198	3.65195
chr2	215372802	215374846	VWC2L-IT1	0.076923	0	NA	0.0921052	NA	0.5	1	0.795454	0.292659	0.383937	0.87909	0.984615	VWC2L-IT1	0	0	0	0
chr2	216065424	216067480	ABCA12	0.286906	0.163175	0.195702	0.274654	0.420773	0.430665	0.331257	0.566052	0.56539	0.629843	0.712121	0.921053	ABCA12	0	0	0	0
chr2	220404570	220407127	CHPF	0.0975903	0.137085	0.188333	0.122415	0.141414	0.755556	0.674324	0.457213	0.52187	0.5122	0.850326	0.926918	CHPF	1.07	0.633142	2.02955	1.86359
chr2	220616345	220618393	SLC4A3	0	0	0	0.0196078	0.8	0.875	NA	0.833333	0.125978	0.118906	0.920635	0.912698	SLC4A3	0.0129836	0	0	0
chr2	224867877	224869877	SERPINE2	0	0	0.05	0.0118227	1	1	0.944445	0.895833	0.765917	0.774259	0.92523	0.954545	SERPINE2	0.845937	2.74462	2.40306	2.6881
chr2	227661836	227665232	IRS1	0.0293103	0.0407051	0.00938966	0.0161193	0.135593	0.795792	0.0204082	0.259151	0.00689383	0.0146633	0.323646	0.285425	IRS1	0.232432	0.00709644	0.0751682	0.11049
chr2	234070428	234072428	ATG16L1	0.129167	0.133333	0.0912697	0.148095	0.9	1	0.333333	0.851504	0.801854	0.827997	0.928499	0.949495	ATG16L1	10.569	12.2933	12.1309	22.5535
chr2	241717440	241721614	KIF1A	0.219346	0.178802	0.439189	0.273974	0.872449	0.923387	0.62284	0.846336	0.5155	0.576888	0.812396	0.902036	KIF1A	0	0.021294	0	0.0172688
chr20	3731971	3734214	C20orf27	0.0128205	0.0151515	0.00416667	0.0115414	0.0491803	0.152809	0.846405	0.220962	0.0201972	0.0233341	0.450514	0.535821	C20orf27	148.838	59.1838	66.8745	63.7984
chr20	4201580	4203597	ADRA1D	0.0045045	0	0	0.010929	0.983333	0.958333	NA	0.905747	0.0153624	0.0330087	0.625675	0.691486	ADRA1D	0	0	0	0
chr20	18207475	18209475	ZNF133	0.0104167	0.047619	0	0.0162907	NA	0.755952	0.666667	0.648837	0.0911382	0.0243118	0.488983	0.649702	ZNF133	1.05094	2.29978	2.53448	2.24698
chr20	33466865	33468869	ACSS2	0	0	0.272727	0.129911	NA	1	0.333333	0.792593	0.511833	0.538506	0.800926	1	ACSS2	7.20192	1.22794	6.26472	15.3067
chr20	35169777	35172076	MYL9	0.0265625	0.078125	0	0.0228784	0.78125	0.75	0.576923	0.713085	0.3252	0.327684	0.904224	0.926284	MYL9	3.35906	0.0621026	0.623652	0.150652
chr20	44509853	44511853	ZSWIM1	0.0166667	0.025	0.075	0.0469697	0.4	1	0	0.59	0.446454	0.503386	0.930745	0.970899	ZSWIM1	1.09405	0.96639	0.647167	0.775466
chr20	45279094	45283318	SLC13A3	0.0944444	0.0357143	0.00925925	0.0202532	0.678571	0.928571	0.902174	0.903147	0.183606	0.277267	0.871565	0.989177	SLC13A3	0.367101	0	0	0.0241216
chr20	50769116	50771197	ZFP64	0.0341463	0.0244444	0.0333333	0.0531328	1	0.888889	0.933333	0.895238	0.109372	0.12319	0.950376	0.980296	ZFP64	13.8842	9.25981	12.2705	8.7826
chr20	52789954	52792167	CYP24A1	0.016369	0.03125	0	0.0144737	0.991667	1	0.866667	0.900295	0.003367	0.00308808	0.766869	0.823632	CYP24A1	0	0.0212381	0	0
chr20	57429208	57431638	GNAS	0.00287357	0	0	0.00605793	0.943089	0.925	1	0.957358	0.00380551	0.00320067	0.917578	0.950216	GNAS	180.792	49.8465	207.006	151.894
chr20	60540094	60542094	TAF4	0.02	0	0.104475	0.0350708	0.8	0.962963	0.846154	0.912271	0.27886	0.37679	0.945879	0.889323	TAF4	2.77525	1.26192	2.40887	1.08515
chr20	62383341	62386106	SLC2A4RG	0.0353018	0.0154762	0.0095238	0.0282516	0.714286	0.899225	0	0.736119	0.279629	0.307534	0.950192	0.951254	SLC2A4RG	0.48025	0.0587965	0.248096	0.302084
chr20	62568115	62570195	UCKL1	0.0541666	0.111111	0.0351541	0.0736001	0.785714	0.833333	0.652636	0.722668	0.323569	0.368759	0.874676	0.865847	UCKL1	13.3364	9.95786	20.7771	10.8039
chr21	10203127	10205127	TEKT4P2	0.0591097	0.0343137	0.0153846	0.0422556	0.4	0.666667	0.333333	0.6875	0.123502	0.179167	0.933525	0.939815	TEKT4P2	54.2741	59.0762	52.7293	44.7343
chr21	11138133	11140133	BAGE	0.202199	0.19881	0.0785009	0.142788	0.588889	0.488604	0.539352	0.550709	0.184941	0.264873	0.530533	0.469014	BAGE	4.46774e-09	3.86954	0	0
chr21	15435653	15437653	ANKRD20A11P	0.0415658	0.0296375	0.0173913	0.0240672	0.895161	1	NA	0.926136	0.011781	0.00437853	0.807146	0.868996	ANKRD20A11P	0.0595874	0	0	0.0704335
chr21	33319116	33321116	HUNK	0.0263158	0	0	0.0196581	0.653846	0.867857	1	0.788996	0.0916713	0.095701	0.977236	0.982143	HUNK	0.341645	0.430202	0.893281	0.583238
chr21	40754946	40759886	WRB	0.0967592	0.0503268	0.0225438	0.0702838	0.863691	0.793333	0.6275	0.724294	0.227856	0.224443	0.610807	0.787857	WRB	54.0356	65.4787	9.11977	10.8256
chr21	46126183	46128183	TSPEAR	0.0481489	0.0253247	0	0.0182331	0.82585	0.81	0.611111	0.726217	0.0190576	0.00735168	0.940161	0.845783	TSPEAR	0	0	0	0
chr21	46521200	46523203	ADARB1	0.229167	0.225824	0.0178571	0.0900285	0.333333	0.818182	0.638889	0.702564	0.355224	0.390631	0.99812	0.971774	ADARB1	0.831998	0.900117	0.92602	0.980573
chr22	18008065	18012937	SLC25A18	0.18869	0.132759	0.111111	0.190746	0.939286	0.666667	0.626667	0.818789	0.449833	0.542132	0.90792	0.977546	SLC25A18	0.111922	0.489045	0.893683	2.0744
chr22	23602868	23606116	BCR	0.0380357	0.0585784	0.0436508	0.0521915	0.886905	0.930556	0.893678	0.880513	0.560786	0.338404	0.963001	0.931065	BCR	2.02328	1.25263	3.69665	1.69424
chr22	25507357	25510521	LOC100128531	0.0530612	0.0292793	0	0.0297466	0.792328	0.942708	0.825	0.848502	0.162302	0.193781	0.949593	0.985049	LOC100128531	0	0	0	0
chr22	28930377	28933964	TTC28	0.295498	0.227098	0.173238	0.298466	0.549694	NA	0.51233	0.582214	0.333795	0.379728	0.713889	1	TTC28	1.15662	0.271456	0.597398	0.26619
chr22	37467875	37470152	KCTD17	0.442694	0.512897	0.322262	0.433636	0.955556	0.966667	0.762821	0.872833	0.839319	0.848265	0.969386	0.968889	KCTD17	0	0.425155	0	0.0235054
chr22	42524131	42527048	LOC101929829	0.0112782	0.0312501	0.0121622	0.0420549	0.314815	0.781592	0.662366	0.590085	0.103621	0.121596	0.695598	0.684389	LOC101929829	1.46166e-05	0	3.99339e-05	7.85408e-06
chr22	42949245	42951245	SERHL2	0.0078125	0	0	0.00478036	0.402381	0.519048	0	0.384749	0.0102354	0.00469877	0.894968	0.917337	SERHL2	0.895217	1.90289	0.610038	1.38042
chr22	45013056	45016947	PRR5	0.164748	0.12096	0.0536036	0.124346	0.538095	1	0.650794	0.627569	0.296149	0.28562	0.930232	0.853442	PRR5	60.4877	22.5191	107.085	47.0535
chr22	46610530	46612556	CDPF1	0.0645161	0.0694445	0.034	0.0557471	0.808824	0.901667	0.916667	0.833639	0.225499	0.239868	0.982702	0.954511	CDPF1	5.46637	4.00261	9.71896	5.31282
chr22	46815688	46817688	TRMU	0.0460145	0.0833332	0.25625	0.103795	0.77381	1	0.666667	0.777564	0.599881	0.659306	0.940995	0.957364	TRMU	38.9715	26.4122	45.7575	33.5872
chr22	50065622	50067746	C22orf34	0.0345528	0.0416667	0.0166667	0.0269385	NA	0.933069	0.319444	0.726561	0.15267	0.172554	0.926825	0.907018	C22orf34	0.0346398	0.157029	0.508126	0.873629
chr22	50775932	50777932	PPP6R2	0.548913	0.507895	0.111111	0.493425	0.8	1	0.851515	0.896742	0.387115	0.3875	1	1	PPP6R2	1.88868	0.842924	3.9363	1.8906
chr3	1144305	1146329	CNTN6	0.0528846	0.105273	0.0810606	0.111718	0.444444	0.875	0.551948	0.801465	0.0596939	0.169591	0.958742	0.904762	CNTN6	0.270324	2.31267	3.87508	10.9075
chr3	25615982	25618121	TOP2B	0.117521	0.218391	0.09375	0.117218	1	1	NA	0.975	0.403544	0.401629	0.953477	0.968651	TOP2B	8.59806	9.03327	17.5882	10.9203
chr3	32565399	32567533	CMTM6	0.175	0.326667	0	0.0733333	1	1	0.925926	0.972222	0.518468	0.479209	0.978571	0.934028	CMTM6	42.1725	45.1822	25.0951	27.5966
chr3	49946273	49948273	MST1R	0.0681372	0.0386905	0.112222	0.0712834	0.785714	1	0.785714	0.810256	0.253761	0.244275	0.930588	0.929301	MST1R	0	0	0.0902788	0
chr3	52999879	53001879	TMEM110-MUSTN1	0.210169	0.168424	0.161714	0.186632	0.514175	0.763889	0.462771	0.571681	0.0473856	0.129274	0.740764	0.965517	TMEM110-MUSTN1	3.43595	2.8835	5.49911	7.38473
chr3	53856622	53859802	CHDH	0.0268665	0.0136612	0.0215054	0.0244938	0.97619	0.888889	0.851064	0.835865	0.148151	0.146161	0.81162	0.805128	CHDH	0.432909	0.31228	0.440205	0.882906
chr3	54660190	54662342	ESRG	0.162281	0.666667	0.0210526	0.0983135	0.833333	0.972222	1	0.94391	0.295779	0.313053	0.891281	0.923164	ESRG	8.66586	9.63472	12.7554	16.6621
chr3	61717621	61720120	PTPRG	0.0288462	0.0446428	0.124282	0.0696207	0.4	1	0.640909	0.562745	0.478908	0.38688	0.843156	0.858333	PTPRG	0.243052	0.921508	0.517708	0.729061
chr3	69677333	69679341	MITF	0.181818	0.222222	NA	0.180702	0.767857	0.944444	NA	0.733321	0.0563568	0.088899	0.513227	0.74359	MITF	2.15285	1.17153	1.3526	2.17485
chr3	86297493	86299493	LOC101927494	0.092874	0.0845694	0.225595	0.157456	0.363964	NA	0.390954	0.371925	0.104509	0.212719	0.234783	0.371429	LOC101927494	0	0	0	0
chr3	106362638	106364759	DUBR	0.117647	0.0740741	0.142857	0.105449	1	NA	0.954545	0.903584	0.0532272	0.0665643	0.842677	0.873171	DUBR	0	0.0198913	0	0.00974739
chr3	108483800	108485843	TRAT1	0	0	NA	0.123333	0.8	NA	0.633333	0.602381	0.307005	0.432907	0.828608	0.651515	TRAT1	0	0	0	0
chr3	125643772	125645805	FAM86JP	0.0856667	0.109375	0.0625	0.127337	0.846429	0.904762	0.9	0.85325	0.400755	0.57773	0.86627	0.84	FAM86JP	0.693482	0.802789	1.88383	0.259122
chr3	128720930	128722941	EFCC1	0.00123762	0	0.0166667	0.00391007	NA	0.792208	0.402056	0.554067	0.0074541	0.00319147	0.301846	0.322545	EFCC1	0	0	0.155133	0.0120308
chr3	129820734	129822734	FAM86HP	0.136555	0.0380952	0.293333	0.179495	NA	0.733333	0.714286	0.716553	0.71149	0.729203	0.892857	0.963415	FAM86HP	0.519393	0.0798287	0.0673373	0.140993
chr3	133264725	133266725	CDV3	0.0568181	0	0	0.0242424	0.633333	1	0.958333	0.835813	0.315958	0.297636	0.917732	0.888889	CDV3	131.108	93.1296	81.4995	80.2211
chr3	141761831	141763831	TFDP2	0.0725071	0.046627	0.00357143	0.0331945	0.72	NA	0.828125	0.819599	0.264333	0.142885	0.816068	0.938725	TFDP2	6.7584	7.36048	8.87292	7.72845
chr3	165116730	165118730	SLITRK3	0.117623	0.0866667	0.159841	0.107574	NA	NA	0.571212	0.561706	0.064	0.186466	0.444444	0.738095	SLITRK3	0	0	0	0
chr3	169780489	169782512	GPR160	0.037037	0	0	0.0181159	0.925926	NA	NA	0.95119	0.00997387	0.00742424	0.883994	0.940657	GPR160	19.7051	126.284	35.0971	68.0263
chr3	176162344	176164388	NAALADL2-AS1	0.111325	0.100694	0.215278	0.107829	0.811429	NA	0.327381	0.655983	0.0783515	0.0883117	0.318182	0.388889	NAALADL2-AS1	0	0	0	0
chr3	178096868	178098891	KCNMB2	0	0	0.666667	0.0289855	0.683333	1	NA	0.740625	0.219491	0.229088	0.596491	0.901961	KCNMB2	0.044587	0	0.054767	0.0255156
chr3	182817008	182819032	MCCC1	0.0108025	0	0.0476191	0.0170683	1	1	0.949275	0.959864	0.0185185	0.00264085	0.954857	0.933962	MCCC1	7.71348	1.14898	0.370883	0.236138
chr3	197455872	197457872	RUBCN	0.347619	0.320833	0	0.189785	0	1	NA	0.571429	0.634373	0.535447	0.758029	0.747312	RUBCN	0.69385	0.592394	1.21527	0.640284
chr4	67802	69845	ZNF718	0.25502	0.251729	0.283296	0.269314	0.785714	0.666667	0.761806	0.783697	0.555935	0.659374	0.906514	0.888702	ZNF718	4.27532	6.2842	1.52388	4.82604
chr4	564077	567997	PDE6B	0.162182	0.230348	0.0665368	0.149397	1	0.688889	0.571429	0.807347	0.591221	0.57754	0.737906	0.761052	PDE6B	0.345093	0.283398	0.0498773	0.0231937
chr4	740848	742873	PCGF3	0.196296	0.211333	0.230952	0.205944	0.4	0.8	0.83913	0.741153	0.20808	0.264698	0.886008	0.929697	PCGF3	6.16791	1.85173	5.35717	2.76857
chr4	958701	962234	DGKQ	0.0732033	0.0132353	0.0782313	0.0852331	0.414062	0.420964	0.484375	0.45017	0.560533	0.555099	0.942343	0.94	DGKQ	0.0706174	0.0136699	0.347092	0.25367
chr4	4075957	4077957	FAM86EP	0.0858974	0.268518	0	0.0512531	1	1	NA	1	0.231896	0.378064	0.810108	0.815476	FAM86EP	0.742	0.588379	1.51925	0.608515
chr4	4864181	4866321	MSX1	0.0190769	0.026087	0.005291	0.0119048	0	0.343074	1	0.437728	0.00409445	0.00573258	0.706978	0.714251	MSX1	0.332821	0.246882	3.04752	0.923934
chr4	6703004	6705135	S100P	0.0725427	0.0277778	0	0.0476311	1	0.833333	0.5	0.799603	0.305089	0.370699	0.90535	0.82	S100P	54.6347	4.86174	63.4199	40.7801
chr4	7418192	7420192	PSAPL1	0.204546	0	0.0666666	0.168468	0.958333	0.866667	1	0.904762	0.766904	0.816423	0.954832	0.932073	PSAPL1	0	0.0271128	0.0860541	0
chr4	9846707	9848872	SLC2A9	0.164495	0.158836	0.117864	0.144633	0.434286	0.75	0.374306	0.422662	0.225207	0.282353	0.521529	0.522257	SLC2A9	0	0.0739283	0.0777004	0.146411
chr4	19240471	19242471	SLIT2	0	NA	0	0	NA	0.666667	NA	0.683673	0.143048	0.16334	0.394328	0.857143	SLIT2	0.0133197	0.00772745	0.0163685	0.00376116
chr4	46378835	46380895	GABRA2	0.032197	0.0611112	0.126667	0.0548564	0.47619	0.547222	NA	0.540975	0.0909418	0.174005	0.589278	0.695402	GABRA2	0	0.606608	0	0
chr4	49215145	49217145	CWH43	0.0990476	0.0692308	0.108333	0.108914	0.85	0.761905	0.875	0.835492	0.248072	0.31735	0.779622	0.621085	CWH43	0	0	0	0
chr4	68264335	68266335	LOC101927237	0.379913	0.360689	0.254243	0.360247	0.645833	0.722549	0.74836	0.687327	0.486047	0.478479	0.701722	0.758496	LOC101927237	0.0299092	0	0	0.0172275
chr4	83981406	83983423	COPS4	0.125309	0.101852	0.0451203	0.0546524	0.662222	1	0.78	0.678038	0.130869	0.138355	0.892196	0.921429	COPS4	54.1039	115.958	59.5651	120.167
chr4	89618531	89620850	FAM13A-AS1	0.003663	0.05	0	0.00734463	0.8	NA	0.965686	0.957955	0.0124269	0.00497179	0.870295	0.956522	FAM13A-AS1	0.249949	0	0.0427553	0.0767663
chr4	93670169	93672169	GRID2	0.0178571	0	0.1	0.0444444	0.916667	0.9	NA	0.878472	0.0966477	0.113366	0.960811	0.991071	GRID2	0	0.0354291	0.026464	0.012206
chr4	106080978	106083021	TET2	0	0	0	0	0.622222	0.825	1	0.722222	0.112168	0.119954	0.888183	0.936667	TET2	12.4903	23.6972	17.1492	8.99039
chr4	122853690	122856098	TRPC3	0	NA	0	0	0.963636	1	0.941176	0.966903	0.133211	0.133002	0.974453	0.943966	TRPC3	0	0	0	0
chr4	129115377	129117377	PGRMC2	0.0217391	0	0.0833334	0.04375	1	NA	0.979167	0.881818	0.264423	0.335537	0.787054	0.974603	PGRMC2	6.98248	2.74431	3.00907	3.66312
chr4	132652949	132660505	LOC101927305	0.0334717	0.0394503	0.0226044	0.0253422	0.830769	0.0394483	0.0130719	0.330522	0.0194149	0.0442983	0.275579	0.273985	LOC101927305	6.7219	0.961763	0	1.15224
chr4	154169234	154171428	TRIM2	0.0937909	0.376812	0.0190476	0.0929335	0.205128	0.909167	NA	0.627864	0.0439099	0.0652496	0.864203	0.906011	TRIM2	5.09275	5.46349	10.4073	5.08952
chr4	154710500	154712569	SFRP2	0	0	0.0316666	0.024537	0.95	0.991667	0.872807	0.93096	0.00794178	0.00474482	0.899276	0.956306	SFRP2	0	0	0.0721125	0.050698
chr4	162924092	162926092	LOC101928052	0.0777778	0.111111	0.214286	0.116597	0.666667	1	1	0.898718	0.428125	0.711962	0.934615	1	LOC101928052	0	0	0	0
chr4	183728695	183731462	DCTD	0.0511006	0.115	0.0348432	0.0674692	0.571429	0.940741	NA	0.787554	0.0889396	0.0858895	0.941609	0.912746	DCTD	38.1762	31.2486	16.2485	12.6501
chr4	187353600	187357793	F11-AS1	0.546732	0.733333	0.222222	0.548345	0.831642	0.83145	0.815334	0.848287	0.684949	0.637734	0.812212	0.776667	F11-AS1	0.791321	0.0922667	0	0
chr4	190228689	190230732	LOC105379514	0.0315509	0.0390955	0.024248	0.0327224	0.871795	0.869593	0.655087	0.73126	0.00688027	0.0114572	0.697514	0.744491	LOC105379514	0	0	0	0
chr5	258814	263092	PDCD6	0.0230591	0.0502927	0.0550013	0.0387049	0.850127	0.973849	0.869613	0.858363	0.0144407	0.0192299	0.781606	0.725038	PDCD6	454.065	342.495	373.574	384.781
chr5	1570053	1572266	SDHAP3	0.20662	0.24915	0.0142276	0.144415	0.936937	0.945161	0.775253	0.875668	0.240362	0.315591	0.884627	0.898438	SDHAP3	4.91921	4.44846	0.682416	3.50818
chr5	3287645	3289646	IRX1	0.368628	0.361905	NA	0.313444	1	0.866667	1	0.887037	0.675086	0.687245	0.914922	0.970238	IRX1	0	0	0	0
chr5	10648970	10651519	ANKRD33B	0	0	0.0111111	0.00820106	0.84058	0.925532	0.888889	0.880139	0.042609	0.0530487	0.94467	0.953216	ANKRD33B	1.8349	0.344829	3.02064	1.44833
chr5	15936669	15938669	2021-03-11	0.0333333	0.0952381	0	0.0207407	0.811724	0.968421	NA	0.889689	0.0470539	0.0620772	0.955408	0.978535	44266	0	0.185337	0	0.0921831
chr5	17140585	17144491	BASP1	0.109057	0.182456	0.0555556	0.098404	0.95	1	1	0.926984	0.434305	0.584599	0.875121	0.789236	BASP1	565.487	183.458	177.782	321.986
chr5	36243010	36245010	NADK2	0.030303	0	0	0.0125	NA	0.5	1	0.72	0.134993	0.174073	0.487013	0.405556	NADK2	1.43959	2.32882	1.01635	2.24667
chr5	49405777	49416888	EMB	0.28678	0.239478	0.196929	0.26436	0.718333	0.840382	0.823939	0.820743	0.471878	0.501556	0.775591	0.789166	EMB	0.0381887	0.243997	0.093849	0.169808
chr5	53178955	53182441	NDUFS4	0.0416666	0.0277778	0	0.0160714	NA	0.9	NA	0.9	0.3745	0.462451	0.75787	0.921296	NDUFS4	302.08	234.426	248.789	215.499
chr5	58883363	58885363	PDE4D	0.0833334	0	0.333333	0.109524	1	1	NA	1	0.279018	0.252083	0.79329	0.897222	PDE4D	0.229743	0.17777	0.173965	0.184096
chr5	64153736	64155736	CWC27	0.186645	0.168627	0.184819	0.188135	0.430408	0.511407	0.384377	0.423538	0.0577201	0.138605	0.486667	0.6	CWC27	23.6528	45.0962	21.5371	23.3751
chr5	67542243	67544364	PIK3R1	0.225397	0.5	0	0.142276	1	0.904762	0	0.699537	0.255131	0.306627	1	0.910714	PIK3R1	0.166256	2.03377	0.52924	0.126382
chr5	92929270	92932634	NR2F1	0.0674243	0.029885	0	0.0446649	0.330357	0.641026	0	0.40254	0.227696	0.226788	0.601301	0.641804	NR2F1	0.0445286	0.0862489	0.255324	0.0844052
chr5	117414357	117416628	LOC102467224	0.1	0.119048	0	0.0416667	1	1	NA	1	0.218511	0.246453	0.928431	0.934211	LOC102467224	0	0	0	0
chr5	134364557	134366658	C5orf66	0.0246914	0.0333333	0.0646259	0.0534141	0.933333	NA	0.833333	0.818011	0.019974	0.0320562	0.94306	0.94697	C5orf66	0	0.0270041	0.569518	0.23431
chr5	135081704	135083765	SLC25A48	0	0	0.0277778	0.00769231	NA	1	1	0.981482	0.38061	0.257331	0.950575	0.928205	SLC25A48	0	0	0.129976	0.404314
chr5	135186990	135189678	SLC25A48	0.0937985	0.0888889	0.0672043	0.0928526	0.893939	1	0.958333	0.942064	0.309944	0.318365	0.954317	0.931548	SLC25A48	0	0	0.129976	0.404314
chr5	137450487	137452613	NME5	0.0733333	0	0	0.0541666	NA	1	NA	0.857778	0.310023	0.266234	0.936364	0.941176	NME5	0.772782	1.44731	0.379533	0.755846
chr5	168175202	168177399	LOC101927969	0.118639	0.131041	0.0416666	0.108101	0.25	1	0.95	0.844737	0.538566	0.539922	0.956136	0.983333	LOC101927969	0	0	0	0
chr5	173739106	173741117	HMP19	0.0338095	0.1	0.0961538	0.0675758	0.333333	0.914286	NA	0.655556	0.231736	0.267554	0.798137	0.952381	HMP19	0	0.108461	0	0
chr5	176917390	176921582	PDLIM7	0.0723758	0.0444444	0.068254	0.0534967	0.580247	0.562091	0.166667	0.423909	0.358919	0.388418	0.877018	0.952116	PDLIM7	11.2043	5.3133	21.5546	11.2563
chr5	178592543	178594543	ZNF354C	0.045977	0	0	0.0201923	0.890909	0.5	0.6	0.747355	0.191354	0.197183	0.774317	0.952381	ZNF354C	3.59718	0.343522	0.340901	2.3552
chr5	179331765	179333765	TBC1D9B	0.0833333	0	0.0618279	0.0587557	0.642105	0.9375	0.608333	0.715929	0.402898	0.466891	0.907536	0.959259	TBC1D9B	3.39358	1.47619	2.14382	2.54987
chr5	179619814	179621814	RASGEF1C	0.134173	0.196587	0.0586549	0.0736393	0.425961	NA	0.373204	0.496322	0.119807	0.24002	0.90763	0.961765	RASGEF1C	0.208315	0	0.12795	0.074745
chr6	6286202	6288202	F13A1	0.14	0.148148	0	0.062037	1	1	NA	1	0.567017	0.550975	0.938889	0.947059	F13A1	0	0	0	0
chr6	7229793	7232361	SSR1	0.044026	0.0377451	0	0.0345641	0.909774	0.99435	1	0.932265	0.0624391	0.0911034	0.960169	0.963367	SSR1	14.8768	19.9349	6.05619	15.2385
chr6	18366932	18369029	RNF144B	0.355556	0.386111	0.153581	0.250852	1	1	0.944444	0.972	0.679897	0.668446	0.957397	0.899074	RNF144B	0.108103	0.138087	0	0
chr6	24126469	24128469	NRSN1	0	0	0	0	NA	NA	0.333333	0.625758	0.181815	0.112075	0.840909	0.765972	NRSN1	0	0	0	0
chr6	43019667	43021667	CUL7	0.0131195	0.0625	0.0526315	0.0502717	0.451754	0.964912	0.0204081	0.689567	0.275394	0.287676	0.840269	0.793627	CUL7	0.256282	0	0.121098	0
chr6	58775452	58781598	GUSBP4	0.24614	0.224709	0.153663	0.213757	0.645202	0.758073	0.769099	0.71457	0.356928	0.355689	0.708887	0.720936	GUSBP4	0.869468	0.142108	0.374425	0.509038
chr6	75508729	75510729	COL12A1	0.322503	0.183542	0.24998	0.291919	0.590683	NA	0.621321	0.657328	0.343872	0.575843	0.703977	1	COL12A1	0.0662086	0.00768207	0.0338195	0
chr6	78739583	78741601	MEI4	0	0	0	0.00609756	0.6875	0.666667	NA	0.678261	0.161236	0.0650789	0.933096	0.953125	MEI4	0.222148	0.025797	0.0272943	0.371491
chr6	89657137	89659165	RNGTT	0.362959	0.26024	0.220844	0.222191	0.504968	NA	0.500224	0.59343	0.743056	0.484615	0.85	0.875	RNGTT	5.10797	12.1897	8.41343	15.7166
chr6	97298847	97300847	GPR63	0.225123	0.319928	0.159097	0.212379	0.199405	1	0.537296	0.584905	0.284482	0.283279	0.51358	0.520833	GPR63	0.597699	0.13666	0.0667708	0.0204965
chr6	102202633	102205190	GRIK2	0.0348485	0.166667	0	0.0181992	0.333333	1	1	0.905882	0.180232	0.268011	0.916667	0.963768	GRIK2	0.011901	0	0.0585082	0
chr6	105400990	105403612	LIN28B	0	0	0	0.0162601	0.938235	1	NA	0.959615	0.0104575	0.0292517	0.703031	0.98018	LIN28B	19.1523	22.8197	0.0726381	0.117157
chr6	108722504	108724508	LACE1	0.357143	NA	0	0.190805	NA	1	NA	0.845238	0.339534	0.460694	0.933333	1	LACE1	1.42353	3.14262	3.92574	4.11709
chr6	152684077	152686117	SYNE1	0.444444	0.533333	0.324074	0.320083	0	1	NA	0.83	0.296361	0.62157	0.885702	0.930556	SYNE1	0.107216	0.310232	0.0988248	0.132046
chr6	156199438	156201521	LOC105378068	0.143483	0.161496	0.090475	0.105108	0.675362	NA	0.440476	0.53795	0.12383	0.137083	0.776042	0.902778	LOC105378068	0	0	0	0
chr6	160554356	160556785	SLC22A1	0.0348791	0.0259307	0	0.0218365	0.947368	0.236364	0.929412	0.740417	0.0860141	0.0964407	0.9466	0.921991	SLC22A1	0	0	0	0
chr6	161053371	161060008	LPA	0.0309482	0.0623562	0.0361909	0.0344978	0.416667	0.0952381	0.837302	0.669229	0.135258	0.1119	0.923861	0.957018	LPA	0	0	0	0
chr6	162067012	162069022	LOC105378098	0.234616	0.308198	0.392484	0.336553	0.86511	0.333333	0.822917	0.878196	0.345495	0.45156	0.975694	1	LOC105378098	0	0.164287	0	0
chr6	166239842	166242035	PDE10A	0.0207792	0	0	0.0517526	0.886364	1	0.909091	0.913853	0.150138	0.211055	0.869757	0.916667	PDE10A	0	0	0	0
chr6	168050528	168054854	LOC401286	0.139074	0.182143	0.096	0.0986146	1	0.838889	0.909091	0.885204	0.300188	0.445735	0.971731	0.940702	LOC401286	0	0	0	0
chr6	169632132	169635801	LOC101929523	0.311713	0.373849	0.1775	0.214747	0.904762	0.983333	0.857143	0.933563	0.357541	0.381531	0.924643	0.9309	LOC101929523	0.0647705	0.152028	0	0
chr6	170685747	170688087	FAM120B	0.375318	0.127981	0.330526	0.334337	0.818452	0.907365	0.885714	0.861953	0.497038	0.807863	0.9546	0.953342	FAM120B	0.0209074	0.157914	0.694451	1.46451
chr7	621553	625156	LOC101927000	0.0927835	0.0200617	0.0807843	0.0623058	0.0505051	0.906085	0.5	0.66034	0.189643	0.256944	0.873195	0.853988	LOC101927000	0	0	0	0
chr7	808076	810120	PRKAR1B	0.0101191	0.0263158	0	0.0113812	0.875	0.933333	0.835847	0.872163	0.140426	0.175255	0.918579	0.921851	PRKAR1B	4.77841	1.43338	6.40703	3.3996
chr7	947648	950723	ADAP1	0.0176175	0.0285423	0.0210046	0.0155038	0.715	0.857143	0.4	0.73165	0.0933635	0.164471	0.966778	0.980119	ADAP1	0	0.245445	0.0738928	0.0279567
chr7	1824139	1827212	ELFN1-AS1	0.379167	0.366667	0.430769	0.419361	0.84375	1	0.944444	0.845571	0.690911	0.652285	0.896088	0.969907	ELFN1-AS1	0	0	0	0
chr7	2312263	2316422	NUDT1	0.124178	0.129545	0.210653	0.143967	0.78046	0.780303	0.666667	0.709089	0.778009	0.690296	0.95158	0.947923	NUDT1	84.902	112.706	137.383	87.107
chr7	2613102	2619825	IQCE	0.0672577	0.0604886	0.0315334	0.0702521	0.420455	1	0.692284	0.655916	0.343	0.342953	0.94379	0.958391	IQCE	0.302161	0.273909	1.62523	0.623332
chr7	5540342	5542373	FBXL18	0.0435912	0.0151487	0	0.023501	0.913043	0.968889	0.766319	0.863827	0.0490977	0.0613728	0.925933	0.966369	FBXL18	0.902488	0.204585	0.637455	0.277297
chr7	6690702	6694825	ZNF316	0.0168712	0.0150476	0	0.0126822	0.662963	0.745098	0.918498	0.785486	0.0381238	0.043747	0.873229	0.840482	ZNF316	0.0296805	0	0.0182369	0.020966
chr7	6938438	6940438	CCZ1B	0	0	0.0428571	0.0346258	0.166667	1	0.933333	0.822222	0.739794	0.56292	0.969494	0.939474	CCZ1B	28.9428	32.7015	31.5771	40.9253
chr7	23454587	23456587	IGF2BP3	0.162641	0.0114942	0.544541	0.254909	0.875	NA	1	0.954545	0.364706	0.27081	0.95672	0.996226	IGF2BP3	9.81112	1.24347	10.4236	4.92744
chr7	28351361	28353361	CREB5	0	0	0.121428	0.0434524	1	1	0.833333	0.916667	0.49765	0.571754	0.945741	0.990909	CREB5	0	0.118115	0.0166752	0.00368599
chr7	28915918	28917973	TRIL	0.0151515	0.037037	0	0.0095238	NA	NA	1	0.979167	0.284248	0.323	0.992188	0.97619	TRIL	0	0	0.0529152	0
chr7	46366258	46368317	LOC730338	0.264355	0.198355	0.149455	0.189987	0.388223	0.496934	0.465025	0.391148	0.0079365	0.00705467	0.208333	0.25	LOC730338	0	0	0	0
chr7	61967209	61971328	ZNF733P	0.145388	0.198221	0.163771	0.177093	0.620863	0.612351	0.645567	0.633287	0.171156	0.155188	0.633254	0.58608	ZNF733P	0	0	0.16503	0
chr7	66021344	66023541	GS1-124K5.11	0.0321095	0.0357143	0.030303	0.0369939	0.762963	0.95339	0.853247	0.905804	0.0699884	0.0918939	0.949495	0.951415	GS1-124K5.11	21.2476	15.0116	7.59791	18.0445
chr7	74392370	74394370	PMS2P5	0.397619	0.321212	0.2125	0.381558	0.833333	0.875	NA	0.825	0.777778	0.8	1	1	PMS2P5	NA
chr7	80609086	80611086	SEMA3C	0.17	0.395834	0.0925926	0.16653	1	NA	NA	0.952381	0.235843	0.40387	0.762202	0.763636	SEMA3C	0	0	0.0774848	0
chr7	88116482	88118482	STEAP4	0.183333	NA	0.383333	0.282456	0.857143	NA	1	0.9375	0.487493	0.459103	0.896104	0.916667	STEAP4	0	0.211047	0	0.125002
chr7	97833413	97838448	TECPR1	0.130899	0.163014	0.00874316	0.1061	0.945402	0.930556	0.739542	0.8164	0.417327	0.437251	0.901356	0.927667	TECPR1	0.27331	0.0328236	0.463244	0.117367
chr7	98990159	98992215	PDAP1	0.0289352	0.05	0.0436782	0.039325	0.628205	NA	0.606061	0.680208	0.0349281	0.056847	0.912113	0.911746	PDAP1	29.8812	16.5268	14.1917	31.5096
chr7	101754838	101756838	SH2B2	0.080303	0.0633333	0	0.0863233	1	NA	0.928571	0.83956	0.353901	0.391212	0.993201	0.95614	SH2B2	1.29427	0.245592	7.06162	0.728271
chr7	105023890	105027409	SRPK2	0.175987	0.205108	0.0895192	0.104183	0.40503	1	0.486582	0.564263	0.0731049	0.140405	0.961818	0.848291	SRPK2	15.4476	28.6552	19.2224	14.0847
chr7	105343209	105345209	ATXN7L1	0.130864	0.136905	0	0.131905	0.75	NA	1	0.94	0.587303	0.70334	0.931034	0.913333	ATXN7L1	0.883802	1.20038	0.201383	1.82747
chr7	111848861	111850881	ZNF277	0	0	0.120988	0.063492	0.888889	1	NA	0.888889	0.451531	0.383157	0.888889	0.988235	ZNF277	10.5187	25.709	19.5093	15.256
chr7	116963462	116966473	WNT2	0.0555555	0	0.008547	0.02411	0.974747	NA	NA	0.711359	0.0162703	0.0246017	0.441736	0.678028	WNT2	0.25174	0.0692166	0.487385	0.442165
chr7	133108569	133110606	EXOC4	0.117544	NA	0.166666	0.113825	1	NA	0.961538	0.962963	0.313221	0.40796	0.921979	0.963964	EXOC4	3.06804	3.38442	2.19058	3.94878
chr7	135392896	135394933	SLC13A4	0.0999999	0	0.0633333	0.0709359	NA	0.886364	NA	0.886364	0.524995	0.63165	0.965148	1	SLC13A4	0.0386071	0	0.0474325	0
chr7	136623080	136625080	CHRM2	0	0	0.272727	0.101449	1	NA	NA	0.625	0.242445	0.399669	0.652765	0.622222	CHRM2	0	0	0	0
chr7	139257879	139259949	CLEC2L	0.0664352	0.034744	0.0530303	0.0573898	0.722222	0.5	0.789474	0.750717	0.510543	0.516495	0.940577	0.944182	CLEC2L	1.69904	3.57772	2.62269	1.59121
chr7	143208406	143210407	EPHA1-AS1	0.00526316	0.0166667	0.0162601	0.0312699	0.941176	0.669118	0.666667	0.703243	0.0991394	0.0786983	0.305088	0.484226	EPHA1-AS1	0.0379936	0	0.106712	0
chr7	148801421	148803428	ZNF786	0.019983	0.0196078	0.0196078	0.019376	0.5	1	0.777778	0.771825	0.0213384	0.0270432	0.929443	0.960811	ZNF786	0.204828	0.039691	0.251661	0.398714
chr7	148979307	148981307	LOC155060	0.15812	0.160784	0.175	0.169021	0.047619	0.875	1	0.586905	0.505608	0.501907	0.897903	0.904269	LOC155060	0.159578	0	0	0.020215
chr7	149768008	149770008	ATP6V0E2-AS1	0.226921	0.168956	0.139074	0.202154	0.349382	0.866667	0.432648	0.488845	0.806995	0.795779	0.925926	1	ATP6V0E2-AS1	0	0	0.364442	0
chr7	150094012	150096152	LOC728743	0.00562169	0	0.00528052	0.00589426	0.582946	0.166667	0.916667	0.669021	0.013152	0.015964	0.897665	0.893934	LOC728743	0.148703	0.441786	1.38044	0.856222
chr7	150654856	150657499	KCNH2	0.0148515	0	0.0104167	0.0232044	0.8	1	0.95	0.901219	0.21419	0.224324	0.918832	0.937675	KCNH2	0.187014	0.136064	0.574671	0.165155
chr7	151300465	151302465	PRKAG2	0.0277778	0	0.00625	0.029938	NA	0.9	0.8	0.895238	0.347965	0.41207	0.990942	1	PRKAG2	2.14294	4.57294	0	0
chr7	156733938	156736329	NOM1	0.0289165	0.0207792	0.0857435	0.0650454	0.846154	0.730769	0.933948	0.776028	0.13338	0.202576	0.536122	0.571046	NOM1	2.96952	1.75449	3.14652	1.1872
chr7	157687607	157690548	LOC100506585	0.231979	0.125	0.123737	0.171106	0.466667	0.879167	0.918841	0.819045	0.577864	0.656035	0.899376	0.901974	LOC100506585	0	0	0.0313519	0
chr8	832387	834439	ERICH1-AS1	0.0074074	0.00724637	0.025641	0.0117521	NA	0.916667	1	0.969841	0.00822511	0.00712337	0.587222	0.943182	ERICH1-AS1	0.0810952	0	1.59219	0.195404
chr8	1380289	1385495	DLGAP2	0.180145	0.18	0.0390573	0.130921	0.744303	0.857143	0.92	0.877949	0.608803	0.593087	0.966895	0.902501	DLGAP2	0	0	0.0388771	0
chr8	2261240	2263361	LOC101927815	0.0157143	0.0238095	0.138889	0.103584	0.785714	0.840909	0.87619	0.860666	0.146641	0.225488	0.910455	0.928175	LOC101927815	0	0	0	0
chr8	4212580	4214701	CSMD1	0.0555555	0	0	0.0288462	0.928571	0.888889	1	0.897059	0.494963	0.528615	0.824169	0.811404	CSMD1	0.177411	0.0342887	0.0908468	0.172821
chr8	6083526	6085526	LOC100287015	0.292857	0.102083	0	0.14639	0.857143	NA	0.714286	0.833333	0.666459	0.813667	0.929894	0.992857	LOC100287015	0.61777	1.90864	2.10163	1.56563
chr8	8560338	8562436	MFHAS1	0.0547619	0.0574074	0.241228	0.0851405	1	0.666667	0.933333	0.906703	0.13092	0.160991	0.864719	0.916292	MFHAS1	0.940996	0.648373	0.635333	0.99
chr8	11659295	11662090	FDFT1	0.258333	0.408571	0.00537634	0.0935917	0.25	0.888889	NA	0.717105	0.0165914	0.0200112	0.836092	0.885434	FDFT1	234.186	50.7097	178.145	173.695
chr8	12063623	12065623	FAM86B1	0.0227273	0	0	0.0104167	0.944445	0.8	NA	0.738776	0.206944	0.30133	1	1	FAM86B1	0.344788	0.0886821	0	0.238818
chr8	12395050	12408791	LOC100506990	0.0642423	0.0534215	0.0201661	0.050974	0.767448	0.864331	0.769657	0.769094	0.144948	0.237626	0.910975	0.897198	LOC100506990	1.31036	8.02614	1.15026	0.323151
chr8	18525457	18527457	PSD3	0.0196078	0	0	0.00757576	1	0.986667	0.9	0.972222	0.291248	0.276057	0.948889	0.993243	PSD3	0.448889	0.0685034	0.346205	0.181853
chr8	42292185	42296202	VDAC3	0.0468036	0.0682292	0.0452381	0.0479881	0.39319	0.962963	0.898148	0.775534	0.243029	0.294386	0.970587	0.951658	VDAC3	366.022	636.186	373.946	527.22
chr8	43793207	43795207	POTEA	0.0915134	0.132	0.0936768	0.0974121	0.509972	0.56082	0.480916	0.566467	0.250304	0.229179	0.611403	0.775652	POTEA	0	0	0	0
chr8	58116944	58126791	LOC286177	0.476552	0.380209	0.120603	0.322478	0.916911	0.9	0.939898	0.901009	0.780982	0.719646	0.918856	0.943475	LOC286177	0	0	0	0
chr8	96730509	96732618	C8orf37-AS1	0	NA	0.369048	0.184444	0.833333	NA	0.790909	0.783163	0.561274	0.502417	0.821759	0.833333	C8orf37-AS1	0.325612	16.6018	1.01146	1.88885
chr8	135656190	135658725	ZFAT-AS1	0.195788	0.226667	0.236111	0.247392	NA	0.722222	1	0.86	0.657981	0.783574	0.948232	1	ZFAT-AS1	0	0	0	2.21161e-125
chr8	141107576	141111577	TRAPPC9	0.0177388	0.0170304	0.00410256	0.011997	0.94697	0.94932	1	0.955047	0.0145382	0.0186864	0.920476	0.931907	TRAPPC9	0.0546348	0.180501	0.21104	0.286901
chr8	142094549	142097160	DENND3	0.030888	0.0493827	0.00625	0.0479917	0.333333	0.909091	0.722222	0.749074	0.35198	0.347151	0.870046	0.903472	DENND3	0	0	0	0
chr8	142215644	142218226	SLC45A4	0.0932969	0.0536036	0.124444	0.0907441	0.930147	0.942857	0.684959	0.757172	0.38724	0.380682	0.94842	0.94209	SLC45A4	0.245073	0.0603279	0.255539	0.167873
chr8	144204146	144206370	LY6H	0.191156	0.440476	0.121429	0.296788	0.462821	0.691176	0.397059	0.432019	0.252381	0.197987	0.371059	0.442029	LY6H	0	0	0	0
chr8	144388295	144391193	ZNF696	0.420174	0.405261	0.168718	0.341753	0.743395	0.861939	0.530013	0.746096	0.670407	0.732507	0.772371	0.851017	ZNF696	0.897944	0.514681	0.372568	0.317457
chr8	144810095	144812313	FAM83H	0.0219673	0.0557018	0.020915	0.0315865	0.820216	0.862069	0.62619	0.815132	0.100416	0.110487	0.905379	0.888568	FAM83H	2.79856	0.528402	1.45174	0.307035
chr8	145024716	145026716	PLEC	0.108874	0.0718391	0.0222222	0.117457	0.428571	0.954545	0.388235	0.548774	0.532655	0.532112	0.756595	0.942778	PLEC	1.23471	0.389335	2.28943	0.343233
chr8	145698418	145700463	FOXH1	0.0130522	0	0.0543859	0.0146296	0.015625	0.789474	0.447917	0.173858	0.0948679	0.20744	0.518751	0.481502	FOXH1	14.3208	5.30257	13.6004	10.7301
chr8	145825412	145829554	ARHGAP39	0.503776	0.54475	0.476942	0.475815	0.871944	0.947179	0.902191	0.907776	0.58749	0.701299	0.903943	0.980821	ARHGAP39	0.180743	0.0658695	0.316272	0.0329268
chr8	145848912	145855275	ARHGAP39	0.0176053	0.0256586	0.0369094	0.0344666	0.731522	0.93	0.869841	0.85726	0.371585	0.470227	0.955856	0.971886	ARHGAP39	0.180743	0.0658695	0.316272	0.0329268
chr9	3424487	3426517	RFX3	0.111111	0	NA	0.0909091	0.710714	1	NA	0.803922	0.28548	0.293921	0.966667	1	RFX3	0.6506	0.436019	0.783377	0.644233
chr9	5085952	5088126	JAK2	0	0	0.106944	0.0739709	0.75188	1	NA	0.843398	0.0749511	0.0813456	0.966751	0.916667	JAK2	0.797986	1.10415	1.49962	0.511092
chr9	37800567	37803749	DCAF10	0.00416666	0.00952381	0.02	0.00766667	1	0.952381	1	0.96875	0.00875349	0.00684921	0.886384	0.951908	DCAF10	2.32404	1.64028	0.0535198	0.0451166
chr9	66485656	66487874	LOC100132249	0.00673981	0.0095238	0	0.00488437	NA	0.164103	0.301905	0.319104	0.0913228	0.0899177	0.247479	0.36862	LOC100132249	0	0	0.0989209	0
chr9	66499062	66501179	PTGER4P2-CDK2AP2P2	0.268375	0.395833	0.289849	0.259825	0.941176	0.614286	0.390625	0.622793	0.361635	0.369911	0.640869	0.479716	PTGER4P2-CDK2AP2P2	0	0.104846	0.132054	0.0254761
chr9	68424741	68428181	FRG1JP	0.155184	0.128801	0.140217	0.155194	0.404762	0.542606	0.477917	0.431666	0.313618	0.307316	0.456101	0.426661	FRG1JP	3.2511	3.39228	1.29136	4.14118
chr9	70972126	70974185	PGM5	0	0.666667	NA	0.0869565	0.944444	NA	1	0.941734	0.0263158	0.291667	0.984127	1	PGM5	0	0	0	0
chr9	88667638	88669684	GOLM1	0.294401	0.28373	0.0931372	0.185749	0.785714	0.92	0.933333	0.817907	0.708611	0.753314	0.852324	0.906832	GOLM1	3.71309	3.35872	1.52049	3.25387
chr9	126108939	126112170	CRB2	0.258259	0.424243	0.216667	0.214926	0.875	0.833333	0.611111	0.741766	0.431771	0.577767	0.889394	0.872956	CRB2	6.72505e-10	1.46537e-09	9.91569e-11	0
chr9	136019644	136021710	RALGDS	0.0376812	0.0754902	0.0189076	0.037406	0.625	NA	0.238095	0.586789	0.283759	0.309305	0.946114	0.958295	RALGDS	0.554386	0.104665	6.16897	1.2888
chr9	136198994	136200994	SURF6	0.107714	0.2	0.156863	0.123761	0.222222	0.9	0.800358	0.734531	0.546344	0.586152	0.948041	0.936441	SURF6	14.0818	7.37201	14.494	9.68129
chr9	136982167	136984353	WDR5	0.142857	0.109375	NA	0.131081	0.895833	NA	0.159091	0.412846	0.00735294	0.0625	0.615385	0.28125	WDR5	59.262	67.1732	84.5621	79.8004
chr9	140301068	140304782	EXD3	0.0705882	0.00416667	0.114762	0.0641554	0.68	0.992188	0.708642	0.806233	0.274089	0.256438	0.949647	0.943089	EXD3	0.850575	0.269111	2.75567	1.10758
chr9	140702448	140706458	CACNA1B	0.0644678	0.0226751	0.0626984	0.0790871	0.923896	0.849537	0.897794	0.900528	0.382867	0.384237	0.946538	0.952017	CACNA1B	0.0111008	0.0644009	0.136448	0.0798484
chrX	2836059	2838114	ARSD	0.0428571	0.0114942	0	0.0228758	NA	0.856667	NA	0.877551	0.212691	0.22969	0.726429	0.700362	ARSD	0.0629454	0.0892947	0.360941	0.233928
chrX	37096519	37098519	FAM47C	0.174243	0.3125	NA	0.122449	0.285714	0	NA	0.292857	0.00833335	0.0147392	0.553333	0.607843	FAM47C	0	0	0	0
chrX	58562718	58583511	ZXDA	0.128556	0.117384	0.109309	0.133227	0.600414	0.729175	0.557995	0.643489	0.169554	0.190193	0.628083	0.588177	ZXDA	0	0	0.025673	0.091735
chrY	58819968	58828650	SPRY3	0.181432	1	0.178893	0.225039	0.980952	0.910488	0.780397	0.904382	0.372709	0.388474	0.65	0.833333	SPRY3	NA

## Sheet: AG hyper-methylated
DNA methylation in newly identified DMRs and expression of closest genes (hypermethylated in AG embryos)
				DNA methylation												FPKM
chr	start	end	Closest genes	AG bla rep1	AG bla rep2	AG bla rep3	AG bla merge	GG bla rep1	GG bla rep2	GG bla rep3	GG bla merge	Sperm rep1	Sperm rep2	Oocyte rep1	Oocyte rep2	Gene	AG bla rep1	AG bla rep2	GG bla rep1	GG bla rep2
chr1	136670	138778	LOC729737	0.498611	0.427957	0.519697	0.474809	0.0183673	0.666667	0.095238	0.196156	0.902247	0.902745	0.31537	0.105392	LOC729737	0.0909013	0.0199438	0.0998571	0.0109658
chr1	2370309	2373861	PEX10	0.339658	0.361833	0.289524	0.283143	0.0255102	0.0523809	0	0.0305196	0.933426	0.943154	0.0494427	0.138731	PEX10	2.76081	1.51225	5.23823	3.89254
chr1	2745832	2748038	TTC34	0.351905	0.337255	0.0555555	0.375811	0.272727	0	NA	0.125	0.958635	0.948384	0.57937	0.387202	TTC34	0	0	0	0
chr1	3142139	3144139	PRDM16	0.347475	0.386364	0.333334	0.317063	0	0	NA	0	0.974509	0.925353	0.0562618	0.0251572	PRDM16	0.0184919	0	0.0151232	0
chr1	6131637	6133637	KCNAB2	0.409101	0.201159	0.434783	0.329603	NA	0	0	0.0404762	0.979151	0.943982	0.181115	0.0786069	KCNAB2	0	0.0459582	0.0370229	0.0146068
chr1	9456633	9458633	LOC100506022	0.523718	0.15034	0.321429	0.366521	0	NA	0	0.0190476	0.949223	0.953534	0.0535714	0.184108	LOC100506022	0	0	0	0
chr1	68126393	68128393	GADD45A	0.658334	0.666667	NA	0.475	0.222222	0	NA	0.133333	0.738687	0.80351	0.0708333	0.1875	GADD45A	19.9888	27.4806	20.073	27.5202
chr1	225639375	225641848	LBR	0.636607	0.30303	0.326389	0.53254	0	0	0.333333	0.0344828	0.900146	0.870475	0.177279	0.129032	LBR	26.8946	34.006	30.7347	29.3457
chr10	824703	826800	DIP2C	0.599324	0.455128	0.466667	0.578275	0	0.0185185	0.0333333	0.0364865	0.970201	0.927373	0.146706	0.169444	DIP2C	0.434272	0.188963	0.133419	0.164799
chr10	3069408	3072868	PFKP	0.329487	0.233333	0.142857	0.366058	0	NA	0.0555555	0.0142857	0.899231	0.832179	0.0752442	0.173077	PFKP	27.6253	18.2984	34.6959	14.7838
chr10	46956059	46958065	LOC102724593	0.544861	0.578231	0.494048	0.573307	0	0.121212	NA	0.079365	0.975855	0.914183	0.0714286	0.061067	LOC102724593	0.229241	0	0.281116	0.0711448
chr10	134319075	134321107	INPP5A	0.432334	0.5	0.402778	0.450961	0.1	0.0416667	0.184444	0.0887209	0.823198	0.883353	0.141751	0.292027	INPP5A	5.37336	1.54064	8.4585	6.89736
chr11	397642	399892	PKP3	0.583961	0.606299	0.406971	0.548745	0.372453	0.333333	0.259259	0.331058	0.592542	0.743578	0.194307	0.130952	PKP3	11.1188	0.514518	8.59526	3.8469
chr11	1078410	1080457	MUC2	0.615409	0.663889	0.643056	0.595429	0	0.0617284	0.0518018	0.0462709	0.935787	0.935746	0.287959	0.208448	MUC2	0	0	0	0
chr11	1229521	1231982	MUC5B	0.721926	0.69304	0.661111	0.650267	0	0.188235	0.0166667	0.099452	0.977903	0.955641	0.548119	0.485278	MUC5B	0.0029446	0.00341417	0	0.00828899
chr11	1690937	1694139	KRTAP5-AS1	0.328089	0.316729	0.206018	0.277136	0.425	0	0.127595	0.147776	0.45264	0.785395	0.0350177	0.108772	KRTAP5-AS1	0	3.03802e-07	0	0
chr11	2021202	2025761	H19	0.663588	0.665706	0.794681	0.685535	0	0.0367647	0.0555556	0.0198095	0.927357	0.925703	0.0546375	0.0777174	H19	0.10173	0.0595316	2.62306	0.947284
chr11	60779666	60783261	CD6	0.225519	0.261905	0.122807	0.198655	0	0	0	0	0.939455	0.912329	0.107156	0.0538889	CD6	0	0.0212597	0.0899002	0.0104261
chr11	64417827	64421602	NRXN2	0.312794	0.245312	0.344927	0.296785	0	0.107292	0	0.0785133	0.949782	0.940565	0.20284	0.225289	NRXN2	0.188166	0.13216	0.826661	0.0618255
chr11	67219241	67221534	CABP4	0.356643	0.374638	0.411765	0.293599	0	0	0	0.00952381	0.954463	0.958499	0.222821	0.179882	CABP4	0	0	0	0
chr11	67383189	67385543	NDUFV1	0.413435	0.438214	0.333333	0.375086	0	0.0947368	0	0.207046	0.930846	0.9473	0.128231	0.151754	NDUFV1	138.615	112.413	298.073	215.42
chr11	69199362	69201368	LOC102724265	0.576819	0.55	0.0277778	0.456085	0	0	0	0.0583333	0.92691	0.951685	0.080933	0.350926	LOC102724265	0.0956082	0	0.176179	0
chr12	112951596	112954807	RPL6	0.437255	0.520833	0.23	0.416237	0	0.5	0.52381	0.195652	0.959958	0.944028	0.0929545	0.136752	RPL6	604.082	282.461	182.026	425.82
chr12	129329670	129331682	GLT1D1	0.596093	0.622606	0.732	0.622093	0	NA	0	0.0419608	0.952831	0.955171	0.254525	0.297696	GLT1D1	3.79584	1.54011	2.06089	2.78165
chr12	132811804	132816498	LOC100130238	0.589531	0.628492	0.548686	0.606424	0.0414142	0.176463	0.255923	0.160257	0.917173	0.57515	0.396641	0.181818	LOC100130238	0	0	0.0349716	0
chr13	89166846	89169891	LOC105370306	0.54226	0.379563	0.400794	0.453304	0.111111	0	0.12037	0.0717172	0.910571	0.910293	0	0.0588235	LOC105370306	0	0	0.368348	0
chr13	100060498	100062891	TM9SF2	0.461125	0.263977	0.423333	0.379028	0	0.0208334	0	0.004329	0.892795	0.877202	0.0684088	0.323188	TM9SF2	38.8634	33.5545	40.4745	38.1346
chr13	113665744	113667857	MCF2L	0.697225	0.75046	0.601542	0.665833	0.0662174	0.0239018	0.0527027	0.0601141	0.938698	0.92778	0.345536	0.210936	MCF2L	0	0.018714	0	0
chr13	114517093	114520285	GAS6-AS1	0.619078	0.458503	0.512366	0.556529	0.00909091	0.07	0.0333333	0.0496241	0.934243	0.954608	0.258082	0.245785	GAS6-AS1	6.59559e-09	9.55229e-10	0	1.2804e-08
chr14	57331774	57333774	OTX2-AS1	0.493333	0.5	1	0.580952	0	NA	NA	0	0.981302	0.959491	0.586274	0.724359	OTX2-AS1	0.0235564	0	0	0
chr14	75460935	75463161	EIF2B2	0.683797	0.623796	0.456662	0.627072	0.616667	0.0382353	0.549603	0.326168	0.804034	0.796086	0.45	0.4	EIF2B2	41.6051	67.2935	28.0326	67.9046
chr14	101286076	101288347	MEG3	0.511413	0.592206	0.452381	0.436959	0	0.0701754	0	0.0877976	0.951143	0.925859	0.086553	0.140244	MEG3	0	0.793237	15.5243	1.43033
chr14	104673724	104676859	KIF26A	0.532773	0.420339	0.291667	0.447525	0.180159	0	0.2	0.147154	0.954531	0.920381	0.1355	0.157509	KIF26A	0.278836	0.110955	0.0587405	0.162151
chr14	105118255	105120514	LOC101929634	0.856775	0.881888	0.669218	0.803902	0.305642	0.762681	0.315476	0.427945	0.960728	0.949365	0.68225	0.727778	LOC101929634	0	0	0.0355637	0
chr14	105412823	105417026	PLD4	0.579571	0.61746	0.42173	0.542535	0	0.0230415	0.321429	0.102075	0.973672	0.962113	0.148245	0.110228	PLD4	0	0	0	0
chr14	105517708	105519774	GPR132	0.450439	0.242424	0.212748	0.278905	0.00869565	0	0	0.00384615	0.971954	0.937607	0.0803672	0.102198	GPR132	0	0	0	0
chr16	68005575	68007575	SLC12A4	0.345656	0.695238	0.0833333	0.234076	0.047619	0	0	0.0277778	0.938089	0.880046	0.0814102	0.237798	SLC12A4	0.81761	0.205335	0.260606	0.421256
chr16	85895221	85897479	IRF8	0.554561	0.524	0.847222	0.596803	0.222222	0	0.02	0.055	0.919075	0.945739	0.173362	0.256333	IRF8	0.127821	0.272683	0.575791	0
chr16	89016628	89018729	CBFA2T3	0.539783	0.51768	0.547957	0.540398	0.0153061	0.0119048	0.237374	0.0984079	0.952914	0.956256	0.0980442	0.25	CBFA2T3	0	0	0	0
chr16	89141066	89144889	ACSF3	0.499352	0.454	0.436831	0.495244	0.153846	0.111111	0	0.0721519	0.858879	0.882058	0.124116	0.0788854	ACSF3	1.92829	1.42187	2.72873	3.26656
chr16	89898499	89902565	SPIRE2	0.784084	0.77996	0.333333	0.600972	0.1	0.922764	0.101786	0.375909	0.961226	0.933519	0.541406	0.653073	SPIRE2	0.154838	0.0400065	2.40971	0.568567
chr17	410998	414888	FAM101B	0.78803	0.750463	0.710183	0.726858	0.5	0.4	0.666667	0.515054	0.877633	0.888755	0.392756	0.262917	FAM101B	21.8553	11.9567	64.0306	26.5204
chr17	3755156	3757156	NCBP3	0.331467	0.516667	0.11875	0.28817	0.0166667	0	0.252747	0.0513873	0.966572	0.816339	0.0649936	0.0821138	NCBP3	4.5128	5.52448	4.45271	4.83081
chr17	3850780	3852798	ATP2A3	0.365912	0.501701	0.173333	0.337605	0	0	0.04375	0.0367274	0.97175	0.96531	0.101846	0.181818	ATP2A3	0.0648507	0.015067	0.170403	0.0147275
chr17	36348818	36350980	TBC1D3C	0.424173	0.383022	0.355368	0.391465	0.0192308	0.0561224	0.0847974	0.0523899	0.97219	0.874893	0.132615	0.217442	TBC1D3C	NA
chr17	78999909	79001997	BAIAP2-AS1	0.58668	0.555742	0.441905	0.586455	0	0	0	0.0380435	0.970389	0.954378	0.0384105	0.0884409	BAIAP2-AS1	0.0247813	0.0143931	0.182702	0.0421889
chr18	6952814	6954814	LOC101927188	0.405476	0.417391	0.0916667	0.327107	0.0416667	NA	0.111111	0.0766667	0.93622	0.917462	0.12452	0.186325	LOC101927188	0.0255735	0.176388	0.123154	0.134207
chr19	410872	413056	C2CD4C	0.687771	0.664374	0.682017	0.609696	0	0.293057	0	0.132242	0.935573	0.901889	0.0333909	0.0579365	C2CD4C	0	0.0208311	0.396167	0.0408532
chr19	9167317	9169317	MUC16	0.335119	0.420168	0.200694	0.37786	0.0417582	0	0.266667	0.0643809	0.979369	0.957154	0.210685	0.204861	MUC16	0.00119547	0	0.00881561	0
chr19	15263189	15265189	ILVBL	0.446667	0	0	0.460494	0	0	0	0	0.971309	0.960593	0.126111	0.141667	ILVBL	5.68831	1.83504	3.53932	1.70379
chr19	35596054	35598054	HPN-AS1	0.701732	0.690476	0.358333	0.619226	1	0	0.204545	0.285965	0.932765	0.896517	0.58338	0.546528	HPN-AS1	0	0	0.0369482	0.0675877
chr2	429689	432053	LOC105373352	0.693056	0.338542	0.354545	0.439339	0.125	NA	0	0.0595238	0.942289	0.929554	0.0676389	0.0462963	LOC105373352	0	0	0	0
chr2	925930	929588	SNTG2	0.505556	0.360294	0.312153	0.446534	0	NA	0	0.0121212	0.862133	0.898033	0.0240931	0.150446	SNTG2	0	0	0	0
chr2	10150780	10157173	KLF11	0.628557	0.725862	0.530359	0.610764	0.087276	0.122294	0.0346442	0.085059	0.947375	0.938358	0.166431	0.201025	KLF11	2.07319	1.33415	5.37341	7.23413
chr2	135364589	135366589	TMEM163	0.642305	0.493624	0.530628	0.577715	0.1	0.0327381	0.0864035	0.0723134	0.980742	0.948195	0.238061	0.28125	TMEM163	0	0.0361989	0	0.179018
chr2	237453265	237455282	ACKR3	0.337879	0.366667	0.205556	0.298107	NA	NA	0	0	0.863837	0.91011	0.0261538	0.0962033	ACKR3	0.110565	0.515262	0.543267	4.14736
chr2	239703120	239705462	TWIST2	0.66851	0.682703	0.578961	0.633751	0.114286	0.137281	0.291667	0.168057	0.945231	0.939815	0.144996	0.252033	TWIST2	0	0	0	0
chr2	241097087	241099482	COPS9	0.595577	0.622705	0.558333	0.538764	0.0141243	0.0576923	0.130952	0.0409306	0.946141	0.942583	0.0845894	0.097548	COPS9	593.988	431.572	481.59	393.046
chr20	48017029	48019062	KCNB1	0.476667	0.590909	0.666667	0.42716	0	0	0	0	0.961136	0.928436	0.133333	0.25	KCNB1	0.00448084	0.00519695	0.0110135	0
chr20	52249853	52251853	LOC105372672	0.496237	0.367778	0.185185	0.417292	0	0	0	0.060606	0.946394	0.879153	0.209957	0.0902299	LOC105372672	0	0	0	0.679559
chr20	61691280	61694542	HAR1A	0.451246	0.432908	0.259065	0.310615	0	0	0.2525	0.172701	0.95046	0.920749	0.10034	0.195	HAR1A	0	0	0	0
chr20	61981756	61983761	LOC100130587	0.609506	0.609429	0.3625	0.50743	0	0.0178571	NA	0.00892857	0.949811	0.912228	0.217002	0.12116	LOC100130587	0	0	0	0
chr20	62194382	62201753	HELZ2	0.564405	0.668931	0.27931	0.497544	0.0046729	0.0340579	0.0101942	0.0198299	0.966512	0.963632	0.0854358	0.0468963	HELZ2	0	0	0	0
chr21	35814081	35816081	KCNE1	0.681818	1	0	0.566818	0	0	0	0	0.86035	0.820624	0.15102	0.305556	KCNE1	0	0	0	0
chr21	43108323	43110373	RIPK4	0.597171	0.448508	0.365476	0.505619	0	0	0.0235294	0.0190476	0.886536	0.939844	0.226007	0.25969	RIPK4	1.65305	0.563018	0.805446	0.728961
chr21	44109398	44112035	PDE9A	0.703026	0.575526	0.148611	0.629746	0.113636	0.0808703	0.233135	0.147725	0.746279	0.877892	0.453825	0.318803	PDE9A	0	0.365335	0.480288	0.127804
chr21	44718748	44720765	TCONS_00029157	0.455264	0.47621	0.313218	0.351864	0.037037	0.00833335	0	0.0159658	0.919912	0.919292	0.115618	0.164155	TCONS_00029157	0	0	0	0
chr21	45784114	45786519	TRPM2	0.514907	0.5125	0.683333	0.549908	0	0	0.125	0.0373188	0.954834	0.958782	0.137117	0.110169	TRPM2	0.216761	0	0	0.124537
chr21	47712499	47714502	YBEY	0.726247	0.701428	0.639457	0.696895	0.35915	0	0.246203	0.25639	0.873737	0.938182	0.477513	0.538462	YBEY	74.1916	75.8612	42.3835	39.1795
chr3	195497851	195499979	MUC4	0.705357	0.725481	0.609033	0.59054	0.1	0.104167	0.11684	0.171076	0.966113	0.907917	0.148915	0.0333333	MUC4	0.0559129	0	0.0359633	0.190642
chr3	195542640	195544747	MUC4	0.574317	0.446347	0.481653	0.48463	0.0773809	0.0196078	0.0171053	0.0223164	0.91894	0.882685	0.0574074	0.11	MUC4	0.0559129	0	0.0359633	0.190642
chr3	195769451	195771615	TFRC	0.814815	0.75102	0.578571	0.718674	0	0	NA	0	0.605273	0.621386	0.177018	0.233333	TFRC	116.119	126.476	31.5745	55.3647
chr4	628962	630988	PDE6B	0.317458	0.254266	0.156463	0.254376	0.043956	0.2	0.266667	0.141899	0.955154	0.968392	0.427008	0.300617	PDE6B	0.345093	0.283398	0.0498773	0.0231937
chr4	840050	842359	CPLX1	0.594242	0.653604	0.25	0.48045	NA	0.0952381	0.196	0.150694	0.956971	0.920144	0.354301	0.4375	CPLX1	0.027067	0.0315314	0.332493	0.0933156
chr4	1390653	1393209	CRIPAK	0.675941	0.720178	0.528136	0.661388	0.243243	0	0.679365	0.38283	0.902198	0.907321	0.0111111	0.0510753	CRIPAK	0.234198	0.085908	0.0908758	0.125901
chr4	1417603	1424266	NKX1-1	0.454845	0.526932	0.425005	0.504067	0.159041	0.210069	0.378076	0.269843	0.813406	0.843906	0.117484	0.074295	NKX1-1	0	0	0	0
chr4	3565157	3569158	LRPAP1	0.688174	0.711715	0.605155	0.638122	0.0592106	0.0589552	0.0661458	0.0423287	0.872812	0.865213	0.110096	0.227205	LRPAP1	10.2979	11.5982	20.356	10.2049
chr4	187467684	187469903	MTNR1A	0.511071	0.111111	0.55	0.567585	0	0.25	0	0.12	0.938565	0.910289	0.38052	0.355311	MTNR1A	0	0	0	0
chr5	557147	559416	SLC9A3	0.64698	0.568627	0.370313	0.536467	0	0	0	0.0673611	0.974751	0.928069	0.0822312	0.0695153	SLC9A3	0.0696674	0.622275	0.781682	0.54859
chr5	1421688	1424518	SLC6A3	0.445818	0.448718	0.37803	0.415909	0.107207	0.0714286	0	0.0774598	0.793621	0.815768	0.272375	0.302111	SLC6A3	0	0	0	0.0318519
chr5	177522302	177524388	N4BP3	0.673451	0.732653	0.717818	0.68752	0.37931	NA	0.474031	0.453564	0.914159	0.900266	0.442857	0.566176	N4BP3	0.29797	0.146744	0.843273	0.127739
chr5	177952351	177954351	COL23A1	0.551079	0.507243	0.383623	0.407216	NA	0.0270833	NA	0.0785714	0.965527	0.919919	0.860667	0.712069	COL23A1	0	0	0.0899215	0.0626123
chr5	178220615	178222859	AACSP1	0.395466	0.371911	0.225	0.337622	0	NA	NA	0	0.929772	0.938003	0.167988	0.0984568	AACSP1	0	0	0	0
chr6	170212200	170214406	ERMARD	0.558367	0.508974	0.687037	0.58271	0	NA	NA	0.0952001	0.954636	0.945815	0.604321	0.481373	ERMARD	5.56929	16.5097	7.9092	8.40908
chr7	431478	434263	LOC442497	0.647531	0.619151	0.322222	0.538051	0	0.0666667	0.0555556	0.121107	0.953651	0.968307	0.368682	0.407228	LOC442497	0	0	0	0
chr7	611269	613286	LOC101927000	0.469231	0.335256	0.561765	0.476786	NA	0.1	0.0104167	0.0727848	0.950369	0.959948	0.319293	0.352247	LOC101927000	0	0	0	0
chr7	51455646	51458715	COBL	0.409129	0.440476	0.541204	0.399857	0.047619	0	0	0.0427351	0.920422	0.939233	0.178571	0.166667	COBL	8.76333	5.37354	11.8842	4.83166
chr7	56871761	56873761	LOC401357	0.684967	0.678947	0.194872	0.511074	0	0	0.0352564	0.0223577	0.809103	0.933066	0.16274	0.289474	LOC401357	0	0	0	0
chr7	64323192	64325512	ZNF273	0.720448	0.583333	0.633333	0.683514	0	1	0.333333	0.142361	0.936072	0.904538	0.596552	0.623611	ZNF273	3.4613	8.64072	3.39656	3.62824
chr8	17910984	17912984	ASAH1	0.439682	0.537037	0.570086	0.533953	0	NA	NA	0.0666666	0.92925	0.923565	0.345813	0.363333	ASAH1	69.9838	20.8266	20.6941	88.3487
chr8	34127936	34129936	DUSP26	0	NA	0.75	0.50496	NA	0.625	0	0.208333	0.946429	0.902196	0.4875	0.322222	DUSP26	0	0	0.276972	0
chr8	54111518	54113518	OPRK1	0.62585	0.566667	0.466667	0.546366	0	NA	NA	0.0238095	0.941755	0.907738	0.0823529	0.236508	OPRK1	0	0	0	0
chr8	130977764	130979764	FAM49B	0.391457	0.308081	0.203463	0.326131	0	0.0666667	NA	0.0307692	0.922101	0.949756	0.253759	0.166667	FAM49B	35.1884	36.2173	26.0317	36.1041
chr8	142367015	142369581	GPR20	0.634932	0.64282	0.276903	0.46879	0	0.241152	0.00952381	0.0740875	0.977548	0.970788	0.158613	0.197566	GPR20	0	0	0	0
chr8	142501859	142504474	MROH5	0.528152	0.446139	0.471725	0.481363	0	0.296296	0	0.117286	0.803567	0.896589	0.110556	0.140585	MROH5	0	0	0	0
chr8	143509306	143511451	TSNARE1	0.412987	0.205128	0.5	0.339488	0	NA	0	0	0.975669	0.934803	0.0222222	0.0217391	TSNARE1	0.186563	0.12994	0.257046	0.0170768
chr8	144247595	144250398	LY6H	0.404646	0.520899	0.417956	0.423625	0.0416667	0.348611	0.225	0.165028	0.945226	0.941005	0.13138	0.0962963	LY6H	0	0	0	0
chr9	320166	322898	DOCK8	0.628055	0.524386	0.615569	0.620197	0	0.938172	0.209902	0.431128	0.980025	0.933995	0.714622	0.507051	DOCK8	0.293473	0	0.230104	0.0177771
chr9	97094702	97096702	LOC100132077	0.491837	0	0.209524	0.496607	0	1	0	0.0769231	0.957352	0.885582	0.1	0	LOC100132077	0.133807	0.0623468	0.262991	0.292085
chr9	138150640	138152876	LOC401557	0.565547	0.584677	0.358219	0.475164	NA	0.0625	0.153889	0.103621	0.894465	0.922905	0.123977	0.136147	LOC401557	0	0	0	0.00843323
chr9	139648402	139651206	LCN8	0.56562	0.398492	0.628241	0.579767	0.195767	0	0.185185	0.127385	0.962769	0.944901	0.142499	0.118889	LCN8	0	0	0	0
chr9	140217402	140219538	NRARP	0.576429	0.675641	0.498056	0.523637	0.0646472	0.150926	0.185129	0.130883	0.968744	0.926492	0.634124	0.473177	NRARP	0.519782	0.403249	2.66071	1.96955
chrX	47245029	47247029	ZNF157	0.331373	0.322619	0	0.263636	0	0	NA	0	0.946452	0.932351	0.154686	0.105769	ZNF157	0	0	1.29703	0.183312
chrX	73602258	73604258	SLC16A2	0.555555	0.666667	NA	0.671202	0	0.333333	0	0.142857	0.751852	1	0	0.0285714	SLC16A2	0.066371	1.77353	0.717663	0.512617
chrX	154138803	154140984	F8	0.583333	0.539216	0.758333	0.589425	0	0.5	0.0952381	0.191667	0.881746	0.859004	0.0930481	0.283333	F8	0.0872465	0.482012	0.21437	0.14964
